# Supplementary material for: CRISPR spacers reveal diverse and abundant Thermococcales viruses in hydrothermal vents
Source: Research Square preprint supplement (doi:10.21203/rs.3.rs-8799458/v1), 2026-02-19
Supplement: Supplementary file 1 [file f654815336431c792f703558.xlsx]

## Sheet: Table S1
Table S1. JGI IMG metagenomes used in this study
IMG Genome ID	GOLD Analysis Project ID	Study Name	Genome Name / Sample Name	Sequencing Center		NCBI Biosample Accession	SRA ID	Sequencing Method	Depth In Meters	Geographic Location	Isolation	Latitude	Longitude	Sample Collection Date	Genome Size * assembled	Gene Count	Tc 16S Present
2728369446	Ga0180854	Deep subsurface and oceanic microbial communities from Witwatersrand Basin, South Africa, and the Canadian and Fennoscandian shields and at the Lost City Hydrothermal Field	Candidatus Hydrothermae bacterium JdFR-71	DOE Joint Genome Institute (JGI)											1702015	1705	no
2728369459	Ga0180863	Deep subsurface and oceanic microbial communities from Witwatersrand Basin, South Africa, and the Canadian and Fennoscandian shields and at the Lost City Hydrothermal Field	Caulobacteraceae bacterium JdFR-89	DOE Joint Genome Institute (JGI)											4055294	4245	no
3300003947	Ga0064033	Diffuse hydrothermal flow volcanic vent microbial communities from Axial Seamount, northeast Pacific Ocean	Diffuse hydrothermal flow volcanic vent microbial communities from Axial Seamount, northeast Pacific ocean - Sample FS907_80_13H8	Marine Biological Laboratory				Illumina HiSeq 1000	1542	Northeast Pacific Ocean: Anemone vent, Axial Seamount	Anemone diffuse flow vent, Axial seamount	45.933	-130.014		1107727	2799	yes
3300021469	Ga0190361	Microbial communities from sediments and microbial mats in various locations	Hydrothermal vent microbial mat bacterial communities from Southern Trench, Guaymas Basin, Mexico - 4872-18-4-5_MG	DOE Joint Genome Institute (JGI)		SAMN08777288	SRX3982332	Illumina HiSeq 2500-1TB	2011	Mexico: Guaymas Basin	Cathedral Hill gradient site, white microbial mat	27.0114	-110.596	2016/12/24	417006857	883977	yes
3300010912	Ga0137523	Diffuse hydrothermal flow volcanic vent microbial communities from Axial Seamount, northeast Pacific Ocean	Diffuse hydrothermal flow volcanic vent microbial communities from Axial Seamount, northeast Pacific ocean - Sample LVWS6_30_TP1_13L	Marine Biological Laboratory				Illumina HiSeq 1000	1516	Marker 33, Axial Seamount, Northeast Pacific Ocean	Marker 33 diffuse flow vent, Axial Seamount	45.9332	-129.982	2014/8	1510079	4197	yes
3300049907	Ga0496601	Hydrothermal vents viral and microbial communities from various locations in Pacific Ocean	Hydrothermal vent plume viral communities from North Pacific Ocean - CTD-AT42-06-003-450m-0.03 v	DOE Joint Genome Institute (JGI)		SAMN51146344	SRX30589637	Illumina NovaSeq S4	450	North Pacific Ocean	Pelagic ocean, hydrothermal vent plume	8.39977	-104.981	2018/12/6	212865533	501464	no
3300000272	Ga0011193	Marine microbial communities from a deep-sea hydrothermal vent at Loihi Seamount, Hawaii	Marine microbial communities from hydrothermal vents at Loihi seamountain, Hawaii	Pennsylvania State University				454 GS FLX Titanium	1271	Loihi Seamount, Hawaii	Biomats	18.9216	-155.936	2003/8/1	11279045	14844	no
3300013792	Ga0180409	Microbial community analysis of hydrothermal vent diffuse flow samples from Mid-Cayman Rise, Pacific Ocean	Microbial community analysis of hydrothermal vent diffuse flow samples from Mid-Cayman Rise, Pacific Ocean - FS856 IDBA reassembly	Marine Biological Laboratory						Mid-Cayman Rise	diffuse flow hydrothermal vent fluids			2012	107626372	198204	no
3300002571	Ga0032369	Ridgeia piscesae microbial communities from Northeast Pacific Ocean hydrothermal vents	Host-associated microbial community of the tubeworm Ridgeia piscesae from hydrothermal vents Sample -index 14 (Axial LF)	Canada's Michael Smith Genome Sciences Centre				Illumina HiSeq 2000, Illumina HiSeq 2500	1517.1	Axial Volcano (Hotspot 2)	Main endeavour ridge Hulk	47.9334	-129.967	2010/1/1	233449720	625911	no
2836434884	Ga0400565	Hydrothermal Fe-rich Mat Reference Genomes	Unclassified Zetaproteobacteria bacterium 664-BS3_FULL_No.4_0.7_65	University of Delaware											1275180	1390	no
3300017593	Ga0187538	Marine sediment microbial communities from ocean floor of Pescadero Basin in Gulf of California	Marine sediment microbial communities near hydrothermal vents on the ocean floor of Pescadero Basin in Gulf of California - pushcore 80. Combined Assembly of Gp0212433, Gp0212434, Gp0212435, Gp0212436	Stanford University				Illumina HiSeq 2500-1TB	3680	Pescadero Basin, Gulf of California	Marine sediments near hydrothermal vents in Pescadero Basin, Gulf of California	n/a	n/a	2015/4/1	752011864	814493	yes
2728369441	Ga0180866	Deep subsurface and oceanic microbial communities from Witwatersrand Basin, South Africa, and the Canadian and Fennoscandian shields and at the Lost City Hydrothermal Field	Acinetobacter sp. JdFR-94	DOE Joint Genome Institute (JGI)											368906	465	no
3300003745	Ga0062506	Diffuse hydrothermal flow volcanic vent microbial communities from Axial Seamount, northeast Pacific Ocean	Diffuse hydrothermal flow volcanic vent microbial communities from Axial Seamount, northeast Pacific ocean - Sample FS904_30_13H	Marine Biological Laboratory				Illumina HiSeq 1000	1516	Marker 33 diffuse flow vent, Axial Seamount	Marker 33 diffuse flow vent, Axial Seamount	45.9332	-129.982		3756743	8386	no
3300003177	Ga0055411	Black smoker hydrothermal chimney microbial communities from Manus Basin, Bismarck Sea	373B	Max Planck Institute for Marine Microbiology				Illumina MiSeq	1680	Manus Basin, Bismarck Sea	Black Smokers at Manus Basin, Bismarck Sea	-3.565	149.989		97844771	138783	no
3300028896	Ga0310050	Axial Seamount Reassemblies	Diffuse hydrothermal flow volcanic vent microbial communities from Axial Seamount, northeast Pacific ocean - Sample FS907_Anemone_DNA IDBA_UD reassembly	Marine Biological Laboratory				Illumina HiSeq 1000	1542	North Pacific Ocean: Axial Seamount	Anemone diffuse flow vent, Axial seamount	45.9332	-130.014	2014/8	226318478	510325	yes
2616644801	Ga0072641	Black smoker hydrothermal chimney microbial communities from Manus Basin, Bismarck Sea	Acidiferrobacter_a7	Max Planck Institute for Marine Microbiology											2041809	2092	no
2728369317	Ga0180857	Deep subsurface and oceanic microbial communities from Witwatersrand Basin, South Africa, and the Canadian and Fennoscandian shields and at the Lost City Hydrothermal Field	Candidatus Hydrothermarchaeota archaeon JdFR-16	DOE Joint Genome Institute (JGI)											1353114	1715	no
2772190906	Ga0260561	Hydrothermal Fe-rich Mat Reference Genomes	Beggiatoa sp. 664_BS3_FULL_No.1_1.8_98	University of Delaware											2849630	2640	no
3300010930	Ga0137764	Diffuse hydrothermal flow volcanic vent microbial communities from Axial Seamount, northeast Pacific Ocean	Diffuse hydrothermal flow volcanic vent microbial communities from Axial Seamount, northeast Pacific ocean - Sample FS917_55_13C_TP1_6	Marine Biological Laboratory				Illumina HiSeq 1000	1516	Marker 33, Axial Seamount, Northeast Pacific Ocean	Marker 33 diffuse flow vent, Axial Seamount	45.9332	-129.982	2015/8	12439901	25245	yes
3300003740	Ga0062508	Diffuse hydrothermal flow volcanic vent microbial communities from Axial Seamount, northeast Pacific Ocean	Diffuse hydrothermal flow volcanic vent microbial communities from Axial Seamount, northeast Pacific ocean - Sample FS904_55_12H	Marine Biological Laboratory				Illumina HiSeq 1000	1516	Marker 33 diffuse flow vent, Axial Seamount	Marker 33 diffuse flow vent, Axial Seamount	45.9332	-129.982		1398616	4057	no
3300019387	Ga0193940	Microbial communities from sediments and microbial mats in various locations	Sorted cell/s from Southern Trench hydrothermal vent microbial mat, Guaymas Basin, Mexico - 6AL_4869_21_21	DOE Joint Genome Institute (JGI)		SAMN08777490	SRX3974428	Illumina NextSeq-HO	2001	Mexico: Guaymas Basin	hydrothermal vent white microbial mat from Ultra Mound gradient site	27.001	-110.6	2016/12/21	324170	345	no
3300042040	Ga0451329	Mollusc gills microbial communities from various hydrothermal vent in Atlantic Ocean	Mollusc gills microbial communities from Lilliput hydrothermal vent, Atlantic Ocean - BspSym_Li_5_5-4	Max Planck Institute for Marine Microbiology		SAMEA5664327	ERX3367176	Illumina HiSeq 2500	1494	South Atlantic Ocean	mollusc gills	-9.54817	-13.2088	2009/4/29	149338563	172839	no
3300048643	Ga0496644	Hydrothermal vents viral and microbial communities from various locations in Pacific Ocean	Hydrothermal vent plume microbial communities from North Pacific Ocean - CTD-AT42-06-002-1000m-0.65	DOE Joint Genome Institute (JGI)		SAMN51146550	SRX30607109	Illumina NovaSeq S4	1000	North Pacific Ocean	Pelagic ocean, hydrothermal vent plume	8.39977	-104.981	2018/12/6	296841886	538297	no
3300010893	Ga0137773	Diffuse hydrothermal flow volcanic vent microbial communities from Axial Seamount, northeast Pacific Ocean	Diffuse hydrothermal flow volcanic vent microbial communities from Axial Seamount, northeast Pacific ocean - Sample FS917_55_13C_TP1_INC4_8	Marine Biological Laboratory				Illumina HiSeq 1000	1516	Marker 33, Axial Seamount, Northeast Pacific Ocean	Marker 33 diffuse flow vent, Axial Seamount	45.9332	-129.982	2015/8	793650	1725	no
2772191006	Ga0262971	Hydrothermal Fe-rich Mat Reference Genomes	Unclassified Zetaproteobacteria bacterium S6_FULL_No.4_4.1_98	University of Delaware											1896959	1933	no
3300026519	Ga0256839	Marine microbial communities from hydrothermal vents in the Atlantic and Pacific Ocean	Hydrothermal vent microbial communities from Mid Atlantic Ridge, Atlantic Ocean - 354-166	DOE Joint Genome Institute (JGI)		SAMN09093795	SRX4801604	Illumina HiSeq 2500-1TB	2262	Atlantic Ocean: Mid Atlantic Ridge	Hydrothermal sulfide rock	36.2297	-33.9011	2008/7/21	577576218	929962	yes
3300002587	Ga0041822	Diffuse hydrothermal flow volcanic vent microbial communities from Axial Seamount, northeast Pacific Ocean	Diffuse hydrothermal flow volcanic vent microbial communities from Axial Seamount, northeast Pacific ocean - Sample FS903_80_13L						1522	Marker 113, Axial Seamount, Northeast Pacific Ocean	Marker 113 diffuse flow vent, Axial Seamount	45.9227	-129.988		1419738	4602	no
3300010264	Ga0116201	Bacterial and archaeal communities from various locations to study Microbial Dark Matter (Phase II)	Marine hydrothermal vent microbial communities from Guaymas Basin, Gulf of California to study Microbial Dark Matter (Phase II) - Marker 14 Mat core 4571-4 33-36 cm metaG	DOE Joint Genome Institute (JGI)		SAMN06266163	SRX2525220	Illumina HiSeq 2500-1TB	2000	Mexico: Guaymas Basin, Gulf of California	marine hydrothermal sediment	27.0078	-111.407	2009/12/2	13337508	30532	yes
3300027412	Ga0209231	Deep subsurface and oceanic microbial communities from Witwatersrand Basin, South Africa, and the Canadian and Fennoscandian shields and at the Lost City Hydrothermal Field	Deep subsurface microbial communities from North Pacific Ocean - 450_OLKR46/470m Metagenome (SPAdes) (version 2)	DOE Joint Genome Institute (JGI)		SAMN09092741			2658	North Pacific Ocean	Deep subsurface	47.8861	-127.75	2013/1/15	144576246	242822	no
3300010926	Ga0137763	Diffuse hydrothermal flow volcanic vent microbial communities from Axial Seamount, northeast Pacific Ocean	Diffuse hydrothermal flow volcanic vent microbial communities from Axial Seamount, northeast Pacific ocean - Sample FS917_55_13C_TP1_5	Marine Biological Laboratory				Illumina HiSeq 1000	1516	Marker 33, Axial Seamount, Northeast Pacific Ocean	Marker 33 diffuse flow vent, Axial Seamount	45.9332	-129.982	2015/8	6420091	13979	yes
2836522917	Ga0400638	Hydrothermal Fe-rich Mat Reference Genomes	Unclassified Zetaproteobacteria bacterium 479-BS4_FULL_No.7_1.6_62	Western Washington University											1716019	1960	no
3300029958	Ga0310056	Axial Seamount Reassemblies	Diffuse hydrothermal flow volcanic vent microbial communities from Axial Seamount, northeast Pacific ocean - Background CTD	Marine Biological Laboratory				Illumina NextSeq	1200	North Pacific Ocean: Axial Seamount	Background seawater, Axial Seamount, northeast Pacific Ocean	45.9332	-129.999	2014/8/14	25406035	57694	no
3300001459	Ga0012510	Hydrothermal vent plume microbial communities from the Cayman Rise, Cayman Islands	Hydrothermal vent plume microbial communities from the Mid Cayman Rise - All Sites - lt1k	University of Michigan				Illumina HiSeq 2000	2000.000000 to 4000.000000	Mid Cayman Rise, Cayman Islands, UK	Mid Cayman Rise, Multiple sites combined	18.35	-81.85		198169809	718137	no
3300002770	Ga0047372	Diffuse hydrothermal flow volcanic vent microbial communities from Axial Seamount, northeast Pacific Ocean	Diffuse hydrothermal flow volcanic vent microbial communities from Axial Seamount, northeast Pacific ocean - Sample LVWS1_TP1_12L	The Marine Biological Laboratory				Illumina	1522	Marker 113, Axial Seamount, Northeast Pacific Ocean	Marker 113 diffuse flow vent, Axial Seamount	45.9227	-129.988		1443480	4134	no
3300001921	Ga0016745	Hydrothermal vent plume microbial communities from the Cayman Rise, Cayman Islands	Hydrothermal vent plume microbial communities from the Mid Cayman Rise - Shallow Sites - gte4kb	University of Michigan				Illumina HiSeq 2000	2000	Mid Cayman Rise, Cayman Islands, UK	Mid Cayman Rise, multiple sites combined	18.35	-81.85		424665720	665288	no
3300013834	Ga0180401	Microbial community analysis of hydrothermal vent diffuse flow samples from Mid-Cayman Rise, Pacific Ocean	Microbial community analysis of hydrothermal vent diffuse flow samples from Mid-Cayman Rise, Pacific Ocean - FS841 reassembly	Marine Biological Laboratory					2373	Mid-Cayman Rise	Mid-Cayman Rise	18.375	-81.7976	2012/1/10	6192	10	no
2140918015	Ga0010994	Marine microbial communities from hydrothermal vents in Juan de Fuca Ridge, Pacific Ocean	Marine microbial communities from hydrothermal vents in Juan de Fuca Ridge - 2A5 Middle Chimney	Duke University				454 GS FLX	2300	Roane, Mothra, Juan de Fuca	Microbial Community, DNA isolated from insert	47.9238	-129.109	2004/8/18	279430833	842566	no
3300010921	Ga0137661	Diffuse hydrothermal flow volcanic vent microbial communities from Axial Seamount, northeast Pacific Ocean	Diffuse hydrothermal flow volcanic vent microbial communities from Axial Seamount, northeast Pacific ocean - Sample LVWS4_55_TP1_12L	Marine Biological Laboratory				Illumina HiSeq 1000	1522	Marker 113, Axial Seamount, Northeast Pacific Ocean	Marker 113 diffuse flow vent, Axial Seamount	45.9227	-129.988	2014/8	3886819	7633	no
3300021589	Ga0190355	Microbial communities from sediments and microbial mats in various locations	Hydrothermal vent microbial mat bacterial communities from Southern Trench, Guaymas Basin, Mexico - 4872-13-13-14_MG	DOE Joint Genome Institute (JGI)		SAMN08779249	SRX3982313	Illumina HiSeq 2500-1TB	2011	Mexico: Guaymas Basin	Cathedral Hill gradient site, white microbial mat	27.0114	-110.596	2016/12/24	44940317	121160	no
3300013794	Ga0180415	Microbial community analysis of hydrothermal vent diffuse flow samples from Mid-Cayman Rise, Pacific Ocean	Microbial community analysis of hydrothermal vent diffuse flow samples from Mid-Cayman Rise, Pacific Ocean - FS881 IDBA reassembly	Marine Biological Laboratory				Illumina HiSeq	2370	Mid Cayman Rise	Old Man Tree, Von Damm, Mid Cayman Rise	18.375	-81.797	2013/6/27	121538689	229326	yes
2728369313	Ga0180868	Deep subsurface and oceanic microbial communities from Witwatersrand Basin, South Africa, and the Canadian and Fennoscandian shields and at the Lost City Hydrothermal Field	Archaeoglobus sp. JdFR-26	DOE Joint Genome Institute (JGI)											644825	710	no
3300010914	Ga0137527	Diffuse hydrothermal flow volcanic vent microbial communities from Axial Seamount, northeast Pacific Ocean	Diffuse hydrothermal flow volcanic vent microbial communities from Axial Seamount, northeast Pacific ocean - Sample LVWS6_55_TP1_12L	Marine Biological Laboratory				Illumina HiSeq 1000	1516	Marker 33, Axial Seamount, Northeast Pacific Ocean	Marker 33 diffuse flow vent, Axial Seamount	45.9332	-129.982	2014/8	1984392	4540	no
3300028834	Ga0310047	Axial Seamount Reassemblies	Diffuse hydrothermal flow volcanic vent microbial communities from Axial Seamount, northeast Pacific ocean - Sample FS904_Marker33_DNA IDBA_UD reassembly	The Marine Biological Laboratory				Illumina	1516	North Pacific Ocean: Axial Seamount	Marker 33 diffuse flow vent, Axial Seamount	45.9332	-129.982		184252502	394710	no
3300021979	Ga0232641	Characterization of microbial community from Mariana Back Arc	Hydrothermal fluids microbial communities from Mariana Back-Arc Basin vent fields, Pacific Ocean - Hafa_FS926 _150kmer	Marine Biological Laboratory				Illumina NextSeq	3277	Hafa Adai vent field, Mariana back arc basin	Hafa Adai vent field	16.9613	144.868	2016/12/10	607031046	1220947	yes
3300042718	Ga0454321	Microbial symbiotic communities from bathmodiolin mussel gills	Mollusc gills microbial communities from Clueless hydrothermal vent, Atlantic Ocean - BspSym_Cl_1_11-2 Re-assembly	Max Planck Institute for Marine Microbiology		SAMEA5664336	ERX3367185	Illumina HiSeq 2500	2972	South Atlantic Ocean	mollusc gills	-4.80327	-12.3718	2009/4/22	174909369	164454	no
2836447143	Ga0400573	Hydrothermal Fe-rich Mat Reference Genomes	Unclassified Zetaproteobacteria bacterium 664-SC8_FULL_No.4_1.7_7	University of Delaware											253009	294	no
3300049903	Ga0496593	Hydrothermal vents viral and microbial communities from various locations in Pacific Ocean	Hydrothermal vent fluid viral communities from North Pacific Ocean - A5006 v	DOE Joint Genome Institute (JGI)		SAMN51146349	SRX30589629	Illumina NovaSeq S4	2516	North Pacific Ocean	Pelagic ocean, hydrothermal vent fluid	9.838	-104.291	2018/12/10	67801173	128224	no
2836462403	Ga0400587	Hydrothermal Fe-rich Mat Reference Genomes	Unclassified Zetaproteobacteria bacterium 665-MMA12_FULL_No.7_1.8_66	University of Delaware											1152397	1456	no
3300001668	Ga0012479	Alviniconcha endosymbiont microbial communities from the Eastern Lau Spreading center hydrothermal vents, Pacific Ocean	Epsilon_v2	Harvard University				Illumina HiSeq 2000	2614.24	Eastern Lau Spreading Center, Kilo Moana	Alviniconcha endosymbiont	-20.0536	-176.133	2009/6/6	2007484	2254	no
2728369328	Ga0180930	Deep subsurface and oceanic microbial communities from Witwatersrand Basin, South Africa, and the Canadian and Fennoscandian shields and at the Lost City Hydrothermal Field	Aciduliprofundum sp. JdFR-45	DOE Joint Genome Institute (JGI)											1249758	1459	no
2728369295	Ga0180918	Deep subsurface and oceanic microbial communities from Witwatersrand Basin, South Africa, and the Canadian and Fennoscandian shields and at the Lost City Hydrothermal Field	Candidatus Bathyarchaeota archaeon JdFR-04	DOE Joint Genome Institute (JGI)											1067948	1334	no
3300002467	Ga0023004	Bathymodiolus Puteoserpentis microbial communities from the Logatchev hydrothermal field, Atlantic Ocean	Bathymodiolus Puteoserpentis microbial communities from the Logatchev hydrothermal field, Atlantic Ocean	Association Nationale Recherche Technologie				Illumina MiSeq, Illumina HiSeq 2500	3009	Atlantic ocean	Logatchev hydrothermal vent site	14.7525	-44.9793	2005/5/17	2865751	2953	no
3300027987	Ga0259480	Black smoker hydrothermal vent sediment microbial communities from the Guaymas Basin, Mid-Atlantic Ridge, South Atlantic Ocean	Black smoker hydrothermal vent sediment microbial communities from the Guaymas Basin, Mid-Atlantic Ridge, South Atlantic Ocean - BSmoChi-MAR-TVG11	Beijing Genomics Institute (BGI)				Illumina HiSeq X Ten	2770	Mid-Atlantic Ridge, South Atlantic Ocean	Mid-Atlantic Ridge, South Atlantic Ocean	-15.16	-13.35	2012/8	2907801961	3666640	no
3300003981	Ga0063042	Diffuse hydrothermal vent microbial communities from Menez Gwen hydrothermal field, Mid Atlantic ridge	Diffuse hydrothermal vent microbial communities from Menez Gwen hydrothermal field, Mid Atlantic ridge - MGW_A	Max Planck Institute for Plant Breeding Research						Mid-Atlantic Ridge	diffuse venting site				90566072	116630	yes
3300042709	Ga0454349	Microbial symbiotic communities from bathmodiolin mussel gills	Mollusc gills microbial communities from Lilliput hydrothermal vent, Atlantic Ocean - BspSym_Li_1_10-2 Re-assembly	Max Planck Institute for Marine Microbiology		SAMEA5664331	ERX3367180	Illumina HiSeq 2500	1494	South Atlantic Ocean	mollusc gills	-9.54817	-13.2088	2009/4/29	225418935	211446	no
2836504328	Ga0400626	Hydrothermal Fe-rich Mat Reference Genomes	Unclassified Zetaproteobacteria bacterium 476-BS1_FULL_No.2_1.0_85	Western Washington University											1475160	1742	no
3300050906	Ga0504782	Sorted cell/s from hydrothermal vent fluid, Lost City Hydrothermal field, North Atlantic Ocean	Sorted cell/s from hydrothermal vent fluid, Lost City Hydrothermal field, North Atlantic Ocean - AH-954-A10	DOE Joint Genome Institute (JGI)		SAMN49211294	SRX29505253	Illumina NovaSeq S4		North Atlantic Ocean	hydrothermal vent fluid	30.1194	-42.1248	2018/9/21	1016392	1009	no
2821865472	Ga0248285	Genome sequencing of Thermotogales isolates from hydrothermal vents	Thermosipho melanesiensis 432	Norwegian Sequencing Centre (NSC)		SAMN03284848		Illumina MiSeq		Pacific Ocean, Lau Basion	Pacific Ocean, Lau Basin				1889798	2024	no
3300048885	Ga0496668	Hydrothermal vents viral and microbial communities from various locations in Pacific Ocean	Hydrothermal vent plume microbial communities from Gulf of California, Mexico - CTD-FK190211-025-400m-0.65	DOE Joint Genome Institute (JGI)		SAMN51146755	SRX30607440	Illumina NovaSeq S4	400	Mexico: Gulf of California	Pelagic ocean, hydrothermal vent plume	23.9566	-108.862	2019/3/9	245164515	412495	no
3300002583	Ga0041820	Diffuse hydrothermal flow volcanic vent microbial communities from Axial Seamount, northeast Pacific Ocean	Diffuse hydrothermal flow volcanic vent microbial communities from Axial Seamount, northeast Pacific ocean - Sample FS903_80_12L	The Marine Biological Laboratory					1522	Marker 113, Axial Seamount, Northeast Pacific Ocean	Marker 113 diffuse flow vent, Axial Seamount	45.9227	-129.988		954871	2850	no
3300010897	Ga0137518	Diffuse hydrothermal flow volcanic vent microbial communities from Axial Seamount, northeast Pacific Ocean	Diffuse hydrothermal flow volcanic vent microbial communities from Axial Seamount, northeast Pacific ocean - Sample LVWS5_55_TP2_13H	Marine Biological Laboratory				Illumina HiSeq 1000	1542	Northeast Pacific Ocean: Anemone vent, Axial Seamount	Anemone diffuse flow vent, Axial Seamount	45.933	-130.014	2014/8	712504	1785	no
3300010889	Ga0137531	Diffuse hydrothermal flow volcanic vent microbial communities from Axial Seamount, northeast Pacific Ocean	Diffuse hydrothermal flow volcanic vent microbial communities from Axial Seamount, northeast Pacific ocean - Sample LVWS6_55_TP2_12L	Marine Biological Laboratory				Illumina HiSeq 1000	1516	Marker 33, Axial Seamount, Northeast Pacific Ocean	Marker 33 diffuse flow vent, Axial Seamount	45.9332	-129.982	2014/8	86061	229	no
3300048880	Ga0496654	Hydrothermal vents viral and microbial communities from various locations in Pacific Ocean	Hydrothermal vent plume microbial communities from Gulf of California, Mexico - CTD-FK190211-008-700m-0.1	DOE Joint Genome Institute (JGI)		SAMN51148796	SRX30607219	Illumina NovaSeq S4	700	Mexico: Gulf of California	Pelagic ocean, hydrothermal vent plume	27.5832	-111.465	2019/3/3	414391792	756149	no
3300019383	Ga0193930	Microbial communities from sediments and microbial mats in various locations	Sorted cell/s from Southern Trench hydrothermal vent sediment, Guaymas Basin, Mexico - 6V_4868_13_28	DOE Joint Genome Institute (JGI)		SAMN08779210	SRX3974127	Illumina NextSeq-HO	2002	Mexico: Guaymas Basin	hydrothermal vent brown sediment near microbial mat from Ultra Mound, Coring site 2, gradient	27.001	-110.6	2016/12/19	183566	301	no
3300010894	Ga0137516	Diffuse hydrothermal flow volcanic vent microbial communities from Axial Seamount, northeast Pacific Ocean	Diffuse hydrothermal flow volcanic vent microbial communities from Axial Seamount, northeast Pacific ocean - Sample LVWS5_55_TP2_12H	Marine Biological Laboratory				Illumina HiSeq 1000	1542	Northeast Pacific Ocean: Anemone vent, Axial Seamount	Anemone diffuse flow vent, Axial Seamount	45.933	-130.014	2014/8	602333	1731	no
3300007776	Ga0105674	Diffuse hydrothermal flow volcanic vent microbial communities from Axial Seamount, northeast Pacific Ocean	Diffuse hydrothermal flow volcanic vent microbial communities from Axial Seamount, northeast Pacific ocean - Sample FS915_Marker113_DNA CLC_assembly	Marine Biological Laboratory				Illumina NextSeq	1520	Marker113 Vent, Axial Seamount, northeast Pacific Ocean	Marker113 Vent, Axial Seamount, northeast Pacific Ocean	45.9228	-129.988	2015/8/25	404034605	744609	no
3300048644	Ga0496645	Hydrothermal vents viral and microbial communities from various locations in Pacific Ocean	Hydrothermal vent plume microbial communities from North Pacific Ocean - CTD-AT42-06-001-2750m-0.65	DOE Joint Genome Institute (JGI)		SAMN51147159	SRX30607111	Illumina NovaSeq S4	2750	North Pacific Ocean	Pelagic ocean, hydrothermal vent plume	8.3721	-104.375	2018/12/6	586848700	951314	no
2728369326	Ga0180932	Deep subsurface and oceanic microbial communities from Witwatersrand Basin, South Africa, and the Canadian and Fennoscandian shields and at the Lost City Hydrothermal Field	Archaeoglobus sp. JdFR-24	DOE Joint Genome Institute (JGI)											2701738	2905	no
3300065501	Ga0606396	Hydrothermal vents viral and microbial communities from various locations in Pacific Ocean	Hydrothermal vent plume viral communities from North Pacific Ocean - CTD-AT42-06-003-550m-0.03 v	DOE Joint Genome Institute (JGI)				Illumina NovaSeq S4	550	North Pacific Ocean	Pelagic ocean, hydrothermal vent plume	8.39977	-104.981	2018/12/6	234838645	621032	no
3300050908	Ga0504784	Sorted cell/s from hydrothermal vent fluid, Lost City Hydrothermal field, North Atlantic Ocean	Sorted cell/s from hydrothermal vent fluid, Lost City Hydrothermal field, North Atlantic Ocean - AH-954-A23	DOE Joint Genome Institute (JGI)		SAMN49217432	SRX29498438	Illumina NovaSeq S4		North Atlantic Ocean	hydrothermal vent fluid	30.1194	-42.1248	2018/9/21	1063437	975	no
2836497390	Ga0400620	Hydrothermal Fe-rich Mat Reference Genomes	Unclassified Zetaproteobacteria bacterium S7_FULL_No.10_1.9_22	University of Delaware											453484	537	no
3300010330	Ga0136651	Bacterial and archaeal communities from various locations to study Microbial Dark Matter (Phase II)	Marine hydrothermal vent microbial communities from Guaymas Basin, Gulf of California to study Microbial Dark Matter (Phase II) - Marker 14 Mat core 4569-2 3-6 cm metaG (version 2)	DOE Joint Genome Institute (JGI)		SAMN06264663	SRX2525187	Illumina HiSeq 2500-1TB	2000	Mexico: Guaymas Basin, Gulf of California	marine hydrothermal sediment	27.0078	-111.407	2009/11/30	1159571654	2483439	yes
3300001516	Ga0012491	Hydrothermal vent plume microbial communities from Tahi Moana, Pacific Ocean, of black smokers	Hydrothermal vent plume microbial communities from Tahi Moana, Pacific Ocean, of black smokers	University of Michigan				Illumina HiSeq 2000	2230	Tahi Moana, ELSC, Pacific Ocean	Tahi Moana, ELSC, Pacific Ocean	-20.0644	-176.172		178791248	300470	no
2728369321	Ga0180887	Deep subsurface and oceanic microbial communities from Witwatersrand Basin, South Africa, and the Canadian and Fennoscandian shields and at the Lost City Hydrothermal Field	Archaeoglobi archaeon JdFR-42	DOE Joint Genome Institute (JGI)											2148619	2429	no
3300024423	Ga0190286	Microbial communities from sediments and microbial mats in various locations	Hydrothermal vent microbial mat bacterial communities from Southern Trench, Guaymas Basin, Mexico - 4869-18-3-4_MG	DOE Joint Genome Institute (JGI)		SAMN09200248	SRX4387639, SRX4387640	Illumina HiSeq 2500-1TB	2001	Mexico: Guaymas Basin	Ultra Mound gradient site, orange microbial mat	27.0074	-110.591	2016/12/21	431675414	1007877	yes
3300019382	Ga0193938	Microbial communities from sediments and microbial mats in various locations	Sorted cell/s from Southern Trench hydrothermal vent microbial mat, Guaymas Basin, Mexico - 6AI_4869_20_06	DOE Joint Genome Institute (JGI)		SAMN08778860	SRX3974425	Illumina NextSeq-HO	2001	Mexico: Guaymas Basin	hydrothermal vent orange microbial mat from Ultra Mound gradient site	27.001	-110.6	2016/12/21	253544	326	no
3300009487	Ga0119763	Microbial community analysis of hydrothermal vent diffuse flow samples from Mid-Cayman Rise, Pacific Ocean	Microbial community analysis of hydrothermal vent diffuse flow samples from Mid-Cayman Rise, Pacific Ocean - FS854 no min length	Marine Biological Laboratory				Illumina HiSeq		Mid-Cayman Rise	diffuse flow fluid, FS854, Piccard, Mid-Cayman Rise			2012	296153474	988681	no
3300007771	Ga0105700	Diffuse hydrothermal flow volcanic vent microbial communities from Axial Seamount, northeast Pacific Ocean	Diffuse hydrothermal flow volcanic vent microbial communities from Axial Seamount, northeast Pacific ocean - Sample FS917_Marker33_DNA CLC_assembly	Marine Biological Laboratory				Illumina NextSeq	1518	Marker33 Vent, Axial Seamount, northeast Pacific Ocean	Marker33 Vent, Axial Seamount, northeast Pacific Ocean	45.9332	-129.982	2015/8/26	336912167	625924	yes
2675903492	Ga0124430	Halomonas hydrothermalis Genome sequencing	Halomonas hydrothermalis MTCC 5445	CSIR-Central Salt and Marine Chemicals Research Institute		SAMN03199083	SRX763335	454		India: Aadri Veraval Gujarat coast	Sea water	20.959	70.2794		3840851	3556	no
2836545582	Ga0400652	Hydrothermal Fe-rich Mat Reference Genomes	Unclassified Zetaproteobacteria bacterium 481-BS4_FULL_No.8_1.0_95	Western Washington University											2427083	2436	no
2893493604	Ga0454296	Hydrothermal Fe-rich Mat Reference Genomes	Unclassified Sphingobacteriales bacterium S19_FULL_No.1_0.9_98	University of Delaware											2687068	2473	no
2630968207	Ga0078064	Single Amplified Genomes from Iheya North hydrothermal field in the Okinawa Trough	Thermomicrobiales bacterium SCGC AB-790-L07 (contamination screened)	Bigelow Laboratory Single Cell Genomics Center (SCGC)				Illumina		Pacific Ocean	Okinawa Trough				462464	457	no
2836558319	Ga0400674	Hydrothermal Fe-rich Mat Reference Genomes	Unclassified Zetaproteobacteria bacterium 482-BS8_FULL_No.6_1.2_98	Western Washington University											2431505	2574	no
3300001522	Ga0012527	Hydrothermal vent plume microbial communities from Tui Malila, Pacific Ocean, of black smokers	Hydrothermal vent plume microbial communities from Mariner/Tui Malila, Pacific Ocean, of black smokers	University of Michigan				Illumina HiSeq 2000	1900	Mariner, ELSC, Pacific Ocean	Mariner, ELSC, Pacific Ocean	-20.0644	-176.172		222169584	385075	no
3300048639	Ga0496637	Hydrothermal vents viral and microbial communities from various locations in Pacific Ocean	Hydrothermal vent plume microbial communities from North Pacific Ocean - CTD-AT42-06-003-450m-0.65	DOE Joint Genome Institute (JGI)		SAMN51147418	SRX30607210	Illumina NovaSeq S4	450	North Pacific Ocean	Pelagic ocean, hydrothermal vent plume	8.39977	-104.981	2018/12/6	421016025	682995	no
8063526702	Ga0578878	Microbial community from the Prony Hydrothermal Field and related strains: Genome sequencing and assembly	Vallitalea guaymasensis Ra1766G1	Mediterranean Institute of Oceanography (MIO)		SAMN14689426		Illumina HiSeq, Oxford Nanopore GridION		Mexico: Gulf of California, Guaymas Basin		27.0122	-111.415		5626074	4953	no
2728369312	Ga0180867	Deep subsurface and oceanic microbial communities from Witwatersrand Basin, South Africa, and the Canadian and Fennoscandian shields and at the Lost City Hydrothermal Field	Archaeoglobus sp. JdFR-25	DOE Joint Genome Institute (JGI)											885114	973	no
3300050919	Ga0504795	Sorted cell/s from hydrothermal vent fluid, Lost City Hydrothermal field, North Atlantic Ocean	Sorted cell/s from hydrothermal vent fluid, Lost City Hydrothermal field, North Atlantic Ocean - AH-954-G13	DOE Joint Genome Institute (JGI)		SAMN49208324	SRX29501509	Illumina NovaSeq S4		North Atlantic Ocean	hydrothermal vent fluid	30.1194	-42.1248	2018/9/21	2415543	2232	no
2619619000	Ga0073567	Genome sequencing of Thermotogales isolates from hydrothermal vents	Thermosipho affectus ikt275mar	Norwegian Sequencing Centre (NSC)		SAMN03483421		Illumina MiSeq		Atlantic Ocean Rainbow hydrothermal vents	Atlantic Ocean Rainbow hydrothermal vents	36.2167	-33.9		1771018	1770	no
3300003885	Ga0063294	Black smoker hydrothermal vent sediment microbial communities from the Guaymas Basin, Mid-Atlantic Ridge, South Atlantic Ocean	Black smoker hydrothermal vent sediment microbial communities from the Guaymas Basin, Mid-Atlantic Ridge, South Atlantic Ocean - Sample 1	Beijing Genomics Institute (BGI)				Illumina HiSeq 2500	2770	Mid-Atlantic Ridge, South Atlantic Ocean	Mid-Atlantic Ridge, South Atlantic Ocean	-15.16	-13.35	2012/8	1415392384	2622442	no
2728369330	Ga0180936	Deep subsurface and oceanic microbial communities from Witwatersrand Basin, South Africa, and the Canadian and Fennoscandian shields and at the Lost City Hydrothermal Field	Archaeoglobus sp. JdFR-32	DOE Joint Genome Institute (JGI)											1966558	2194	no
3300010917	Ga0137766	Diffuse hydrothermal flow volcanic vent microbial communities from Axial Seamount, northeast Pacific Ocean	Diffuse hydrothermal flow volcanic vent microbial communities from Axial Seamount, northeast Pacific ocean - Sample FS917_55_13C_TP1_8	Marine Biological Laboratory				Illumina HiSeq 1000	1516	Marker 33, Axial Seamount, Northeast Pacific Ocean	Marker 33 diffuse flow vent, Axial Seamount	45.9332	-129.982	2015/8	2510603	5844	no
649633022	Ga0028125	BESC Fast Track Microbial Sequencing	Caldicellulosiruptor hydrothermalis 108	DOE Joint Genome Institute (JGI)		SAMN00713562		454, Illumina		Kamchatka, Russia	Terrestrial neutral geothermal spring; Russia, Kamchatka				2770676	2685	no
3300049902	Ga0496612	Hydrothermal vents viral and microbial communities from various locations in Pacific Ocean	Hydrothermal vent plume viral communities from Gulf of California, Mexico - CTD-FK190211-14-1990m-0.03 v	DOE Joint Genome Institute (JGI)		SAMN51146921	SRX30589722	Illumina NovaSeq S4	1990	Mexico: Gulf of California	Pelagic ocean, hydrothermal vent plume	27.0131	-111.405	2019/3/5	119149900	279887	no
2728369335	Ga0180872	Deep subsurface and oceanic microbial communities from Witwatersrand Basin, South Africa, and the Canadian and Fennoscandian shields and at the Lost City Hydrothermal Field	Archaeoglobus sp. JdFR-38	DOE Joint Genome Institute (JGI)											1025490	1213	no
3300042711	Ga0454323	Microbial symbiotic communities from bathmodiolin mussel gills	Mollusc gills microbial communities from Clueless hydrothermal vent, Atlantic Ocean - BspSym_Cl_3_11-4 Re-assembly	Max Planck Institute for Marine Microbiology		SAMEA5664334	ERX3367183	Illumina HiSeq 2500	2972	South Atlantic Ocean	mollusc gills	-4.80327	-12.3718	2009/4/22	216445704	196103	no
3300013797	Ga0180403	Microbial community analysis of hydrothermal vent diffuse flow samples from Mid-Cayman Rise, Pacific Ocean	Microbial community analysis of hydrothermal vent diffuse flow samples from Mid-Cayman Rise, Pacific Ocean - FS844 IDBA reassembly	Marine Biological Laboratory				Illumina MiSeq	2376	Mid-Cayman Rise	diffuse flow fluid	18.3747	-81.7973	2012/1/17	196958927	248623	no
3300022170	Ga0190366	Microbial communities from sediments and microbial mats in various locations	Hydrothermal vent microbial mat bacterial communities from Southern Trench, Guaymas Basin, Mexico - 4872-18-9-10_MG	DOE Joint Genome Institute (JGI)		SAMN08776745	SRX3982359	Illumina HiSeq 2500-1TB	2011	Mexico: Guaymas Basin	Cathedral Hill gradient site, white microbial mat	27.0114	-110.596	2016/12/24	116537782	266968	yes
3300013789	Ga0180402	Microbial community analysis of hydrothermal vent diffuse flow samples from Mid-Cayman Rise, Pacific Ocean	Microbial community analysis of hydrothermal vent diffuse flow samples from Mid-Cayman Rise, Pacific Ocean - FS842 IDBA reassembly	Marine Biological Laboratory				Illumina MiSeq	2388	Mid-Cayman Rise, Pacific Ocean	Ravelin #2 hydrothermal vent FS842	18.3752	-81.7971	2012/1/17	38714045	69301	yes
2616644900	Ga0072706	Hydrothermal vent microbial communities from Crab Spa hydrothermal vent, East Pacific Rise	Alpha proteobacterium SCGC AD-698-M03 (contamination screened)	Bigelow Laboratory Single Cell Genomics Center (SCGC)				Illumina		Pacific Ocean: East Pacific Rise, Crab Spa		9.83997	-104.294		67472	56	no
2772191008	Ga0262973	Hydrothermal Fe-rich Mat Reference Genomes	Unclassified Zetaproteobacteria bacterium S6_FULL_No.6_3.0_85	University of Delaware											1494528	1645	no
3300010928	Ga0137760	Diffuse hydrothermal flow volcanic vent microbial communities from Axial Seamount, northeast Pacific Ocean	Diffuse hydrothermal flow volcanic vent microbial communities from Axial Seamount, northeast Pacific ocean - Sample FS917_55_12C_TP1_8	Marine Biological Laboratory				Illumina HiSeq 1000	1516	Marker 33, Axial Seamount, Northeast Pacific Ocean	Marker 33 diffuse flow vent, Axial Seamount	45.9332	-129.982	2015/8	8250382	17420	no
3300010892	Ga0137663	Diffuse hydrothermal flow volcanic vent microbial communities from Axial Seamount, northeast Pacific Ocean	Diffuse hydrothermal flow volcanic vent microbial communities from Axial Seamount, northeast Pacific ocean - Sample LVWS4_55_TP1_13L	Marine Biological Laboratory				Illumina HiSeq 1000	1522	Marker 113, Axial Seamount, Northeast Pacific Ocean	Marker 113 diffuse flow vent, Axial Seamount	45.9227	-129.988	2014/8	556735	1616	no
2616644905	Ga0072711	Hydrothermal vent microbial communities from Crab Spa hydrothermal vent, East Pacific Rise	Nautilia sp. SCGC AD-702-J15 (contamination screened)	Bigelow Laboratory Single Cell Genomics Center (SCGC)				Illumina		Pacific Ocean: East Pacific Rise, Crab Spa		9.83997	-104.294		1027675	1148	no
2836479923	Ga0400602	Hydrothermal Fe-rich Mat Reference Genomes	Unclassified Zetaproteobacteria bacterium 667-BS4_FULL_No.13_1.9_58	University of Delaware											1077042	1277	no
3300048642	Ga0496640	Hydrothermal vents viral and microbial communities from various locations in Pacific Ocean	Hydrothermal vent plume microbial communities from North Pacific Ocean - CTD-AT42-06-002-625m-0.65	DOE Joint Genome Institute (JGI)		SAMN51147058	SRX30607194	Illumina NovaSeq S4	625	North Pacific Ocean	Pelagic ocean, hydrothermal vent plume	8.39977	-104.981	2018/12/6	683064459	1139091	no
3300002584	Ga0041821	Diffuse hydrothermal flow volcanic vent microbial communities from Axial Seamount, northeast Pacific Ocean	Diffuse hydrothermal flow volcanic vent microbial communities from Axial Seamount, northeast Pacific ocean - Sample FS903_80_13H						1522	Marker 113, Axial Seamount, Northeast Pacific Ocean	Marker 113 diffuse flow vent, Axial Seamount	45.9227	-129.988		943506	2910	no
3300017525	Ga0186822	Archaeal and Bacterial diversity and function in deep-sea hydrothermal influenced sediments	Deep-sea sediment microbial communities from hydrothermal vent field in the North Atlantic Ocean - Menez Gwen vent	Biocant				Illumina MiSeq	825	the North Atlantic Ocean	deep-sea hydrothermal vent field	37.8445	-31.5193	2013/8/6	213248925	398414	no
3300050945	Ga0504823	Sorted cell/s from hydrothermal vent fluid, Lost City Hydrothermal field, North Atlantic Ocean	Sorted cell/s from hydrothermal vent fluid, Lost City Hydrothermal field, North Atlantic Ocean - AH-956-I20	DOE Joint Genome Institute (JGI)		SAMN49208333	SRX29504741	Illumina NovaSeq S4		North Atlantic Ocean	hydrothermal vent fluid	30.1197	-42.1244	2018/9/21	3354656	2649	no
3300019384	Ga0193909	Microbial communities from sediments and microbial mats in various locations	Sorted cell/s from Southern Trench hydrothermal vent microbial mat, Guaymas Basin, Mexico - 3C_4868_08_16	DOE Joint Genome Institute (JGI)		SAMN08776959	SRX3973869	Illumina NextSeq-HO	2002	Mexico: Guaymas Basin	hydrothermal vent yellow microbial mat from Ultra Mound, Coring site 2	27.001	-110.6	2016/12/19	135757	221	no
3300067030	Ga0496658	Hydrothermal vents viral and microbial communities from various locations in Pacific Ocean	Hydrothermal vent plume microbial communities from Gulf of California, Mexico - CTD-FK190211-18-72m-0.1	DOE Joint Genome Institute (JGI)				Illumina NovaSeq S4	72	Mexico: Gulf of California	Pelagic ocean, hydrothermal vent plume	27.0107	-111.407	2019/3/6	786486655	1364297	no
2836443206	Ga0400571	Hydrothermal Fe-rich Mat Reference Genomes	Unclassified Zetaproteobacteria bacterium 664-SC8_FULL_No.2_3.6_97	University of Delaware											2245413	2326	no
3300010968	Ga0139250	Inactive Hydrothermal Chimney Metagenome Study	Microbial communities from the middle layer of the microbial mat covering an inactive hydrothermal chimney from the Kolumbo submarine volcano, Santorini, Greece - V16_c.mid	Hellenic Centre for Marine Research (HCMR)				Illumina MiSeq		Kolumbo submarine Volcano, Hellenic Volcanic Arc, Aegean Sea, Greece	Hydrothermal chimney	36.52	25.48		207028785	336102	no
2836558089	Ga0400672	Hydrothermal Fe-rich Mat Reference Genomes	Unclassified Zetaproteobacteria bacterium 482-BS8_FULL_No.4_1.6_3	Western Washington University											62645	84	no
3300050940	Ga0504818	Sorted cell/s from hydrothermal vent fluid, Lost City Hydrothermal field, North Atlantic Ocean	Sorted cell/s from hydrothermal vent fluid, Lost City Hydrothermal field, North Atlantic Ocean - AH-956-E16	DOE Joint Genome Institute (JGI)		SAMN49208294	SRX29504542	Illumina NovaSeq S4		North Atlantic Ocean	hydrothermal vent fluid	30.1197	-42.1244	2018/9/21	1734197	1819	no
2772191019	Ga0262984	Hydrothermal Fe-rich Mat Reference Genomes	Unclassified Zetaproteobacteria bacterium S6_FULL_No.23_0.8_32	University of Delaware											1084532	1352	no
2728369314	Ga0180869	Deep subsurface and oceanic microbial communities from Witwatersrand Basin, South Africa, and the Canadian and Fennoscandian shields and at the Lost City Hydrothermal Field	Archaeoglobus sp. JdFR-28	DOE Joint Genome Institute (JGI)											752164	806	no
3300038380	Ga0434945	Diffuse flow microbial communities from hydrothermal vent near Loihi Seamount, Hawaii, USA	Diffuse flow microbial communities from hydrothermal vent near Loihi Seamount, Hawaii, USA - 41	The Marine Biological Laboratory				Illumina NextSeq	1000.000000 to 1200.000000	USA: Loihi Seamount, Hawaii	Diffuse flow from hydrothermal vent	18.92	-155.27	2018/8	466393386	609881	yes
2728369448	Ga0180884	Deep subsurface and oceanic microbial communities from Witwatersrand Basin, South Africa, and the Canadian and Fennoscandian shields and at the Lost City Hydrothermal Field	Candidatus Hydrothermae bacterium JdFR-75	DOE Joint Genome Institute (JGI)											789045	988	no
3300010913	Ga0137774	Diffuse hydrothermal flow volcanic vent microbial communities from Axial Seamount, northeast Pacific Ocean	Diffuse hydrothermal flow volcanic vent microbial communities from Axial Seamount, northeast Pacific ocean - Sample FS917_55_13C_TP1_INC4_9	Marine Biological Laboratory				Illumina HiSeq 1000	1516	Marker 33, Axial Seamount, Northeast Pacific Ocean	Marker 33 diffuse flow vent, Axial Seamount	45.9332	-129.982	2015/8	2095668	4216	yes
8051826704	Ga0176270	Genome sequencing of cellulolytic heat tolerant Bacillus isolates from Yellowstone National Park hydrothermal-vegetative environments	Bacillus licheniformis YNP2-TSU	Tennessee State University		SAMN05560474	SRX2018999	Illumina HiSeq 3000	0.04	USA: Yellowstone National Park, Wyoming	amphitheater springs near vegetative/sediment and waters edge	44.8016	-110.729		4763591	5456	no
2836576319	Ga0400684	Hydrothermal Fe-rich Mat Reference Genomes	Unclassified Zetaproteobacteria bacterium 483-BS63_FULL_No.4_2.9_40	Western Washington University											694707	840	no
3300001524	Ga0012505	Black smokers hydrothermal plume microbial communities from Abe, Lau Basin, Pacific Ocean (2)	Abe Hydrothermal Plume	University of Michigan				Illumina HiSeq 2000	2100	Abe	Abe, ELSC, Pacific Ocean	-21	176		250668864	447309	no
3300049904	Ga0496596	Hydrothermal vents viral and microbial communities from various locations in Pacific Ocean	Hydrothermal vent plume viral communities from North Pacific Ocean - CTD007 v	DOE Joint Genome Institute (JGI)		SAMN51146410	SRX30589514	Illumina NovaSeq S4	2500	North Pacific Ocean	Pelagic ocean, hydrothermal vent plume	9.83807	-104.291	2018/12/12	137144009	331013	no
3300021592	Ga0190362	Microbial communities from sediments and microbial mats in various locations	Hydrothermal vent microbial mat bacterial communities from Southern Trench, Guaymas Basin, Mexico - 4872-18-5-6_MG	DOE Joint Genome Institute (JGI)		SAMN08776762	SRX3982333	Illumina HiSeq 2500-1TB	2011	Mexico: Guaymas Basin	Cathedral Hill gradient site, white microbial mat	27.0114	-110.596	2016/12/24	93872894	234219	no
2836520566	Ga0400636	Hydrothermal Fe-rich Mat Reference Genomes	Unclassified Zetaproteobacteria bacterium 479-BS4_FULL_No.5_2.1_15	Western Washington University											597206	766	no
3300022207	Ga0236252	Characterization of microbial community from Mariana Back Arc	Hydrothermal fluids microbial communities from Mariana Back-Arc Basin vent fields, Pacific Ocean - Burke_FS924_RNA_SIP 150_kmer	Marine Biological Laboratory				Illumina NextSeq	3630	Burke vent field, Mariana back arc basin	Burke vent field	18.1826	144.72	2016/12/7	841932	2215	yes
3300001555	Ga0012410	Hydrothermal vent plume microbial communities from the Mid Cayman Rise Von Damm vent site (2)	Mid Cayman Rise	University of Michigan				Illumina HiSeq 2000	2041	Mid Cayman Rise	Von Damm hydrothermal vent site (Plume)	18.3763	-81.7891	2012/1/18	4707983	5678	no
2836459607	Ga0400583	Hydrothermal Fe-rich Mat Reference Genomes	Unclassified Zetaproteobacteria bacterium 665-MMA12_FULL_No.3_4.6_98	University of Delaware											1601993	1829	no
2616644875	Ga0072667	Hydrothermal vent microbial communities from Crab Spa hydrothermal vent, East Pacific Rise	Sulfurovum sp. SCGC AD-133-G19 (contamination screened)	Bigelow Laboratory Single Cell Genomics Center (SCGC)				Illumina		Pacific Ocean: East Pacific Rise, Crab Spa		9.83997	-104.294		259558	233	no
3300028042	Ga0256844	Marine microbial communities from hydrothermal vents in the Atlantic and Pacific Ocean	Mussel associated microbial communities from hydrothermal vent at the East Pacific Rise, Pacific Ocean - Mussels	DOE Joint Genome Institute (JGI)		SAMN10350641	SRX5246517	Illumina HiSeq 2500-1TB	2503	Pacific Ocean: East Pacific Rise	Scraping of mussels Bathymodiolus thermophilus	9.8441	-104.297	2014/11/8	626608301	1191976	no
2836475880	Ga0400598	Hydrothermal Fe-rich Mat Reference Genomes	Unclassified Zetaproteobacteria bacterium 667-BS4_FULL_No.9_2.7_28	University of Delaware											728273	927	no
3300001550	Ga0012531	Hydrothermal vent plume microbial communities from Lau Basin, Pacific Ocean	Hydrothermal vent plume microbial communities from Lau Basin, Pacific Ocean - Lau MG2c_2					Illumina HiSeq 2000		Lau Basin, Pacific Ocean	Lau Basin, Pacific Ocean	20.32	176.8		1853656	1619	no
2616644870	Ga0072662	Hydrothermal vent microbial communities from Crab Spa hydrothermal vent, East Pacific Rise	Sulfurovum sp. SCGC AC-213-P02 (contamination screened)	Bigelow Laboratory Single Cell Genomics Center (SCGC)				Illumina		Pacific Ocean: East Pacific Rise, Crab Spa		9.83997	-104.294		882222	922	no
3300021567	Ga0190340	Microbial communities from sediments and microbial mats in various locations	Hydrothermal vent sediment bacterial communities from Southern Trench, Guaymas Basin, Mexico - 4872-04-13-14_MG	DOE Joint Genome Institute (JGI)		SAMN08779245	SRX3982296	Illumina HiSeq 2500-1TB	2011	Mexico: Guaymas Basin	Cathedral Hill gradient site, bare sediment just outside mat	27.0114	-110.596	2016/12/24	20745460	62316	no
2616644907	Ga0072713	Hydrothermal vent microbial communities from Crab Spa hydrothermal vent, East Pacific Rise	Sulfurovum sp. SCGC AD-702-L15 (contamination screened)	Bigelow Laboratory Single Cell Genomics Center (SCGC)				Illumina		Pacific Ocean: East Pacific Rise, Crab Spa		9.83997	-104.294		1026723	1070	no
3300049999	Ga0496611	Hydrothermal vents viral and microbial communities from various locations in Pacific Ocean	Hydrothermal vent plume viral communities from Gulf of California, Mexico - CTD-FK190211-03-2004m-0.03 v	DOE Joint Genome Institute (JGI)		SAMN51146978	SRX30593239	Illumina NovaSeq S4	2004	Mexico: Gulf of California	Pelagic ocean, hydrothermal vent plume	26.0166	-111.007	2019/3/2	121158590	291788	no
3300001768	Ga0012998	Hydrothermal vent plume microbial communities from the Cayman Rise, Cayman Islands	Hydrothermal vent plume microbial communities from the Mid Cayman Rise - Deep Background Supr62	University of Michigan				Illumina HiSeq 2000	4000	Deep Background, Mid Cayman Rise	Deep Background, Mid Cayman Rise	18.35	-81.85		116341812	156159	no
2616644886	Ga0072692	Hydrothermal vent microbial communities from Crab Spa hydrothermal vent, East Pacific Rise	Bacterium SCGC AD-687-F17 (unscreened)	Bigelow Laboratory Single Cell Genomics Center (SCGC)				Illumina		Pacific Ocean: East Pacific Rise, Crab Spa		9.83997	-104.294		1865503	1869	no
2836530648	Ga0400645	Hydrothermal Fe-rich Mat Reference Genomes	Unclassified Zetaproteobacteria bacterium 481-BS4_FULL_No.1_26.9_66	Western Washington University											1211287	1383	no
2140918014	Ga0010976	Marine microbial communities from hydrothermal vents in Juan de Fuca Ridge, Pacific Ocean	Marine microbial communities from hydrothermal vents in Juan de Fuca Ridge - 3A2 Outer Chimney	Duke University				454 GS FLX	2300	Roane, Mothra, Juan De Fuca	Microbial Community, DNA extracted from insert	47.9238	-129.109	2004/8/18	279430833	842566	no
3300048882	Ga0496663	Hydrothermal vents viral and microbial communities from various locations in Pacific Ocean	Hydrothermal vent plume microbial communities from Gulf of California, Mexico - CTD-FK190211-03-2004m-0.1	DOE Joint Genome Institute (JGI)		SAMN51146758	SRX30607222	Illumina NovaSeq S4	2004	Mexico: Gulf of California	Pelagic ocean, hydrothermal vent plume	26.0166	-111.007	2019/2/27	324674662	523091	no
2836499372	Ga0400622	Hydrothermal Fe-rich Mat Reference Genomes	Unclassified Zetaproteobacteria bacterium S7_FULL_No.12_1.5_19	University of Delaware											526410	651	no
3300014924	Ga0182796	Microbial community analysis of hydrothermal vent diffuse flow samples from Mid-Cayman Rise, Pacific Ocean	Microbial community analysis of hydrothermal vent diffuse flow samples from Mid-Cayman Rise, Pacific Ocean - FS856 IDBA reassembly (rename)	Marine Biological Laboratory						Mid-Cayman Rise	diffuse flow hydrothermal vent fluids			2012	62872978	81150	no
3300003529	Ga0060337	Diffuse hydrothermal flow volcanic vent microbial communities from Axial Seamount, northeast Pacific Ocean	Diffuse hydrothermal flow volcanic vent microbial communities from Axial Seamount, northeast Pacific ocean - Sample FS898_N3Area_RNA					Illumina	1530	North Pacific Ocean: Axial Seamount	N3 Area diffuse flow vent, Axial seamount	45.9437	-129.985		3359483	10899	no
2616644881	Ga0072687	Hydrothermal vent microbial communities from Crab Spa hydrothermal vent, East Pacific Rise	Arcobacter sp. SCGC AD-684-A04 (contamination screened)	Bigelow Laboratory Single Cell Genomics Center (SCGC)				Illumina		Pacific Ocean: East Pacific Rise, Crab Spa		9.83997	-104.294		1687778	1802	no
3300050947	Ga0504825	Sorted cell/s from hydrothermal vent fluid, Lost City Hydrothermal field, North Atlantic Ocean	Sorted cell/s from hydrothermal vent fluid, Lost City Hydrothermal field, North Atlantic Ocean - AH-956-J15	DOE Joint Genome Institute (JGI)		SAMN49218532	SRX29496420	Illumina NovaSeq S4		North Atlantic Ocean	hydrothermal vent fluid	30.1197	-42.1244	2018/9/21	248706	306	no
3300021483	Ga0190331	Microbial communities from sediments and microbial mats in various locations	Hydrothermal vent sediment bacterial communities from Southern Trench, Guaymas Basin, Mexico - 4872-04-4-5_MG	DOE Joint Genome Institute (JGI)		SAMN08779459	SRX30218266	Illumina HiSeq 2500-1TB	2011	Mexico: Guaymas Basin	Cathedral Hill gradient site, bare sediment just outside mat	27.0114	-110.596	2016/12/24	99749804	214654	yes
3300015260	Ga0183267	Seawater microbial communities from hydrothermal vent in East China Sea, Taiwan, China	Seawater microbial communities from hydrothermal vent in East China Sea, Taiwan, China - gui-2014 surface metaG	Shanghai Hanyu Bio-Tech Co., Ltd				Illumina HiSeq, Illumina MiSeq		East China Sea, Taiwan, China	durface of the hydrothermal vent	25	128		107426491	392608	no
3300003744	Ga0062510	Diffuse hydrothermal flow volcanic vent microbial communities from Axial Seamount, northeast Pacific Ocean	Diffuse hydrothermal flow volcanic vent microbial communities from Axial Seamount, northeast Pacific ocean - Sample FS904_55_13H	Marine Biological Laboratory				Illumina HiSeq 1000	1516	Marker 33 diffuse flow vent, Axial Seamount	Marker 33 diffuse flow vent, Axial Seamount	45.9332	-129.982		4454272	7288	no
2728369333	Ga0180935	Deep subsurface and oceanic microbial communities from Witwatersrand Basin, South Africa, and the Canadian and Fennoscandian shields and at the Lost City Hydrothermal Field	Archaeoglobus sp. JdFR-31	DOE Joint Genome Institute (JGI)											2351345	2715	no
2728369429	Ga0180874	Deep subsurface and oceanic microbial communities from Witwatersrand Basin, South Africa, and the Canadian and Fennoscandian shields and at the Lost City Hydrothermal Field	Pseudomonas sp. JdFR-91	DOE Joint Genome Institute (JGI)											3770010	3500	no
2836466124	Ga0400591	Hydrothermal Fe-rich Mat Reference Genomes	Unclassified Zetaproteobacteria bacterium 667-BS4_FULL_No.2_5.8_29	University of Delaware											550386	628	no
2836466753	Ga0400592	Hydrothermal Fe-rich Mat Reference Genomes	Unclassified Zetaproteobacteria bacterium 667-BS4_FULL_No.3_4.8_34	University of Delaware											770101	787	no
3300042039	Ga0451327	Mollusc gills microbial communities from various hydrothermal vent in Atlantic Ocean	Mollusc gills microbial communities from Lucky Strike-Montsegur hydrothermal vent, Atlantic Ocean - BazoSym_LS-MS_1_1048F	Max Planck Institute for Marine Microbiology		SAMEA5664344	ERX3367193	Illumina HiSeq 2500	1700	North Atlantic Ocean	mollusc gills	37.2881	-32.2756	2013/8/9	8664676	11618	no
2616644877	Ga0072669	Hydrothermal vent microbial communities from Crab Spa hydrothermal vent, East Pacific Rise	Sulfurovum sp. SCGC AD-133-N19 (contamination screened)	Bigelow Laboratory Single Cell Genomics Center (SCGC)				Illumina		Pacific Ocean: East Pacific Rise, Crab Spa		9.83997	-104.294		1185022	1248	no
3300021499	Ga0190337	Microbial communities from sediments and microbial mats in various locations	Hydrothermal vent sediment bacterial communities from Southern Trench, Guaymas Basin, Mexico - 4872-04-10-11_MG	DOE Joint Genome Institute (JGI)		SAMN08779102	SRX3982280	Illumina HiSeq 2500-1TB	2011	Mexico: Guaymas Basin	Cathedral Hill gradient site, bare sediment just outside mat	27.0114	-110.596	2016/12/24	144358644	327090	yes
3300050943	Ga0504821	Sorted cell/s from hydrothermal vent fluid, Lost City Hydrothermal field, North Atlantic Ocean	Sorted cell/s from hydrothermal vent fluid, Lost City Hydrothermal field, North Atlantic Ocean - AH-956-G14	DOE Joint Genome Institute (JGI)		SAMN49218537	SRX29505271	Illumina NovaSeq S4		North Atlantic Ocean	hydrothermal vent fluid	30.1197	-42.1244	2018/9/21	219950	285	no
2588253913	Ga0058438	Salinisphaera hydrothermalis C41B8 Genome sequencing	Salinisphaera hydrothermalis C41B8	Third Institute of Oceanography, State Oceanic Administration		SAMN02929445									4282309	3856	no
3300048743	Ga0496911	Hydrothermal vents viral and microbial communities from various locations in Pacific Ocean	Metatranscriptome of hydrothermal vent fluid microbial communities from North Pacific Ocean - A5006-insitu (Metagenome Metatranscriptome)	DOE Joint Genome Institute (JGI)		SAMN52640466	SRX30974594	Illumina NovaSeq S4	2516	North Pacific Ocean	Pelagic ocean, hydrothermal vent fluid	9.838	-104.291	2018/12/10	66849702	154454	no
2836528840	Ga0400642	Hydrothermal Fe-rich Mat Reference Genomes	Unclassified Zetaproteobacteria bacterium 479-BS4_FULL_No.11_1.2_8	Western Washington University											370892	434	no
3300041399	Ga0453483	Diffuse flow microbial communities from hydrothermal vent near Loihi Seamount, Hawaii, USA	Diffuse flow microbial community from hydrothermal vent near Loihi Seamount, Hawaii, USA - MH5512C9	Marine Biological Laboratory				Illumina NextSeq 500		USA: Kilauea Volcano, Hawaii	Diffuse flow from hydrothermal vent at Kilauea Volcano, Hawaii	19.42	-155.28	2018/8/28	2530518	3770	no
3300048884	Ga0496667	Hydrothermal vents viral and microbial communities from various locations in Pacific Ocean	Hydrothermal vent plume microbial communities from Gulf of California, Mexico - CTD-FK190211-01-2006m-0.1	DOE Joint Genome Institute (JGI)		SAMN51146913	SRX30607699	Illumina NovaSeq S4	2006	Mexico: Gulf of California	Pelagic ocean, hydrothermal vent plume	27.0013	-111.412	2019/2/26	395939517	637963	yes
3300003507	Ga0060293	Diffuse hydrothermal flow volcanic vent microbial communities from Axial Seamount, northeast Pacific Ocean	Diffuse hydrothermal flow volcanic vent microbial communities from Axial Seamount, northeast Pacific ocean - Sample FS827_N3Area_RNA					Illumina	1524	North Pacific Ocean: Axial Seamount	N3 Area diffuse flow vent, Axial seamount	45.944	-129.985	2011/1/1	4761312	15090	no
3300021509	Ga0190304	Microbial communities from sediments and microbial mats in various locations	Hydrothermal vent sediment bacterial communities from Southern Trench, Guaymas Basin, Mexico - 4870-07-1--2_MG	DOE Joint Genome Institute (JGI)		SAMN08777171	SRX3982095	Illumina HiSeq 2500-1TB	1999	Mexico: Guaymas Basin	Cathedral Hill gradient site area, sediment	27.0114	-110.593	2016/12/22	295641287	602278	yes
3300003876	Ga0063039	Black smoker hydrothermal chimney microbial communities from Manus Basin, Bismarck Sea	Black smoker hydrothermal chimney microbial communities from Manus Basin, Bismarck Sea - 373A	Max Planck Institute for Marine Microbiology				Illumina MiSeq			Black smoker hydrothermal chimney				143175104	188890	no
8023679297	Ga0606356	Hydrothermal plume microbial communities from Tui Malila hydrothermal field, Lau Basin, Pacific Ocean	Campylobacterales bacterium UWMA-0117	University of Michigan											1340452	1456	no
3300028821	Ga0310051	Axial Seamount Reassemblies	Diffuse hydrothermal flow volcanic vent microbial communities from Axial Seamount, northeast Pacific ocean - Sample FS908_Marker33_DNA IDBA_UD reassembly	Marine Biological Laboratory				Illumina HiSeq 1000	1516	North Pacific Ocean: Axial Seamount	Marker 33 diffuse flow vent, Axial Seamount	45.9332	-129.982	2014/8	226318478	510325	yes
2728369294	Ga0180911	Deep subsurface and oceanic microbial communities from Witwatersrand Basin, South Africa, and the Canadian and Fennoscandian shields and at the Lost City Hydrothermal Field	Methanothermococcus sp. JdFR-03	DOE Joint Genome Institute (JGI)											1476247	1617	no
3300011091	Ga0151397	Diffuse hydrothermal flow volcanic vent microbial communities from Axial Seamount, northeast Pacific Ocean	Diffuse hydrothermal flow volcanic vent microbial communities from Axial Seamount, northeast Pacific ocean - Sample FS907_80_13H6 reanalysis	Marine Biological Laboratory				Illumina HiSeq 1000	1542	Northeast Pacific Ocean: Anemone vent, Axial Seamount	Anemone diffuse flow vent, Axial seamount	45.933	-130.014		1191941	3271	no
2836447438	Ga0400574	Hydrothermal Fe-rich Mat Reference Genomes	Unclassified Zetaproteobacteria bacterium 664-SC8_FULL_No.5_1.7_84	University of Delaware											2294420	2579	no
2836486495	Ga0400610	Hydrothermal Fe-rich Mat Reference Genomes	Unclassified Zetaproteobacteria bacterium 667-BS4_FULL_No.20_0.8_23	University of Delaware											340612	435	no
3300009485	Ga0118758	Microbial community analysis of hydrothermal vent diffuse flow samples from Mid-Cayman Rise, Pacific Ocean	Microbial community analysis of hydrothermal vent diffuse flow samples from Mid-Cayman Rise, Pacific Ocean - FS877 no min length	Marine Biological Laboratory				Illumina HiSeq	2304	Mid Cayman Rise	diffuse flow from Shrimp Buttery, Von Damm, Mid Cayman Rise	18.377	-81.798	2013/6/27	194341827	887044	no
3300021563	Ga0190353	Microbial communities from sediments and microbial mats in various locations	Hydrothermal vent microbial mat bacterial communities from Southern Trench, Guaymas Basin, Mexico - 4872-13-11-12_MG	DOE Joint Genome Institute (JGI)		SAMN08777290	SRX3982314	Illumina HiSeq 2500-1TB	2011	Mexico: Guaymas Basin	Cathedral Hill gradient site, white microbial mat	27.0114	-110.596	2016/12/24	35541007	102672	yes
3300038346	Ga0134513	Deep-sea hydrothermal vent sediment bacterial and viral communities from Southwest Indian Ocean	Deep-sea hydrothermal vent sediment bacterial and viral communities from Southwest Indian Ocean - SWIR-S004-M	Zhejiang University		SAMN04447724	SRX1552773	Illumina HiSeq 2000		Indian Ocean	deep-sea hydrothermal vent sediment	-27.85	63.94		7680857	19961	no
2616644903	Ga0072709	Hydrothermal vent microbial communities from Crab Spa hydrothermal vent, East Pacific Rise	Thermotogae bacterium SCGC AD-702-D06 (contamination screened)	Bigelow Laboratory Single Cell Genomics Center (SCGC)				Illumina		Pacific Ocean: East Pacific Rise, Crab Spa		9.83997	-104.294		1610077	1582	no
2893482262	Ga0454288	Hydrothermal Fe-rich Mat Reference Genomes	Unclassified Marinimicrobia bacterium S6_FULL_No.1_2.3_96	University of Delaware											1929546	1924	no
2616644873	Ga0072665	Hydrothermal vent microbial communities from Crab Spa hydrothermal vent, East Pacific Rise	Campylobacteriales bacterium SCGC AD-133-F21 (contamination screened)	Bigelow Laboratory Single Cell Genomics Center (SCGC)				Illumina		Pacific Ocean: East Pacific Rise, Crab Spa		9.83997	-104.294		365423	416	no
3300026544	Ga0256827	Marine microbial communities from hydrothermal vents in the Atlantic and Pacific Ocean	Hydrothermal vent microbial communities from East Pacific Rise, Pacific Ocean - CV84	DOE Joint Genome Institute (JGI)		SAMN09094695	SRX4801560	Illumina HiSeq 2500-1TB	2511	Pacific Ocean: East Pacific Rise	Experimental microbial colonizer placed at the East Pacific Rise	9.8441	-104.297	2014/11/15	741067616	1466353	no
3300021471	Ga0190359	Microbial communities from sediments and microbial mats in various locations	Hydrothermal vent microbial mat bacterial communities from Southern Trench, Guaymas Basin, Mexico - 4872-18-2-3_MG	DOE Joint Genome Institute (JGI)		SAMN08777289	SRX3982321	Illumina HiSeq 2500-1TB	2011	Mexico: Guaymas Basin	Cathedral Hill gradient site, white microbial mat	27.0114	-110.596	2016/12/24	591576850	1186311	yes
2836491939	Ga0400614	Hydrothermal Fe-rich Mat Reference Genomes	Unclassified Zetaproteobacteria bacterium S7_FULL_No.4_4.9_57	University of Delaware											1157809	1380	no
2836558174	Ga0400673	Hydrothermal Fe-rich Mat Reference Genomes	Unclassified Zetaproteobacteria bacterium 482-BS8_FULL_No.5_1.3_8	Western Washington University											115782	144	no
2836477973	Ga0400600	Hydrothermal Fe-rich Mat Reference Genomes	Unclassified Zetaproteobacteria bacterium 667-BS4_FULL_No.11_2.4_56	University of Delaware											921065	1008	no
3300048878	Ga0496647	Hydrothermal vents viral and microbial communities from various locations in Pacific Ocean	Hydrothermal vent plume microbial communities from North Pacific Ocean - CTD-AT42-06-009-32m-0.1	DOE Joint Genome Institute (JGI)		SAMN51147164	SRX30607114	Illumina NovaSeq S4	2473	North Pacific Ocean	Pelagic ocean, hydrothermal vent plume	9.83899	-104.291	2018/12/12	127215680	240851	no
3300003742	Ga0062515	Diffuse hydrothermal flow volcanic vent microbial communities from Axial Seamount, northeast Pacific Ocean	Diffuse hydrothermal flow volcanic vent microbial communities from Axial Seamount, northeast Pacific ocean - Sample FS904_80_13L	The Marine Biological Laboratory				Illumina HiSeq 1000	1516	Marker 33 diffuse flow vent, Axial Seamount	Marker 33 diffuse flow vent, Axial Seamount	45.9332	-129.982		1474619	4825	yes
3300006607	Ga0101495	Diffuse hydrothermal flow volcanic vent microbial communities from Axial Seamount, northeast Pacific Ocean	Diffuse hydrothermal flow volcanic vent microbial communities from Axial Seamount, northeast Pacific ocean - Sample FS891_Anemone_RNA	The Marine Biological Laboratory				Illumina	1542	North Pacific Ocean: Axial Seamount	Anemone diffuse flow vent, Axial seamount	45.9332	-130.014		3434303	12044	no
2728369337	Ga0180870	Deep subsurface and oceanic microbial communities from Witwatersrand Basin, South Africa, and the Canadian and Fennoscandian shields and at the Lost City Hydrothermal Field	Archaeoglobus sp. JdFR-30	DOE Joint Genome Institute (JGI)											1100408	1274	no
3300028534	Ga0256843	Marine microbial communities from hydrothermal vents in the Atlantic and Pacific Ocean	Pompeii worm associated microbial communities from hydrothermal vent at the East Pacific Rise, Pacific Ocean - Alvinella	DOE Joint Genome Institute (JGI)		SAMN10350719	SRX5246602	Illumina HiSeq 2500-1TB	2503	Pacific Ocean: East Pacific Rise	Scraping of Alvinella pompejana	9.8416	-104.292	2014/11/8	584750284	1130233	yes
2836516342	Ga0400633	Hydrothermal Fe-rich Mat Reference Genomes	Unclassified Zetaproteobacteria bacterium 479-BS4_FULL_No.3_3.6_69	Western Washington University											1549490	1665	no
3300005096	Ga0072503	Hydrothermal chimney in EPR	Hydrothermal chimney microbial communities from the East Pacific Rise - M vent 7	Beijing Genomics Institute (BGI)						East Pacific Rise	East Pacific Rise				592184781	595139	yes
3300010910	Ga0137522	Diffuse hydrothermal flow volcanic vent microbial communities from Axial Seamount, northeast Pacific Ocean	Diffuse hydrothermal flow volcanic vent microbial communities from Axial Seamount, northeast Pacific ocean - Sample LVWS6_30_TP1_13H	Marine Biological Laboratory				Illumina HiSeq 1000	1516	Marker 33, Axial Seamount, Northeast Pacific Ocean	Marker 33 diffuse flow vent, Axial Seamount	45.9332	-129.982	2014/8	1700624	3663	no
3300013795	Ga0180408	Microbial community analysis of hydrothermal vent diffuse flow samples from Mid-Cayman Rise, Pacific Ocean	Microbial community analysis of hydrothermal vent diffuse flow samples from Mid-Cayman Rise, Pacific Ocean - FS854 IDBA reassembly	Marine Biological Laboratory				Illumina HiSeq		Mid-Cayman Rise	diffuse flow fluid, FS854, Piccard, Mid-Cayman Rise			2012	185075677	235925	no
2772190973	Ga0261696	Hydrothermal Fe-rich Mat Reference Genomes	Unclassified Zetaproteobacteria bacterium S6_FULL_No.1_5.2_98	University of Delaware											2650827	2488	no
3300034737	Ga0376872	Filamentous streamer microbial communities from Yellowstone Lake hydrothermal vents, YNP, Wyoming, USA	Filamentous streamer microbial communities from Yellowstone Lake hydrothermal vent, YNP, Wyoming, USA - 2016_B01	Marine Biological Laboratory				Illumina		Yellowstone National Park, Wyoming, USA	Yellowstone Lake hydrothermal vent	44.5081	-110.357	2016/8	52260034	68869	yes
2836500517	Ga0400624	Hydrothermal Fe-rich Mat Reference Genomes	Unclassified Zetaproteobacteria bacterium S9_FULL_No.1_63.0_53	University of Delaware											1264137	1577	no
3300010915	Ga0137769	Diffuse hydrothermal flow volcanic vent microbial communities from Axial Seamount, northeast Pacific Ocean	Diffuse hydrothermal flow volcanic vent microbial communities from Axial Seamount, northeast Pacific ocean - Sample FS917_55_12C_TP1_INC3_9	Marine Biological Laboratory				Illumina HiSeq 1000	1516	Marker 33, Axial Seamount, Northeast Pacific Ocean	Marker 33 diffuse flow vent, Axial Seamount	45.9332	-129.982	2015/8	2901246	4844	no
3300021590	Ga0190354	Microbial communities from sediments and microbial mats in various locations	Hydrothermal vent microbial mat bacterial communities from Southern Trench, Guaymas Basin, Mexico - 4872-13-12-13_MG	DOE Joint Genome Institute (JGI)		SAMN08779105	SRX3982315	Illumina HiSeq 2500-1TB	2011	Mexico: Guaymas Basin	Cathedral Hill gradient site, white microbial mat	27.0114	-110.596	2016/12/24	121224396	291648	yes
3300003743	Ga0062512	Diffuse hydrothermal flow volcanic vent microbial communities from Axial Seamount, northeast Pacific Ocean	Diffuse hydrothermal flow volcanic vent microbial communities from Axial Seamount, northeast Pacific ocean - Sample FS904_80_12H	Marine Biological Laboratory				Illumina HiSeq 1000	1516	Marker 33 diffuse flow vent, Axial Seamount	Marker 33 diffuse flow vent, Axial Seamount	45.9332	-129.982		1875723	5614	yes
2836436275	Ga0400566	Hydrothermal Fe-rich Mat Reference Genomes	Unclassified Zetaproteobacteria bacterium 664-BS3_FULL_No.5_0.7_21	University of Delaware											808519	905	no
2728369334	Ga0180876	Deep subsurface and oceanic microbial communities from Witwatersrand Basin, South Africa, and the Canadian and Fennoscandian shields and at the Lost City Hydrothermal Field	Thermococcus sp. JdFR-02	DOE Joint Genome Institute (JGI)											2362347	2677	no
3300001552	Ga0012492	Hydrothermal vent plume microbial communities from the Cayman RIse, Caribbean Sea	Hydrothermal vent plume microbial communities from the Cayman RIse, Caribbean Sea - Cayman Deep_MG2b					Illumina HiSeq 2000	4953	Mid Cayman Rise, Caribbean Sea	Mid Cayman Rise, Caribbean Sea	18.3763	-81.7891	2012/1/25	1750425	1803	no
3300039036	Ga0243140	Sediment and seawater microbial communities from hydrothermal vent in Taiwan, China	Seawater microbial communities from hydrothermal vent in Taiwan, China - W1	Xiamen University		SAMN06199459	SRX2538514	Illumina HiSeq 2500	15	China: Taiwan	coastal water body	24.8341	121.962	2015/5/26	80381928	143040	no
3300005787	Ga0079397	Diffuse hydrothermal flow volcanic vent microbial communities from Axial Seamount, northeast Pacific Ocean	Diffuse hydrothermal flow volcanic vent microbial communities from Axial Seamount, northeast Pacific ocean - Sample FS903_Marker113_DNA	The Marine Biological Laboratory				Illumina	1522	North Pacific Ocean: Axial Seamount	Marker 113 diffuse flow vent, Axial Seamount	45.9227	-129.988		5625083	7668	no
2836411989	Ga0400548	Hydrothermal Fe-rich Mat Reference Genomes	Unclassified Zetaproteobacteria bacterium S19_FULL_No.12_0.5_25	University of Delaware											1105663	1350	no
2616644872	Ga0072664	Hydrothermal vent microbial communities from Crab Spa hydrothermal vent, East Pacific Rise	Sulfurovum sp. SCGC AD-133-F15 (contamination screened)	Bigelow Laboratory Single Cell Genomics Center (SCGC)				Illumina		Pacific Ocean: East Pacific Rise, Crab Spa		9.83997	-104.294		805653	844	no
3300005098	Ga0072683	Hydrothermal sediment in Guaymas	Hydrothermal sediment microbial communities from the Guaymas Basin, Gulf of California, Pacific Ocean - 8, 4-6cmbsf	Beijing Genomics Institute (BGI)						Guaymas Basin	Guaymas Basin				202792850	212196	no
3300021511	Ga0190284	Microbial communities from sediments and microbial mats in various locations	Hydrothermal vent microbial mat bacterial communities from Southern Trench, Guaymas Basin, Mexico - 4869-18-1-2_MG	DOE Joint Genome Institute (JGI)		SAMN08779063	SRX3982092	Illumina HiSeq 2500-1TB	2001	Mexico: Guaymas Basin	Ultra Mound gradient site, orange microbial mat	27.0074	-110.591	2016/12/21	303118174	607177	no
3300039031	Ga0436820	Tubeworm-associated microbial communities from Endeavour hydrothermal vents, Juan de Fuca Ridge, Canada	Tubeworm-associated microbial communities from Endeavour hydrothermal vents, Juan de Fuca Ridge, Canada - low-flow bush EMw2	Dalhousie University				Illumina NextSeq 550	2188	Juan de Fuca Ridge, NE Pacific, Canada	Base of tubeworm bush	47.9501	-129.096	2016/8	710743238	1543105	no
2836482984	Ga0400605	Hydrothermal Fe-rich Mat Reference Genomes	Unclassified Zetaproteobacteria bacterium 667-BS4_FULL_No.16_1.3_8	University of Delaware											123025	182	no
3300000098	Ga0011202	Marine microbial communities from a deep-sea hydrothermal vent at Loihi Seamount, Hawaii	Marine microbial communities from hydrothermal vents at Loihi seamountain, Hawaii	Pennsylvania State University				454 GS FLX Titanium	5000	Loihi, Hawaii	Biomats	18.92	-155.27	2005/1/1	19923105	50316	no
3300039269	Ga0438746	Tubeworm-associated microbial communities from Endeavour hydrothermal vents, Juan de Fuca Ridge, Canada	Tubeworm-associated microbial communities from Endeavour hydrothermal vents, Juan de Fuca Ridge, Canada - diffuse fluids ECf9	Dalhousie University				Illumina NextSeq 550	2183	Juan de Fuca Ridge, NE Pacific	Fluids venting through tubeworm assemblage	47.963	-129.091	2016/8	563944187	1195480	no
3300027985	Ga0259481	Black smoker hydrothermal vent sediment microbial communities from the Guaymas Basin, Mid-Atlantic Ridge, South Atlantic Ocean	Black smoker hydrothermal vent sediment microbial communities from the Guaymas Basin, Mid-Atlantic Ridge, South Atlantic Ocean - BSmoChi-MAR-TVG12	Beijing Genomics Institute (BGI)				Illumina HiSeq X Ten		Mid-Atlantic Ridge, South Atlantic Ocean	Mid-Atlantic Ridge, South Atlantic Ocean	-15.16	-13.35	2012/8	2983016757	3591198	no
3300048742	Ga0496910	Hydrothermal vents viral and microbial communities from various locations in Pacific Ocean	Metatranscriptome of hydrothermal vent fluid microbial communities from North Pacific Ocean - A5006-deckB (Metagenome Metatranscriptome)	DOE Joint Genome Institute (JGI)		SAMN52640053	SRX30974588	Illumina NovaSeq S4	2516	North Pacific Ocean	Pelagic ocean, hydrothermal vent fluid	9.838	-104.291	2018/12/10	36197580	82255	no
3300050942	Ga0504820	Sorted cell/s from hydrothermal vent fluid, Lost City Hydrothermal field, North Atlantic Ocean	Sorted cell/s from hydrothermal vent fluid, Lost City Hydrothermal field, North Atlantic Ocean - AH-956-G04	DOE Joint Genome Institute (JGI)		SAMN49219422	SRX29504550	Illumina NovaSeq S4		North Atlantic Ocean	hydrothermal vent fluid	30.1197	-42.1244	2018/9/21	1555959	1633	no
3300041959	Ga0456189	Diffuse hydrothermal flow volcanic vent microbial communities from Axial Seamount, northeast Pacific Ocean	Diffuse hydrothermal flow volcanic vent microbial communities from Axial Seamount, northeast Pacific ocean - Sample FS906_Marker113_DNA SE_2020	Marine Biological Laboratory				Illumina HiSeq 1000	1522	North Pacific Ocean: Axial Seamount	Marker 113 diffuse flow vent, Axial Seamount	45.9227	-129.988	2014/8	223476790	438339	yes
2728369297	Ga0180892	Deep subsurface and oceanic microbial communities from Witwatersrand Basin, South Africa, and the Canadian and Fennoscandian shields and at the Lost City Hydrothermal Field	Candidatus Geothermarchaeota archaeon JdFR-14	DOE Joint Genome Institute (JGI)											1635024	1714	no
3300042077	Ga0451316	Mollusc gills microbial communities from various hydrothermal vent in Atlantic Ocean	Mollusc gills microbial communities from Clueless hydrothermal vent, Atlantic Ocean - BspSym_Cl_4_11-5	Max Planck Institute for Marine Microbiology		SAMEA5664333	ERX3367182	Illumina HiSeq 2500	2972	South Atlantic Ocean	mollusc gills	-4.80327	-12.3718	2009/4/22	528054072	554543	no
3300022188	Ga0190313	Microbial communities from sediments and microbial mats in various locations	Hydrothermal vent sediment bacterial communities from Southern Trench, Guaymas Basin, Mexico - 4870-07-10-11_MG	DOE Joint Genome Institute (JGI)		SAMN08776767	SRX3982197	Illumina HiSeq 2500-1TB	1999	Mexico: Guaymas Basin	Cathedral Hill gradient site area, sediment	27.0114	-110.593	2016/12/22	369060282	766490	yes
3300048645	Ga0496646	Hydrothermal vents viral and microbial communities from various locations in Pacific Ocean	Hydrothermal vent plume microbial communities from North Pacific Ocean - CTD-AT42-06-005-500m-0.1	DOE Joint Genome Institute (JGI)		SAMN51147511	SRX30607115	Illumina NovaSeq S4	500	North Pacific Ocean	Pelagic ocean, hydrothermal vent plume	8.41285	-104.419	2018/12/6	508726016	836983	yes
3300039229	Ga0438692	Tubeworm-associated microbial communities from Endeavour hydrothermal vents, Juan de Fuca Ridge, Canada	Tubeworm-associated microbial communities from Endeavour hydrothermal vents, Juan de Fuca Ridge, Canada - high-flow bush EMw4	Dalhousie University				Illumina NextSeq 550	2197	Juan de Fuca Ridge, NE Pacific, Canada	Base of tubeworm bush	47.95	-129.097	2016/8	793032311	1516564	yes
2616644902	Ga0072708	Hydrothermal vent microbial communities from Crab Spa hydrothermal vent, East Pacific Rise	Thioreductor sp. SCGC AD-702-C13 (contamination screened)	Bigelow Laboratory Single Cell Genomics Center (SCGC)				Illumina		Pacific Ocean: East Pacific Rise, Crab Spa		9.83997	-104.294		960946	1069	no
3300021791	Ga0226832	Characterization of microbial community from Mariana Back Arc	Hydrothermal fluids microbial communities from Mariana Back-Arc Basin vent fields, Pacific Ocean - Daikoku_FS921 150_kmer	Marine Biological Laboratory				Illumina NextSeq	409.13	Daikoku vent field, Mariana back arc basin	Daikoku vent field	21.3251	144.192	2016/12/3	753242140	1662468	no
3300048640	Ga0496638	Hydrothermal vents viral and microbial communities from various locations in Pacific Ocean	Hydrothermal vent plume microbial communities from North Pacific Ocean - CTD-AT42-06-009-32m-0.65	DOE Joint Genome Institute (JGI)		SAMN51146643	SRX30607106	Illumina NovaSeq S4	2473	North Pacific Ocean	Pelagic ocean, hydrothermal vent plume	9.83899	-104.291	2018/12/12	625930178	1056952	no
3300010890	Ga0137530	Diffuse hydrothermal flow volcanic vent microbial communities from Axial Seamount, northeast Pacific Ocean	Diffuse hydrothermal flow volcanic vent microbial communities from Axial Seamount, northeast Pacific ocean - Sample LVWS6_55_TP2_12H	Marine Biological Laboratory				Illumina HiSeq 1000	1516	Marker 33, Axial Seamount, Northeast Pacific Ocean	Marker 33 diffuse flow vent, Axial Seamount	45.9332	-129.982	2014/8	230911	633	no
3300021484	Ga0190345	Microbial communities from sediments and microbial mats in various locations	Hydrothermal vent microbial mat bacterial communities from Southern Trench, Guaymas Basin, Mexico - 4872-13-3-4_MG	DOE Joint Genome Institute (JGI)		SAMN08779246	SRX3982299	Illumina HiSeq 2500-1TB	2011	Mexico: Guaymas Basin	Cathedral Hill gradient site, white microbial mat	27.0114	-110.596	2016/12/24	106167820	214538	no
3001783776	Ga0520458	Microbial community from the Prony Hydrothermal Field and related strains: Genome sequencing and assembly	Alkaliphilus sp. B6464	Mediterranean Institute of Oceanography (MIO)		SAMN14689425		Oxford Nanopore GridION, Illumina HiSeq		New Caledonia: Prony Bay, Bain des Japonais		-22.2995	166.862		3862939	4220	no
8060999488	Ga0176272	Genome sequencing of cellulolytic heat tolerant Bacillus isolates from Yellowstone National Park hydrothermal-vegetative environments	Bacillus licheniformis YNP5-TSU	Tennessee State University		SAMN05560547	SRX2019002	Illumina HiSeq 3000	0.04	USA: Yellowstone National Park, Wyoming		44.7803	-110.698		4536032	5083	no
3300048887	Ga0496672	Hydrothermal vents viral and microbial communities from various locations in Pacific Ocean	Hydrothermal vent plume microbial communities from Gulf of California, Mexico - CTD-FK190211-01-2006m-0.1-B	DOE Joint Genome Institute (JGI)		SAMN51148545	SRX30607574	Illumina NovaSeq S4	2006	Mexico: Gulf of California	Pelagic ocean, hydrothermal vent plume	27.0013	-111.412	2019/2/26	466749461	731932	yes
3300001554	Ga0012534	Hydrothermal vent plume microbial communities from the Cayman RIse, Caribbean Sea	Hydrothermal vent plume microbial communities from the Cayman RIse, Caribbean Sea - Cayman Shallow_MG2b					Illumina HiSeq 2000	2000	Von Damm hydrothermal vent, Caribbean Sea	Von Damm hydrothermal vent, Caribbean Sea	18.3763	-81.7891		2854089	3516	no
2166559002	Ga0010950	Marine microbial communities from a deep-sea hydrothermal vent at Loihi Seamount, Hawaii	Marine microbial communities from hydrothermal vents at Loihi seamountain, Hawaii	Pennsylvania State University				454 GS FLX Titanium	5000	Loihi Seamount, Hawaii	Biomats	18.47	-155.18	2005/7/1	5271679	7061	no
2728369332	Ga0180934	Deep subsurface and oceanic microbial communities from Witwatersrand Basin, South Africa, and the Canadian and Fennoscandian shields and at the Lost City Hydrothermal Field	Archaeoglobus sp. JdFR-29	DOE Joint Genome Institute (JGI)											737977	965	no
3300009429	Ga0120406	Microbial community analysis of hydrothermal vent diffuse flow samples from Mid-Cayman Rise, Pacific Ocean	Microbial community analysis of hydrothermal vent diffuse flow samples from Mid-Cayman Rise, Pacific Ocean - FS844 no min length	Marine Biological Laboratory				Illumina MiSeq	2376	Mid-Cayman Rise	diffuse flow fluid	18.3747	-81.7973	2012/1/17	791626083	2953297	yes
3300050939	Ga0504817	Sorted cell/s from hydrothermal vent fluid, Lost City Hydrothermal field, North Atlantic Ocean	Sorted cell/s from hydrothermal vent fluid, Lost City Hydrothermal field, North Atlantic Ocean - AH-956-E02	DOE Joint Genome Institute (JGI)		SAMN49208305	SRX29504549	Illumina NovaSeq S4		North Atlantic Ocean	hydrothermal vent fluid	30.1197	-42.1244	2018/9/21	661876	630	no
3300049905	Ga0496597	Hydrothermal vents viral and microbial communities from various locations in Pacific Ocean	Hydrothermal vent plume viral communities from North Pacific Ocean - CTD009 v	DOE Joint Genome Institute (JGI)		SAMN51149014	SRX30589625	Illumina NovaSeq S4	2473	North Pacific Ocean	Pelagic ocean, hydrothermal vent plume	9.839	-104.291	2018/12/13	124333907	288553	no
2616644874	Ga0072666	Hydrothermal vent microbial communities from Crab Spa hydrothermal vent, East Pacific Rise	Sulfurovum sp. SCGC AD-133-G07 (contamination screened)	Bigelow Laboratory Single Cell Genomics Center (SCGC)				Illumina		Pacific Ocean: East Pacific Rise, Crab Spa		9.83997	-104.294		229121	266	no
3300008789	Ga0103689	Microbial communities of hydrothermal vent plumes from the Guaymas Basin in the Gulf of California	Microbial communities of hydrothermal vent plumes from the Guaymas Basin in the Gulf of California - Background GD7i	University of Michigan		SAMN00847557	SRX134769	Illumina HiSeq 2000		Guaymas Basin in the Gulf of California	Hydrothermal vent in Guaymas Basin in the Gulf of California				29233890	126882	no
3300049900	Ga0496609	Hydrothermal vents viral and microbial communities from various locations in Pacific Ocean	Hydrothermal vent plume viral communities from Gulf of California, Mexico - CTD-FK190211-01-585m-0.03 v	DOE Joint Genome Institute (JGI)		SAMN51146293	SRX30589753	Illumina NovaSeq S4	585	Mexico: Gulf of California	Pelagic ocean, hydrothermal vent plume	27.0013	-111.412	2019/2/26	46448297	136660	no
3300006079	Ga0081601	Microbial communities in diffuse hydrothermal fluids of Manus Basin, Bismarck Sea	Microbial communities in diffuse hydrothermal fluids of Manus Basin, Bismarck Sea - fluid D	Max Planck Institute for Plant Breeding Research						Manus Basin, Bismarck Sea	diffuse hydrothermal fluid	-3.7283	151.672		325976007	598534	no
2836536012	Ga0400648	Hydrothermal Fe-rich Mat Reference Genomes	Unclassified Zetaproteobacteria bacterium 481-BS4_FULL_No.4_2.0_96	Western Washington University											3548581	3295	no
2816332586	Ga0177722	Genome sequencing of cellulolytic heat tolerant Bacillus isolates from Yellowstone National Park hydrothermal-vegetative environments	Bacillus altitudinis YNP4-TSU	Tennessee State University		SAMN05560546	SRX2019001	Illumina HiSeq 3000	0.04	USA: Yellowstone National Park, Wyoming		44.7802	-110.698		3741716	3900	no
2728369315	Ga0180859	Deep subsurface and oceanic microbial communities from Witwatersrand Basin, South Africa, and the Canadian and Fennoscandian shields and at the Lost City Hydrothermal Field	Methanopyri archaeon JdFR-15	DOE Joint Genome Institute (JGI)											207909	272	no
2582581272	Ga0008258	Genomic Encyclopedia of Type Strains, Phase I: the one thousand microbial genomes (KMG-I) project	Thermomonas hydrothermalis DSM 14834	DOE Joint Genome Institute (JGI)		SAMN02745204	SRX2066077	Illumina HiSeq 2500		Portugal	Hot spring Portugal isolation date: April, 1998				2448719	2373	no
3300039094	Ga0243149	Sediment and seawater microbial communities from hydrothermal vent in Taiwan, China	Seawater microbial communities from hydrothermal vent in Taiwan, China - Y1	Xiamen University		SAMN06199455	SRX2538518	Illumina HiSeq 2500	8	China: Taiwan	coastal water body	24.835	121.962	2015/5/26	31699152	61970	no
3300023548	Ga0256727	Hydrothermal Fe-rich Mat Reference Genomes	Hydrothermal Fe-rich mat microbial community from Loihi Seamount, Hawaii, USA - 677-SSYellow	University of Delaware				Illumina HiSeq 2500	1271.23	USA: Loihi Seamount, Hawaii	Hiolo South (Marker #34)	18.9056	-155.257	2013/3/31	272241056	402483	no
2728369310	Ga0180904	Deep subsurface and oceanic microbial communities from Witwatersrand Basin, South Africa, and the Canadian and Fennoscandian shields and at the Lost City Hydrothermal Field	Archaeoglobus sp. JdFR-22	DOE Joint Genome Institute (JGI)											2062531	2373	no
3300028817	Ga0310048	Axial Seamount Reassemblies	Marine deep subsurface microbial communities from hydrothermal vents in Axial Seamount, Pacific Ocean - FS903_Marker113_DNA IDBA_UD reassembly	The Marine Biological Laboratory		SAMEA3143263	ERX639190, ERX639192, ERX639188, ERX639193, ERX639189, ERX639191, ERX639187	Illumina HiSeq 1000		Pacific Ocean: Axial Seamount	Low temperature diffuse fluid vents	45.9227	-129.988	2013	151877137	361168	no
3300048883	Ga0496665	Hydrothermal vents viral and microbial communities from various locations in Pacific Ocean	Hydrothermal vent plume microbial communities from Gulf of California, Mexico - CTD-FK190211-14-1990m-0.1	DOE Joint Genome Institute (JGI)		SAMN51146917	SRX30607432	Illumina NovaSeq S4	1990	Mexico: Gulf of California	Pelagic ocean, hydrothermal vent plume	27.0131	-111.405	2019/3/5	499543625	781784	yes
2836463860	Ga0400588	Hydrothermal Fe-rich Mat Reference Genomes	Unclassified Zetaproteobacteria bacterium 665-MMA12_FULL_No.8_1.5_13	University of Delaware											248560	306	no
3300048744	Ga0496913	Hydrothermal vents viral and microbial communities from various locations in Pacific Ocean	Metatranscriptome of hydrothermal vent plume microbial communities from North Pacific Ocean - CTD-AT42-06-008-2490m-0.65 (Metagenome Metatranscriptome)	DOE Joint Genome Institute (JGI)		SAMN52641316	SRX30974591	Illumina NovaSeq S4	2490	North Pacific Ocean	Pelagic ocean, hydrothermal vent plume	9.83807	-104.291	2018/12/12	133388662	308546	yes
3300019380	Ga0197326	Microbial community analysis of hydrothermal vent diffuse flow samples from Mid-Cayman Rise, Pacific Ocean	Microbial community analysis of hydrothermal vent diffuse flow samples from Mid-Cayman Rise, Pacific Ocean - FS848 IDBA reassembly renamed	Marine Biological Laboratory				Illumina MiSeq	2308	Mid-Cayman Rise	hydrothermal vent diffuse flow fluids	18.3769	-81.7979	2012/1/19	48114812	64539	no
3300019451	Ga0193923	Microbial communities from sediments and microbial mats in various locations	Sorted cell/s from Southern Trench hydrothermal vent microbial mat, Guaymas Basin, Mexico - 6L_4868_03_06	DOE Joint Genome Institute (JGI)		SAMN08779207	SRX3974058	Illumina NextSeq-HO	2002	Mexico: Guaymas Basin	hydrothermal vent white microbial mat from Ultra Mound, Coring site 2	27.001	-110.6	2016/12/19	16396887	16913	no
3300002585	Ga0041818	Diffuse hydrothermal flow volcanic vent microbial communities from Axial Seamount, northeast Pacific Ocean	Diffuse hydrothermal flow volcanic vent microbial communities from Axial Seamount, northeast Pacific ocean - Sample FS903_55_13L	The Marine Biological Laboratory					1522	Northeast Pacific Ocean	Northeast Pacific Ocean	45.9227	-129.988		873177	3044	no
3300050944	Ga0504822	Sorted cell/s from hydrothermal vent fluid, Lost City Hydrothermal field, North Atlantic Ocean	Sorted cell/s from hydrothermal vent fluid, Lost City Hydrothermal field, North Atlantic Ocean - AH-956-I03	DOE Joint Genome Institute (JGI)		SAMN49208300	SRX29505293	Illumina NovaSeq S4		North Atlantic Ocean	hydrothermal vent fluid	30.1197	-42.1244	2018/9/21	529936	641	no
3300007729	Ga0105666	Diffuse hydrothermal flow volcanic vent microbial communities from Axial Seamount, northeast Pacific Ocean	Diffuse hydrothermal flow volcanic vent microbial communities from Axial Seamount, northeast Pacific ocean - Sample CTDBack_2015_RNA CLC_assembly	Marine Biological Laboratory				Illumina NextSeq	1500	Northeast Pacific Ocean	Northeast Pacific Ocean	45.9372	-130.082	2015/8/15	6797101	12733	yes
3300019385	Ga0193931	Microbial communities from sediments and microbial mats in various locations	Sorted cell/s from Southern Trench hydrothermal vent sediment, Guaymas Basin, Mexico - 6W_4868_13_30	DOE Joint Genome Institute (JGI)		SAMN08776881	SRX3974125	Illumina NextSeq-HO	2002	Mexico: Guaymas Basin	hydrothermal vent brown sediment near microbial mat from Ultra Mound, Coring site 2, gradient	27.001	-110.6	2016/12/19	554588	667	no
2616644888	Ga0072694	Hydrothermal vent microbial communities from Crab Spa hydrothermal vent, East Pacific Rise	Halomonas sp. SCGC AD-687-O20 (contamination screened)	Bigelow Laboratory Single Cell Genomics Center (SCGC)				Illumina		Pacific Ocean: East Pacific Rise, Crab Spa		9.83997	-104.294		620301	643	no
3300019456	Ga0193928	Microbial communities from sediments and microbial mats in various locations	Sorted cell/s from Southern Trench hydrothermal vent sediment, Guaymas Basin, Mexico - 6S_4868_13_24	DOE Joint Genome Institute (JGI)		SAMN08776882	SRX3974129	Illumina NextSeq-HO	2002	Mexico: Guaymas Basin	hydrothermal vent brown sediment near microbial mat from Ultra Mound, Coring site 2, gradient	27.001	-110.6	2016/12/19	23301559	25930	no
3300019449	Ga0193927	Microbial communities from sediments and microbial mats in various locations	Sorted cell/s from Southern Trench hydrothermal vent sediment, Guaymas Basin, Mexico - 6R_4868_13_15	DOE Joint Genome Institute (JGI)		SAMN08778858	SRX3974128	Illumina NextSeq-HO	2002	Mexico: Guaymas Basin	hydrothermal vent brown sediment near microbial mat from Ultra Mound, Coring site 2, gradient	27.001	-110.6	2016/12/19	12725759	12131	no
3300038378	Ga0434943	Diffuse flow microbial communities from hydrothermal vent near Loihi Seamount, Hawaii, USA	Diffuse flow microbial communities from hydrothermal vent near Loihi Seamount, Hawaii, USA - 71	The Marine Biological Laboratory				Illumina NextSeq	1000.000000 to 1200.000000	USA: Loihi Seamount, Hawaii	Diffuse flow from hydrothermal vent	18.92	-155.27	2018/8	37151691	53159	no
3300005746	Ga0077124	Microbial community analysis of hydrothermal vent diffuse flow samples from Mid-Cayman Rise, Pacific Ocean	Microbial community analysis of hydrothermal vent diffuse flow samples from Mid-Cayman Rise, Pacific Ocean - FS848	Marine Biological Laboratory				Illumina MiSeq	2308	Mid-Cayman Rise	hydrothermal vent diffuse flow fluids	18.3769	-81.7979	2012/1/19	14754474	19942	no
3300021482	Ga0190333	Microbial communities from sediments and microbial mats in various locations	Hydrothermal vent sediment bacterial communities from Southern Trench, Guaymas Basin, Mexico - 4872-04-6-7_MG	DOE Joint Genome Institute (JGI)		SAMN08776765	SRX3982248	Illumina HiSeq 2500-1TB	2011	Mexico: Guaymas Basin	Cathedral Hill gradient site, bare sediment just outside mat	27.0114	-110.596	2016/12/24	104314933	219294	yes
3300014662	Ga0134510	Deep-sea hydrothermal vent sediment bacterial and viral communities from Southwest Indian Ocean	Deep-sea hydrothermal vent sediment bacterial and viral communities from Southwest Indian Ocean - SWIR-S021-V	Zhejiang University		SAMN04447816	SRX1552770	Illumina HiSeq 2000		Indian Ocean	deep-sea hydrothermal vent sediment	-37.88	49.66		2040303	4610	no
3300001679	Ga0012516	Black smokers hydrothermal plume microbial communities from Tahi Moana, Lau Basin, Pacific Ocean	Black smokers hydrothermal plume microbial communities from Tahi Moana, Lau Basin, Pacific Ocean	University of Michigan				Illumina HiSeq 2000	2230	Tahi Moana, Lau Basin, Pacific Ocean	Tahi Moana, Lau Basin, Pacific Ocean	-20.6821	-176.183		213649834	270314	no
2893491077	Ga0454295	Hydrothermal Fe-rich Mat Reference Genomes	Unclassified Euryarchaeota archaeon S19_FULL_No.1_1.2_96	University of Delaware											1985546	2526	no
3300001391	Ga0012453	Hydrothermal vent microbial communities from the Southwest Indian Ridge	Hydrothermal vent microbial communities from the Southwest Indian Ridge - SWIR1	Hong Kong University of Science and Technology				454 GS FLX Titanium			Southwest Indian Ridge				55292183	111303	no
3300010332	Ga0116200	Bacterial and archaeal communities from various locations to study Microbial Dark Matter (Phase II)	Marine hydrothermal vent microbial communities from Guaymas Basin, Gulf of California to study Microbial Dark Matter (Phase II) - Marker 14 Mat core 4571-4 3-6 cm metaG	DOE Joint Genome Institute (JGI)		SAMN06264874	SRX2525221	Illumina HiSeq 2500-1TB	2000	Mexico: Guaymas Basin, Gulf of California	marine hydrothermal sediment	27.0078	-111.407	2009/12/2	1080322849	2490314	yes
3300000307	Ga0010841	Alviniconcha endosymbiont microbial communities from the Eastern Lau Spreading center hydrothermal vents, Pacific Ocean	Alviniconcha endosymbiont microbial communities from the Eastern Lau Spreading center hydrothermal vents, Pacific Ocean - GammaLau	Harvard University				Illumina HiSeq 2000	1870.48	Eastern Lau Spreading Center, Tu'i Malila	Alviniconcha endosymbiont	-21.99	-176.568	2009/5/29	2107801	2524	no
2616644904	Ga0072710	Hydrothermal vent microbial communities from Crab Spa hydrothermal vent, East Pacific Rise	Marinobacter sp. SCGC AD-702-E19 (contamination screened)	Bigelow Laboratory Single Cell Genomics Center (SCGC)				Illumina		Pacific Ocean: East Pacific Rise, Crab Spa		9.83997	-104.294		56805	60	no
2836441327	Ga0400570	Hydrothermal Fe-rich Mat Reference Genomes	Unclassified Zetaproteobacteria bacterium 664-SC8_FULL_No.1_4.3_91	University of Delaware											1919882	1878	no
3300021564	Ga0190296	Microbial communities from sediments and microbial mats in various locations	Hydrothermal vent microbial mat bacterial communities from Southern Trench, Guaymas Basin, Mexico - 4869-30-3-4_MG	DOE Joint Genome Institute (JGI)		SAMN08779064	SRX3982091	Illumina HiSeq 2500-1TB	2001	Mexico: Guaymas Basin	Ultra Mound gradient site, orange microbial mat	27.0074	-110.591	2016/12/21	5573716	16695	no
3300026382	Ga0256836	Marine microbial communities from hydrothermal vents in the Atlantic and Pacific Ocean	Hydrothermal vent microbial communities from Guaymas Basin, Mexico - 4561-380	DOE Joint Genome Institute (JGI)		SAMN09093797	SRX4801602	Illumina HiSeq 2500-1TB	2012	Mexico: Guaymas Basin	Biofilm on thermocouple array	27.0078	-111.407	2009/11/17	150696482	273636	yes
3300032191	Ga0326360	Microbial communities from the deep biosphere	Hydrothermal vent fluid microbial communities from Atlantic Lost City Hydrothermal Field, Atlantic Ocean - LC_3862_1325 re-assembly	Marine Biological Laboratory		SAMN03154334	SRX748862	Illumina HiSeq 1000	733	Atlantic Ocean: Lost City Hydrothermal Field	Hydrothermal vent fluid	30.124	-42.1201	2003/4/27	215561738	511632	no
2836494356	Ga0400616	Hydrothermal Fe-rich Mat Reference Genomes	Unclassified Zetaproteobacteria bacterium S7_FULL_No.6_3.1_33	University of Delaware											635526	777	no
2630968220	Ga0078067	Single Amplified Genomes from Iheya North hydrothermal field in the Okinawa Trough	Anaerolineales sp. SCGC AC-711-L07 (contamination screened)	Bigelow Laboratory Single Cell Genomics Center (SCGC)				Illumina		Pacific Ocean	Okinawa Trough				800722	829	no
3300005792	Ga0079403	Diffuse hydrothermal flow volcanic vent microbial communities from Axial Seamount, northeast Pacific Ocean	Diffuse hydrothermal flow volcanic vent microbial communities from Axial Seamount, northeast Pacific ocean - Sample FS908_Marker33_DNA	Marine Biological Laboratory				Illumina HiSeq 1000	1516	North Pacific Ocean: Axial Seamount	Marker 33 diffuse flow vent, Axial Seamount	45.9332	-129.982	2014/8	21979386	31479	no
2616644879	Ga0072685	Hydrothermal vent microbial communities from Crab Spa hydrothermal vent, East Pacific Rise	Sulfurimonas sp. SCGC AD-682-M21 (contamination screened)	Bigelow Laboratory Single Cell Genomics Center (SCGC)				Illumina		Pacific Ocean: East Pacific Rise, Crab Spa		9.83997	-104.294		1022834	1103	no
3300050934	Ga0504812	Sorted cell/s from hydrothermal vent fluid, Lost City Hydrothermal field, North Atlantic Ocean	Sorted cell/s from hydrothermal vent fluid, Lost City Hydrothermal field, North Atlantic Ocean - AH-954-P03	DOE Joint Genome Institute (JGI)		SAMN49213189	SRX29504551	Illumina NovaSeq S4		North Atlantic Ocean	hydrothermal vent fluid	30.1194	-42.1248	2018/9/21	1429165	1514	no
3300042037	Ga0451325	Mollusc gills microbial communities from various hydrothermal vent in Atlantic Ocean	Mollusc gills microbial communities from Lucky Strike-Montsegur hydrothermal vent, Atlantic Ocean - BazoSym_LS-MS_3_1048H	Max Planck Institute for Marine Microbiology		SAMEA5664342	ERX3367191	Illumina HiSeq 2500	1700	North Atlantic Ocean	mollusc gills	37.2881	-32.2756	2013/8/9	7831468	10832	no
3300019439	Ga0193933	Microbial communities from sediments and microbial mats in various locations	Sorted cell/s from Southern Trench hydrothermal vent microbial mat, Guaymas Basin, Mexico - 6Y_4868_18_08	DOE Joint Genome Institute (JGI)		SAMN08776953	SRX3974360	Illumina NextSeq-HO	2002	Mexico: Guaymas Basin	hydrothermal vent orange microbial mat from Ultra Mound, Coring site 2, gradient	27.001	-110.6	2016/12/19	5251998	5149	no
2728369427	Ga0180924	Deep subsurface and oceanic microbial communities from Witwatersrand Basin, South Africa, and the Canadian and Fennoscandian shields and at the Lost City Hydrothermal Field	Anaerolineales bacterium JdFR-63	DOE Joint Genome Institute (JGI)											1318042	1517	no
2772191015	Ga0262980	Hydrothermal Fe-rich Mat Reference Genomes	Unclassified Zetaproteobacteria bacterium S6_FULL_No.16_1.2_65	University of Delaware											1181203	1316	no
3300009464	Ga0119761	Microbial community analysis of hydrothermal vent diffuse flow samples from Mid-Cayman Rise, Pacific Ocean	Microbial community analysis of hydrothermal vent diffuse flow samples from Mid-Cayman Rise, Pacific Ocean - FS866 no min length	Marine Biological Laboratory					2293	Mid-Cayman Rise	Mid-Cayman Rise diffuse flow	18.37	-81.798	2013/6/21	124385183	580358	no
2616644918	Ga0072827	Hydrothermal vent microbial communities from Crab Spa hydrothermal vent, East Pacific Rise	Gamma proteobacterium SCGC AD-726-D18 (contamination screened)	Bigelow Laboratory Single Cell Genomics Center (SCGC)				Illumina		Pacific Ocean: East Pacific Rise, Crab Spa		9.83997	-104.294		728624	764	no
2772191010	Ga0262975	Hydrothermal Fe-rich Mat Reference Genomes	Unclassified Zetaproteobacteria bacterium S6_FULL_No.10_2.2_89	University of Delaware											2394285	2807	no
3300050949	Ga0504827	Sorted cell/s from hydrothermal vent fluid, Lost City Hydrothermal field, North Atlantic Ocean	Sorted cell/s from hydrothermal vent fluid, Lost City Hydrothermal field, North Atlantic Ocean - AH-956-L09	DOE Joint Genome Institute (JGI)		SAMN49208283	SRX29501356	Illumina NovaSeq S4		North Atlantic Ocean	hydrothermal vent fluid	30.1197	-42.1244	2018/9/21	745154	817	no
3300006088	Ga0081985	Diffuse hydrothermal flow volcanic vent microbial communities from Axial Seamount, northeast Pacific Ocean	Diffuse hydrothermal flow volcanic vent microbial communities from Axial Seamount, northeast Pacific ocean - Sample FS907_Anemone_RNA	Marine Biological Laboratory				Illumina HiSeq 1000	1539	North Pacific Ocean: Axial Seamount	Anemone vent, Axial seamount	45.9332	-130.014	2014/8/15	10314989	26530	no
3300026533	Ga0256826	Marine microbial communities from hydrothermal vents in the Atlantic and Pacific Ocean	Hydrothermal vent microbial communities from East Pacific Rise, Pacific Ocean - CV79	DOE Joint Genome Institute (JGI)		SAMN09094086	SRX4801559	Illumina HiSeq 2500-1TB	2514	Pacific Ocean: East Pacific Rise	Experimental microbial colonizer placed at the East Pacific Rise	9.8472	-104.297	2014/1/18	612734278	1223151	no
3300021493	Ga0190306	Microbial communities from sediments and microbial mats in various locations	Hydrothermal vent sediment bacterial communities from Southern Trench, Guaymas Basin, Mexico - 4870-07-3-4_MG	DOE Joint Genome Institute (JGI)		SAMN08779078	SRX3982111	Illumina HiSeq 2500-1TB	1999	Mexico: Guaymas Basin	Cathedral Hill gradient site area, sediment	27.0114	-110.593	2016/12/22	144589974	293536	yes
2616644891	Ga0072697	Hydrothermal vent microbial communities from Crab Spa hydrothermal vent, East Pacific Rise	Marinobacter sp. SCGC AD-690-L09 (contamination screened)	Bigelow Laboratory Single Cell Genomics Center (SCGC)				Illumina		Pacific Ocean: East Pacific Rise, Crab Spa		9.83997	-104.294		216841	187	no
2836551039	Ga0400667	Hydrothermal Fe-rich Mat Reference Genomes	Unclassified Zetaproteobacteria bacterium 482-BS8_FULL_No.1_4.8_98	Western Washington University											1813771	1970	no
3300010427	Ga0137499	Diffuse hydrothermal flow volcanic vent microbial communities from Axial Seamount, northeast Pacific Ocean	Diffuse hydrothermal flow volcanic vent microbial communities from Axial Seamount, northeast Pacific ocean - Sample FS908_80_TP1_13H	Marine Biological Laboratory				Illumina HiSeq 1000	1516	Marker 33, Axial Seamount, Northeast Pacific Ocean	Marker 33 diffuse flow vent, Axial Seamount	45.9332	-129.982	2014/8	4097842	8907	no
3300003527	Ga0060328	Diffuse hydrothermal flow volcanic vent microbial communities from Axial Seamount, northeast Pacific Ocean	Diffuse hydrothermal flow volcanic vent microbial communities from Axial Seamount, northeast Pacific ocean - Sample LVWS2_TP1_13L					Illumina	1542	North Pacific Ocean: Axial Seamount	Anemone diffuse flow vent, Axial seamount	45.9333	-130.014		2127299	7508	no
3300039262	Ga0438745	Tubeworm-associated microbial communities from Endeavour hydrothermal vents, Juan de Fuca Ridge, Canada	Tubeworm-associated microbial communities from Endeavour hydrothermal vents, Juan de Fuca Ridge, Canada - diffuse fluids MVf12	Dalhousie University				Illumina NextSeq 550	2433	Juan de Fuca Ridge, NE Pacific	Fluids venting through tubeworm assemblage	48.4303	-128.682	2016/8	370203585	646488	no
3300021503	Ga0190348	Microbial communities from sediments and microbial mats in various locations	Hydrothermal vent microbial mat bacterial communities from Southern Trench, Guaymas Basin, Mexico - 4872-13-6-7_MG	DOE Joint Genome Institute (JGI)		SAMN08779248	SRX3982301	Illumina HiSeq 2500-1TB	2011	Mexico: Guaymas Basin	Cathedral Hill gradient site, white microbial mat	27.0114	-110.596	2016/12/24	175339565	362848	yes
3300050951	Ga0504829	Sorted cell/s from hydrothermal vent fluid, Lost City Hydrothermal field, North Atlantic Ocean	Sorted cell/s from hydrothermal vent fluid, Lost City Hydrothermal field, North Atlantic Ocean - AH-956-L17	DOE Joint Genome Institute (JGI)		SAMN49211284	SRX29496417	Illumina NovaSeq S4		North Atlantic Ocean	hydrothermal vent fluid	30.1197	-42.1244	2018/9/21	1291810	1427	no
3300019444	Ga0193926	Microbial communities from sediments and microbial mats in various locations	Sorted cell/s from Southern Trench hydrothermal vent sediment, Guaymas Basin, Mexico - 6Q_4868_13_11	DOE Joint Genome Institute (JGI)		SAMN08779208	SRX3974096	Illumina NextSeq-HO	2002	Mexico: Guaymas Basin	hydrothermal vent brown sediment near microbial mat from Ultra Mound, Coring site 2, gradient	27.001	-110.6	2016/12/19	12272783	11811	no
2616644896	Ga0072701	Hydrothermal vent microbial communities from Crab Spa hydrothermal vent, East Pacific Rise	Sulfurovum sp. SCGC AD-698-D13 (contamination screened)	Bigelow Laboratory Single Cell Genomics Center (SCGC)				Illumina		Pacific Ocean: East Pacific Rise, Crab Spa		9.83997	-104.294		502990	535	no
3300005754	Ga0077786	Microbial community analysis of hydrothermal vent diffuse flow samples from Mid-Cayman Rise, Pacific Ocean	Microbial community analysis of hydrothermal vent diffuse flow samples from Mid-Cayman Rise, Pacific Ocean - FS841	Marine Biological Laboratory					2373	Mid-Cayman Rise	Mid-Cayman Rise	18.375	-81.7976	2012/1/10	72829646	438836	no
3300003737	Ga0062514	Diffuse hydrothermal flow volcanic vent microbial communities from Axial Seamount, northeast Pacific Ocean	Diffuse hydrothermal flow volcanic vent microbial communities from Axial Seamount, northeast Pacific ocean - Sample FS904_80_13H	Marine Biological Laboratory				Illumina HiSeq 1000	1516	Marker 33 diffuse flow vent, Axial Seamount	Marker 33 diffuse flow vent, Axial Seamount	45.9332	-129.982		818507	2075	yes
2616644923	Ga0072833	Hydrothermal vent microbial communities from Crab Spa hydrothermal vent, East Pacific Rise	Arcobacter sp. SCGC AD-726-O21 (contamination screened)	Bigelow Laboratory Single Cell Genomics Center (SCGC)				Illumina		Pacific Ocean: East Pacific Rise, Crab Spa		9.83997	-104.294		1051883	1125	no
3300044577	Ga0485648	Marine microbial communities from various hydrothermal vent chimneys in Pacific Ocean	Marine hydrothermal vent mat microbial communities from Ochre Fields, Axial Seamount, Pacific Ocean - S1	Western Washington University				Illumina MiSeq		Ochre Fields, Axial Seamount, Pacific Ocean	Ochre Fields, Axial Seamount, Pacific Ocean	45.93	-129.98	2002/8	375798447	908937	no
2616644909	Ga0072715	Hydrothermal vent microbial communities from Crab Spa hydrothermal vent, East Pacific Rise	Thermotogae sp. SCGC AD-702-M05 (contamination screened)	Bigelow Laboratory Single Cell Genomics Center (SCGC)				Illumina		Pacific Ocean: East Pacific Rise, Crab Spa		9.83997	-104.294		1648320	1618	no
3300013801	Ga0180414	Microbial community analysis of hydrothermal vent diffuse flow samples from Mid-Cayman Rise, Pacific Ocean	Microbial community analysis of hydrothermal vent diffuse flow samples from Mid-Cayman Rise, Pacific Ocean - FS879 IDBA reassembly	Marine Biological Laboratory						Mid Cayman Rise	Hot Cracks #2, Von Damm, Mid Cayman Rise	18.375	-81.797	2013/6/27	148876027	313501	no
3300013785	Ga0180412	Microbial community analysis of hydrothermal vent diffuse flow samples from Mid-Cayman Rise, Pacific Ocean	Microbial community analysis of hydrothermal vent diffuse flow samples from Mid-Cayman Rise, Pacific Ocean - FS874 IDBA reassembly	Marine Biological Laboratory				Illumina HiSeq	2369	Mid-Cayman Rise	diffuse flow hydrothermal vent	18.376	-81.797	2013/6/26	17930225	20689	no
2616644856	Ga0071361	Hydrothermal vent microbial communities from Crab Spa hydrothermal vent, East Pacific Rise	Aquificae bacterium SCGC AAA036-B04 (unscreened)	Bigelow Laboratory Single Cell Genomics Center (SCGC)				Illumina HiSeq		Pacific Ocean: East Pacific Rise, Crab Spa		9.83997	-104.294		480251	528	no
3300049258	Ga0508361	Tubeworm-associated microbial communities from Endeavour hydrothermal vents, Juan de Fuca Ridge, Canada	Tubeworm-associated microbial communities from Endeavour hydrothermal vents, Juan de Fuca Ridge, Canada - low-flow bush EMw6	Dalhousie University				Illumina NextSeq 550	2197	Juan de Fuca Ridge, NE Pacific	Base of tubeworm bush	47.9501	-129.097	2016/6	861847068	1809848	no
2728369423	Ga0180893	Deep subsurface and oceanic microbial communities from Witwatersrand Basin, South Africa, and the Canadian and Fennoscandian shields and at the Lost City Hydrothermal Field	Nitrospirae bacterium JdFR-81	DOE Joint Genome Institute (JGI)											2050278	2105	no
3300050932	Ga0504808	Sorted cell/s from hydrothermal vent fluid, Lost City Hydrothermal field, North Atlantic Ocean	Sorted cell/s from hydrothermal vent fluid, Lost City Hydrothermal field, North Atlantic Ocean - AH-954-L23	DOE Joint Genome Institute (JGI)		SAMN49211289	SRX29500463	Illumina NovaSeq S4		North Atlantic Ocean	hydrothermal vent fluid	30.1194	-42.1248	2018/9/21	826169	882	no
3300020233	Ga0212224	Black smoker hydrothermal vent sediment microbial communities from the Guaymas Basin, Mid-Atlantic Ridge, South Atlantic Ocean	Black smoker hydrothermal vent sediment microbial communities from the Guaymas Basin, Mid-Atlantic Ridge, South Atlantic Ocean - Sample 1 Archaea reference mapping and reassemble	Beijing Genomics Institute (BGI)				Illumina HiSeq 2500	2770	Mid-Atlantic Ridge, South Atlantic Ocean	Mid-Atlantic Ridge, South Atlantic Ocean	-15.16	-13.35	2012/8	93479897	168239	no
2734482392	Ga0180879	Deep subsurface and oceanic microbial communities from Witwatersrand Basin, South Africa, and the Canadian and Fennoscandian shields and at the Lost City Hydrothermal Field	Candidatus Aminicenantes bacterium JdFR-78	DOE Joint Genome Institute (JGI)											2530072	2432	no
2728369409	Ga0180910	Deep subsurface and oceanic microbial communities from Witwatersrand Basin, South Africa, and the Canadian and Fennoscandian shields and at the Lost City Hydrothermal Field	Dehalococcoides sp. JdFR-56	DOE Joint Genome Institute (JGI)											1798153	1947	no
2893522221	Ga0454316	Hydrothermal Fe-rich Mat Reference Genomes	Unclassified Bacteria S6_FULL_No.1_3.3_92	University of Delaware											2307167	2157	no
2994834431	Ga0579298	Microbial community from the Prony Hydrothermal Field and related strains: Genome sequencing and assembly	Vallitalea pronyensis FatNI3	Mediterranean Institute of Oceanography (MIO)		SAMN14689427		Illumina HiSeq, Oxford Nanopore GridION		New Caledonia: Prony Bay, ST09 site		-22.361	166.88		6325483	5426	no
2721755905	Ga0171574	Genomic Encyclopedia of Type Strains, Phase III (KMG-III): the genomes of soil and plant-associated and newly described type strains	Microbacterium hydrothermale CGMCC 1.12512	DOE Joint Genome Institute (JGI)		SAMN06296950	SRX3021444	Illumina HiSeq 2500-1TB							3788648	3659	no
3300048635	Ga0496631	Hydrothermal vents viral and microbial communities from various locations in Pacific Ocean	Hydrothermal vent flluid microbial communities from North Pacific Ocean - A5006-2E	DOE Joint Genome Institute (JGI)		SAMN51146343	SRX30607096	Illumina NovaSeq S4	2516	North Pacific Ocean	Pelagic ocean, hydrothermal vent flluid	9.838	-104.291	2018/12/10	461900114	824557	yes
3300006609	Ga0101559	Diffuse hydrothermal flow volcanic vent microbial communities from Axial Seamount, northeast Pacific Ocean	Diffuse hydrothermal flow volcanic vent microbial communities from Axial Seamount, northeast Pacific ocean - Sample FS904_Marker33_RNA	The Marine Biological Laboratory				Illumina	1516	North Pacific Ocean: Axial Seamount	Marker 33 diffuse flow vent, Axial Seamount	45.9332	-129.982		7392897	24320	yes
2836451291	Ga0400577	Hydrothermal Fe-rich Mat Reference Genomes	Unclassified Zetaproteobacteria bacterium 664-SC8_FULL_No.8_1.0_78	University of Delaware											1590716	1856	no
3300003518	Ga0060297	Diffuse hydrothermal flow volcanic vent microbial communities from Axial Seamount, northeast Pacific Ocean	Diffuse hydrothermal flow volcanic vent microbial communities from Axial Seamount, northeast Pacific ocean - Sample FS861_Marker113_DNA					Illumina	1522	North Pacific Ocean: Axial Seamount	Marker 113 diffuse flow vent, Axial Seamount	45.923	-129.988	2012/8/1	113071139	255851	no
3300010418	Ga0137507	Diffuse hydrothermal flow volcanic vent microbial communities from Axial Seamount, northeast Pacific Ocean	Diffuse hydrothermal flow volcanic vent microbial communities from Axial Seamount, northeast Pacific ocean - Sample LVWS5_30_TP2_12H	Marine Biological Laboratory				Illumina HiSeq 1000	1542	Northeast Pacific Ocean: Anemone vent, Axial Seamount	Anemone diffuse flow vent, Axial Seamount	45.933	-130.014	2014/8	746108	2246	no
3300050910	Ga0504786	Sorted cell/s from hydrothermal vent fluid, Lost City Hydrothermal field, North Atlantic Ocean	Sorted cell/s from hydrothermal vent fluid, Lost City Hydrothermal field, North Atlantic Ocean - AH-954-B11	DOE Joint Genome Institute (JGI)		SAMN49218543	SRX29504982	Illumina NovaSeq S4		North Atlantic Ocean	hydrothermal vent fluid	30.1194	-42.1248	2018/9/21	988647	1095	no
3300042033	Ga0451321	Mollusc gills microbial communities from various hydrothermal vent in Atlantic Ocean	Mollusc gills microbial communities from Semeiov-Ash lighthouse hydrothermal vent, Atlantic Ocean - BputSym_Se-AL_2_1115B	Max Planck Institute for Marine Microbiology		SAMEA5664338	ERX3367187		2432	North Atlantic Ocean	mollusc gills	13.5135	-44.9631	2014/11/22	49567010	62094	no
3300048630	Ga0496625	Hydrothermal vents viral and microbial communities from various locations in Pacific Ocean	Hydrothermal vent plume microbial communities from North Pacific Ocean - CTD007A	DOE Joint Genome Institute (JGI)		SAMN51146295	SRX30606930	Illumina NovaSeq S4	2500	North Pacific Ocean	Pelagic ocean, hydrothermal vent plume	9.83807	-104.291	2018/12/12	871376927	1374369	yes
3300028026	Ga0256846	Marine microbial communities from hydrothermal vents in the Atlantic and Pacific Ocean	Tube worm associated microbial communities from hydrothermal vent at the East Pacific Rise, Pacific Ocean - Tevnia	DOE Joint Genome Institute (JGI)		SAMN10350640	SRX5246668	Illumina HiSeq 2500-1TB	2511	Pacific Ocean: East Pacific Rise	Scraping of Tevnia jerichoana	9.8441	-104.297	2014/1/12	440506227	703030	no
3300050915	Ga0504791	Sorted cell/s from hydrothermal vent fluid, Lost City Hydrothermal field, North Atlantic Ocean	Sorted cell/s from hydrothermal vent fluid, Lost City Hydrothermal field, North Atlantic Ocean - AH-954-E09	DOE Joint Genome Institute (JGI)		SAMN49212189	SRX29505249	Illumina NovaSeq S4		North Atlantic Ocean	hydrothermal vent fluid	30.1194	-42.1248	2018/9/21	911114	968	no
3300009462	Ga0119760	Microbial community analysis of hydrothermal vent diffuse flow samples from Mid-Cayman Rise, Pacific Ocean	Microbial community analysis of hydrothermal vent diffuse flow samples from Mid-Cayman Rise, Pacific Ocean - FS872 no min length	Marine Biological Laboratory				Illumina HiSeq	2372	Mid-Cayman Rise	Marker X18 Mid-Cayman Rise diffuse flow	18.375	-81.797	2013/6/26	143000820	577634	no
2836514127	Ga0400632	Hydrothermal Fe-rich Mat Reference Genomes	Unclassified Zetaproteobacteria bacterium 479-BS4_FULL_No.2_6.8_91	Western Washington University											2009745	2214	no
3300022236	Ga0236251	Characterization of microbial community from Mariana Back Arc	Hydrothermal fluids microbial communities from Mariana Back-Arc Basin vent fields, Pacific Ocean - Hafa_FS926_RNA_SIP 150_kmer	Marine Biological Laboratory				Illumina NextSeq	3277	Hafa Adai vent field, Mariana back arc basin	Hafa Adai vent field	16.9613	144.868	2016/12/10	1902722	3434	yes
2585428063	Ga0008238	Genomic Encyclopedia of Type Strains, Phase I: the one thousand microbial genomes (KMG-I) project	Desulforamulus hydrothermalis Lam5	DOE Joint Genome Institute (JGI)		SAMN02745177	SRX2070164	Illumina HiSeq 2500		North East Tunisia	Terrestrial hot spring				2628775	2691	no
3300028030	Ga0256831	Marine microbial communities from hydrothermal vents in the Atlantic and Pacific Ocean	Hydrothermal vent microbial communities from Lau Basin, Pacific Ocean - 132-544	DOE Joint Genome Institute (JGI)		SAMN10350646	SRX5246454	Illumina HiSeq 2500-1TB	1876	Pacific Ocean: Lau Basin	Hydrothermal sulfide rock	-21.9896	-176.568	2005/4/24	640257898	1272930	yes
3300009490	Ga0119764	Microbial community analysis of hydrothermal vent diffuse flow samples from Mid-Cayman Rise, Pacific Ocean	Microbial community analysis of hydrothermal vent diffuse flow samples from Mid-Cayman Rise, Pacific Ocean - FS852 no min length	Marine Biological Laboratory				Illumina HiSeq	4986	Mid-Cayman Rise	diffuse flow fluids, Shrimp Canyon	18.5471	-81.7182	2012/1/2	214100442	1081687	no
2728369418	Ga0180894	Deep subsurface and oceanic microbial communities from Witwatersrand Basin, South Africa, and the Canadian and Fennoscandian shields and at the Lost City Hydrothermal Field	Nitrospirae bacterium JdFR-82	DOE Joint Genome Institute (JGI)											735991	874	no
3300041960	Ga0456190	Diffuse hydrothermal flow volcanic vent microbial communities from Axial Seamount, northeast Pacific Ocean	Diffuse hydrothermal flow volcanic vent microbial communities from Axial Seamount, northeast Pacific ocean - Sample FS907_Anemone_DNA SE_2020	Marine Biological Laboratory				Illumina HiSeq 1000	1542	North Pacific Ocean: Axial Seamount	Anemone diffuse flow vent, Axial seamount	45.9332	-130.014	2014/8	320566317	603070	yes
3300021507	Ga0190316	Microbial communities from sediments and microbial mats in various locations	Hydrothermal vent sediment bacterial communities from Southern Trench, Guaymas Basin, Mexico - 4870-11-1-2_MG	DOE Joint Genome Institute (JGI)		SAMN08777169	SRX3982218	Illumina HiSeq 2500-1TB	2005	Mexico: Guaymas Basin	Rebecca's Roost sulfide chimney, sediment	27.0118	-110.596	2016/12/22	264224592	551683	yes
3300010423	Ga0137496	Diffuse hydrothermal flow volcanic vent microbial communities from Axial Seamount, northeast Pacific Ocean	Diffuse hydrothermal flow volcanic vent microbial communities from Axial Seamount, northeast Pacific ocean - Sample FS906_80_TP1_13L	Marine Biological Laboratory				Illumina HiSeq 1000	1522	Marker 113, Axial Seamount, Northeast Pacific Ocean	Marker 113 diffuse flow vent, Axial Seamount	45.9227	-129.988	2014/8	1411584	4122	yes
3300050007	Ga0496600	Hydrothermal vents viral and microbial communities from various locations in Pacific Ocean	Hydrothermal vent plume viral communities from North Pacific Ocean - CTD-AT42-06-008-2490m-0.03 v	DOE Joint Genome Institute (JGI)		SAMN51146558	SRX30592359	Illumina NovaSeq S4	2490	North Pacific Ocean	Pelagic ocean, hydrothermal vent plume	9.83807	-104.291	2018/12/12	292270455	693834	no
3300041925	Ga0455663	Diffuse hydrothermal flow volcanic vent microbial communities from Axial Seamount, northeast Pacific Ocean	Diffuse hydrothermal flow volcanic vent microbial communities from Axial Seamount, northeast Pacific ocean - Sample FS891_Anemone_DNA SE_2020	The Marine Biological Laboratory				Illumina	1542	North Pacific Ocean: Axial Seamount	Anemone diffuse flow vent, Axial seamount	45.9332	-130.014		382383771	789430	yes
3300003509	Ga0060303	Marine hydrothermal diffuse flow vent microbial communities from the Mid-Cayman Rise, Caribbean Sea	Marine hydrothermal diffuse flow vent microbial communities from the Mid-Cayman Rise, Caribbean Sea - Sample FS848	Marine Biological Laboratory				Illumina HiSeq 2000	2308	Mid-Cayman Rise	Ginger Castle, Von Damm	18.3769	-81.7979	2012/1/19	57973490	64441	no
2648501899	Ga0045936	Desulfovibrio hydrothermalis AM13 = DSM 14728	Maridesulfovibrio hydrothermalis AM13	CEA Genoscope		SAMEA2272440		454 GS FLX Titanium, Solexa	2600	East-Pacific Rise	Deep-sea hydrothermal chimney wall	-20.0001	-115		3708362	3340	no
2617270843	Ga0073562	Genome sequencing of Thermotogales isolates from hydrothermal vents	Thermosipho melanesiensis 487	Norwegian Sequencing Centre (NSC)		SAMN03284851		Illumina MiSeq		Pacific Ocean: Lau Basin	hydrothermal vent				1889857	1877	no
3300019442	Ga0193918	Microbial communities from sediments and microbial mats in various locations	Sorted cell/s from Southern Trench hydrothermal vent microbial mat, Guaymas Basin, Mexico - 6D_4862_10_16	DOE Joint Genome Institute (JGI)		SAMN08776957	SRX3974059	Illumina NextSeq-HO	1999	Mexico: Guaymas Basin	hydrothermal vent microbial mat 1 from Smoker "X", Site 5	27.001	-110.6	2016/12/13	8088422	8905	no
3300021489	Ga0190335	Microbial communities from sediments and microbial mats in various locations	Hydrothermal vent sediment bacterial communities from Southern Trench, Guaymas Basin, Mexico - 4872-04-8-9_MG	DOE Joint Genome Institute (JGI)		SAMN08777167	SRX3982279	Illumina HiSeq 2500-1TB	2011	Mexico: Guaymas Basin	Cathedral Hill gradient site, bare sediment just outside mat	27.0114	-110.596	2016/12/24	121323270	263884	yes
3300005752	Ga0077565	Microbial community analysis of hydrothermal vent diffuse flow samples from Mid-Cayman Rise, Pacific Ocean	Microbial community analysis of hydrothermal vent diffuse flow samples from Mid-Cayman Rise, Pacific Ocean - FS856	Marine Biological Laboratory						Mid-Cayman Rise	diffuse flow hydrothermal vent fluids			2012	54579746	71114	no
2585428172	Ga0008220	Genomic Encyclopedia of Type Strains, Phase I: the one thousand microbial genomes (KMG-I) project	Desulfacinum hydrothermale DSM 13146	DOE Joint Genome Institute (JGI)		SAMN02746041	SRX2066025	Illumina HiSeq 2500		Palaeochori Bay, south east Milos Island	Active, marine, shallow-water hydrothermal vent system	36.6751	24.5161		3696795	3331	no
3300021494	Ga0190329	Microbial communities from sediments and microbial mats in various locations	Hydrothermal vent sediment bacterial communities from Southern Trench, Guaymas Basin, Mexico - 4872-04-2-3_MG	DOE Joint Genome Institute (JGI)		SAMN08777168	SRX3982245	Illumina HiSeq 2500-1TB	2011	Mexico: Guaymas Basin	Cathedral Hill gradient site, bare sediment just outside mat	27.0114	-110.596	2016/12/24	132448079	295983	yes
3300026534	Ga0256841	Marine microbial communities from hydrothermal vents in the Atlantic and Pacific Ocean	Hydrothermal vent microbial communities from Mid Atlantic Ridge, Atlantic Ocean - 356-308	DOE Joint Genome Institute (JGI)		SAMN09093794	SRX4801609	Illumina HiSeq 2500-1TB	1672	Atlantic Ocean: Mid Atlantic Ridge	Hydrothermal sulfide rock	37.2904	-32.2765	2008/7/25	665474504	1170547	no
3300006611	Ga0101553	Diffuse hydrothermal flow volcanic vent microbial communities from Axial Seamount, northeast Pacific Ocean	Diffuse hydrothermal flow volcanic vent microbial communities from Axial Seamount, northeast Pacific ocean - Sample FS903_Marker113_DNA	The Marine Biological Laboratory				Illumina	1522	North Pacific Ocean: Axial Seamount	Marker 113 diffuse flow vent, Axial Seamount	45.9227	-129.988		193269043	494825	yes
3300021504	Ga0190344	Microbial communities from sediments and microbial mats in various locations	Hydrothermal vent microbial mat bacterial communities from Southern Trench, Guaymas Basin, Mexico - 4872-13-2-3_MG	DOE Joint Genome Institute (JGI)		SAMN08776764	SRX3982298	Illumina HiSeq 2500-1TB	2011	Mexico: Guaymas Basin	Cathedral Hill gradient site, white microbial mat	27.0114	-110.596	2016/12/24	241930256	486164	no
2728369416	Ga0180898	Deep subsurface and oceanic microbial communities from Witwatersrand Basin, South Africa, and the Canadian and Fennoscandian shields and at the Lost City Hydrothermal Field	Nitrospirae bacterium JdFR-88	DOE Joint Genome Institute (JGI)											1858353	1984	no
3300008759	Ga0103950	Microbial communities of hydrothermal vent from Guaymas Basin, Gulf of California	Microbial communities of hydrothermal vent from Guaymas Basin, Gulf of California - chimney sediment	Shanghai Jiao Tong University		SAMN03566765	SRX1008212	Illumina GAIIx		Guaymas Basin, Gulf of California	Guaymas Basin, Gulf of California	27.015	-111.033	2009/11	19974778	71126	yes
3300007279	Ga0079919	Hydrothermal vent microbial communities from Crab Spa hydrothermal vent, East Pacific Rise	Hydrothermal vent microbial communities from Crab Spa hydrothermal vent, East Pacific Rise - large volume pump, sample 4	Bigelow Laboratory Single Cell Genomics Center (SCGC)						Crab Spa Hydrothermal Vent, East Pacific Rise	Crab Spa Hydrothermal Vent	9.84417	-104.297	2014/1/10	62973825	170835	no
2836462025	Ga0400586	Hydrothermal Fe-rich Mat Reference Genomes	Unclassified Zetaproteobacteria bacterium 665-MMA12_FULL_No.6_1.9_6	University of Delaware											279909	377	no
3300042700	Ga0454360	Microbial symbiotic communities from bathmodiolin mussel gills	Mollusc gills microbial communities from Semeiov-Ash lighthouse hydrothermal vent, Atlantic Ocean - BputSym_Se-AL_2_1115B Re-assembly	Max Planck Institute for Marine Microbiology		SAMEA5664338	ERX3367187		2432	North Atlantic Ocean	mollusc gills	13.5135	-44.9631	2014/11/22	95645230	93012	no
3300041957	Ga0456187	Diffuse hydrothermal flow volcanic vent microbial communities from Axial Seamount, northeast Pacific Ocean	Diffuse hydrothermal flow volcanic vent microbial communities from Axial Seamount, northeast Pacific ocean - Sample FS903_Marker113_DNA SE_2020	The Marine Biological Laboratory				Illumina	1522	North Pacific Ocean: Axial Seamount	Marker 113 diffuse flow vent, Axial Seamount	45.9227	-129.988		181581364	409717	no
2728369299	Ga0180920	Deep subsurface and oceanic microbial communities from Witwatersrand Basin, South Africa, and the Canadian and Fennoscandian shields and at the Lost City Hydrothermal Field	Candidatus Bathyarchaeota archaeon JdFR-07	DOE Joint Genome Institute (JGI)											907597	1049	no
3300005753	Ga0077776	Microbial community analysis of hydrothermal vent diffuse flow samples from Mid-Cayman Rise, Pacific Ocean	Microbial community analysis of hydrothermal vent diffuse flow samples from Mid-Cayman Rise, Pacific Ocean - mega-assembly	Marine Biological Laboratory				Illumina HiSeq	2370	Mid-Cayman Rise	diffuse flow fluids	18.375	-81.797	2012/1	589999552	770870	yes
3300019443	Ga0193939	Microbial communities from sediments and microbial mats in various locations	Sorted cell/s from Southern Trench hydrothermal vent microbial mat, Guaymas Basin, Mexico - 6AK_4869_21_06	DOE Joint Genome Institute (JGI)		SAMN08778861	SRX3974423	Illumina NextSeq-HO	2001	Mexico: Guaymas Basin	hydrothermal vent white microbial mat from Ultra Mound gradient site	27.001	-110.6	2016/12/21	6579562	7892	no
2893480180	Ga0454287	Hydrothermal Fe-rich Mat Reference Genomes	Unclassified Deltaproteobacteria bacterium S6_FULL_No.4_1.2_94	University of Delaware											2107429	2081	no
3300000327	Ga0011156	Marine microbial communities from a deep-sea hydrothermal vent at Loihi Seamount, Hawaii	Marine microbial communities from hydrothermal vents at Loihi seamountain, Hawaii - Spillway-mat	Pennsylvania State University				454 GS FLX Titanium	1271	Loihi Seamount, Hawaii	Biomats	18.91	-155.26	2003/5/1	8401934	9317	no
2616644924	Ga0072830	Hydrothermal vent microbial communities from Crab Spa hydrothermal vent, East Pacific Rise	Gamma proteobacterium SCGC AD-726-K05 (contamination screened)	Bigelow Laboratory Single Cell Genomics Center (SCGC)				Illumina		Pacific Ocean: East Pacific Rise, Crab Spa		9.83997	-104.294		430782	430	no
3300010422	Ga0137497	Diffuse hydrothermal flow volcanic vent microbial communities from Axial Seamount, northeast Pacific Ocean	Diffuse hydrothermal flow volcanic vent microbial communities from Axial Seamount, northeast Pacific ocean - Sample FS908_80_TP1_12H	Marine Biological Laboratory				Illumina HiSeq 1000	1516	Marker 33, Axial Seamount, Northeast Pacific Ocean	Marker 33 diffuse flow vent, Axial Seamount	45.9332	-129.982	2014/8	1458386	3755	no
2728369411	Ga0180913	Deep subsurface and oceanic microbial communities from Witwatersrand Basin, South Africa, and the Canadian and Fennoscandian shields and at the Lost City Hydrothermal Field	Candidatus Acetothermia bacterium JdFR-46	DOE Joint Genome Institute (JGI)											1088071	1264	no
2836496842	Ga0400619	Hydrothermal Fe-rich Mat Reference Genomes	Unclassified Zetaproteobacteria bacterium S7_FULL_No.9_2.1_30	University of Delaware											468525	547	no
2836524878	Ga0400639	Hydrothermal Fe-rich Mat Reference Genomes	Unclassified Zetaproteobacteria bacterium 479-BS4_FULL_No.8_1.6_68	Western Washington University											2116181	2309	no
3300003511	Ga0060304	Marine hydrothermal diffuse flow vent microbial communities from the Mid-Cayman Rise, Caribbean Sea	Marine hydrothermal diffuse flow vent microbial communities from the Mid-Cayman Rise, Caribbean Sea - Sample FS856	Marine Biological Laboratory				Illumina HiSeq 2000	4956	Mid-Cayman Rise	Shrimp Gulley #2, Beebe Sea Mound, Piccard	18.5466	-81.7177	2012/1/23	63897472	70982	no
3300050933	Ga0504809	Sorted cell/s from hydrothermal vent fluid, Lost City Hydrothermal field, North Atlantic Ocean	Sorted cell/s from hydrothermal vent fluid, Lost City Hydrothermal field, North Atlantic Ocean - AH-954-N08	DOE Joint Genome Institute (JGI)		SAMN49220298	SRX29498536	Illumina NovaSeq S4		North Atlantic Ocean	hydrothermal vent fluid	30.1194	-42.1248	2018/9/21	530794	604	no
2728369422	Ga0180890	Deep subsurface and oceanic microbial communities from Witwatersrand Basin, South Africa, and the Canadian and Fennoscandian shields and at the Lost City Hydrothermal Field	Peptococcaceae bacterium JdFR-69	DOE Joint Genome Institute (JGI)											1779991	1848	no
2836539308	Ga0400649	Hydrothermal Fe-rich Mat Reference Genomes	Unclassified Zetaproteobacteria bacterium 481-BS4_FULL_No.5_1.9_23	Western Washington University											447453	476	no
3300032023	Ga0326359	Microbial communities from the deep biosphere	Hydrothermal vent fluid microbial communities from New Bay of Prony, New Caledonia - Prony28 re-assembly	Marine Biological Laboratory		SAMN03154342	SRX748870	Illumina HiSeq 1000	43	New Caledonia: Bay of Prony	Hydrothermal vent fluid	-22.3609	166.88	2005/6/14	78068154	194633	no
2616644858	Ga0072650	Hydrothermal vent microbial communities from Crab Spa hydrothermal vent, East Pacific Rise	Arcobacter sp. SCGC AAA036-J15 (contamination screened)	Bigelow Laboratory Single Cell Genomics Center (SCGC)				Illumina		Pacific Ocean: East Pacific Rise, Crab Spa		9.83997	-104.294		893823	877	no
3300065665	Ga0496613	Hydrothermal vents viral and microbial communities from various locations in Pacific Ocean	Hydrothermal vent plume viral communities from Gulf of California, Mexico - CTD-FK190211-01-2006m-0.03 v	DOE Joint Genome Institute (JGI)				Illumina NovaSeq S4	2006	Mexico: Gulf of California	Pelagic ocean, hydrothermal vent plume	27.0013	-111.412	2019/2/26	418510241	934365	no
3300010416	Ga0137503	Diffuse hydrothermal flow volcanic vent microbial communities from Axial Seamount, northeast Pacific Ocean	Diffuse hydrothermal flow volcanic vent microbial communities from Axial Seamount, northeast Pacific ocean - Sample LVWS5_30_TP1_13H	Marine Biological Laboratory				Illumina HiSeq 1000	1542	Northeast Pacific Ocean: Anemone vent, Axial Seamount	Anemone diffuse flow vent, Axial Seamount	45.933	-130.014	2014/8	581931	1535	no
3300005789	Ga0079399	Diffuse hydrothermal flow volcanic vent microbial communities from Axial Seamount, northeast Pacific Ocean	Diffuse hydrothermal flow volcanic vent microbial communities from Axial Seamount, northeast Pacific ocean - Sample FS891_Anemone_DNA	The Marine Biological Laboratory				Illumina	1542	North Pacific Ocean: Axial Seamount	Anemone diffuse flow vent, Axial seamount	45.9332	-130.014		28138298	37992	no
3300040675	Ga0438892	Tubeworm-associated microbial communities from Endeavour hydrothermal vents, Juan de Fuca Ridge, Canada	Tubeworm-associated microbial communities from Endeavour hydrothermal vents, Juan de Fuca Ridge, Canada - diffuse fluids EMf1	Dalhousie University				Illumina NextSeq 550	2181	Juan de Fuca Ridge, NE Pacific	Fluids venting through tubeworm assemblage	47.9501	-129.097	2016/8	494230688	1033435	no
3300042032	Ga0451320	Mollusc gills microbial communities from various hydrothermal vent in Atlantic Ocean	Mollusc gills microbial communities from Semeiov-Ash lighthouse hydrothermal vent, Atlantic Ocean - BputSym_Se-AL_3_1115C	Max Planck Institute for Marine Microbiology		SAMEA5664337	ERX3367186		2432	North Atlantic Ocean	mollusc gills	13.5135	-44.9631	2014/11/22	19564288	29002	no
3300021975	Ga0232643	Characterization of microbial community from Mariana Back Arc	Hydrothermal fluids microbial communities from Mariana Back-Arc Basin vent fields, Pacific Ocean - Hafa_FS927 _150kmer	Marine Biological Laboratory				Illumina NextSeq	3278	Hafa Adai vent field, Mariana back arc basin	Hafa Adai vent field	16.9618	144.869	2016/12/11	436682860	858940	yes
3300028399	Ga0256830	Marine microbial communities from hydrothermal vents in the Atlantic and Pacific Ocean	Hydrothermal vent microbial communities from Lau Basin, Pacific Ocean - 128-326	DOE Joint Genome Institute (JGI)		SAMN10350717	SRX5246451	Illumina HiSeq 2500-1TB	2138	Pacific Ocean: Lau Basin	Hydrothermal sulfide rock	-20.761	-176.191	2005/4/13	512596221	922795	yes
3300021580	Ga0190294	Microbial communities from sediments and microbial mats in various locations	Hydrothermal vent microbial mat bacterial communities from Southern Trench, Guaymas Basin, Mexico - 4869-30-1-2_MG	DOE Joint Genome Institute (JGI)		SAMN08776768	SRX3982093	Illumina HiSeq 2500-1TB	2001	Mexico: Guaymas Basin	Ultra Mound gradient site, orange microbial mat	27.0074	-110.591	2016/12/21	87935217	241630	yes
3300021502	Ga0190307	Microbial communities from sediments and microbial mats in various locations	Hydrothermal vent sediment bacterial communities from Southern Trench, Guaymas Basin, Mexico - 4870-07-4-5_MG	DOE Joint Genome Institute (JGI)		SAMN08777170	SRX3982109	Illumina HiSeq 2500-1TB	1999	Mexico: Guaymas Basin	Cathedral Hill gradient site area, sediment	27.0114	-110.593	2016/12/22	163783968	347638	yes
2836481201	Ga0400603	Hydrothermal Fe-rich Mat Reference Genomes	Unclassified Zetaproteobacteria bacterium 667-BS4_FULL_No.14_1.8_29	University of Delaware											815386	1048	no
3300039263	Ga0438744	Tubeworm-associated microbial communities from Endeavour hydrothermal vents, Juan de Fuca Ridge, Canada	Tubeworm-associated microbial communities from Endeavour hydrothermal vents, Juan de Fuca Ridge, Canada - diffuse fluids EMf7	Dalhousie University				Illumina NextSeq 550	2185	Juan de Fuca Ridge, NE Pacific	Fluids venting through tubeworm assemblage	47.9497	-129.098	2016/8	179677187	441668	no
3300044574	Ga0485628	Metagenomic Analysis of Freshwater Hydrothermal Vents	Freshwater hydrothermal vent microbial communities from Crater Lake, Oregon, USA - S13	Western Washington University				Illumina MiSeq	1949	Crater Lake, Oregon, USA	Crater Lake, Oregon, USA	42.9415	-122.099	1987/6	189974085	428285	no
3300041401	Ga0453480	Diffuse flow microbial communities from hydrothermal vent near Loihi Seamount, Hawaii, USA	Diffuse flow microbial community from hydrothermal vent near Loihi Seamount, Hawaii, USA - MH3013C5	Marine Biological Laboratory				Illumina NextSeq 500		USA: Kilauea Volcano, Hawaii	Diffuse flow from hydrothermal vent	19.42	-155.28	2018/8/28	3997633	5111	no
3300027323	Ga0209426	Deep subsurface and oceanic microbial communities from Witwatersrand Basin, South Africa, and the Canadian and Fennoscandian shields and at the Lost City Hydrothermal Field	Deep oceanic, basalt-hosted subsurface ecosystem from Juan de Fuca Ridge flank, Pacific Ocean, CORK Borehole 1362B_J2.571 (SPAdes) (version 2)	DOE Joint Genome Institute (JGI)		SAMN03166138	SRX753338, SRX1888493	Illumina HiSeq 2500	290	Juan de Fuca Ridge flank, Pacific Ocean	Juan de Fuca Ridge flank, Pacific Ocean	47.76	-127.76	2011/7/10	271974198	486713	yes
3300021492	Ga0190336	Microbial communities from sediments and microbial mats in various locations	Hydrothermal vent sediment bacterial communities from Southern Trench, Guaymas Basin, Mexico - 4872-04-9-10_MG	DOE Joint Genome Institute (JGI)		SAMN08777292	SRX3982281	Illumina HiSeq 2500-1TB	2011	Mexico: Guaymas Basin	Cathedral Hill gradient site, bare sediment just outside mat	27.0114	-110.596	2016/12/24	138435750	304837	yes
2836439418	Ga0400568	Hydrothermal Fe-rich Mat Reference Genomes	Unclassified Zetaproteobacteria bacterium 664-BS3_FULL_No.7_0.4_17	University of Delaware											198974	259	no
3300019447	Ga0193913	Microbial communities from sediments and microbial mats in various locations	Sorted cell/s from Southern Trench hydrothermal vent microbial mat, Guaymas Basin, Mexico - 4E_dil_4869_18_06	DOE Joint Genome Institute (JGI)		SAMN08779147	SRX3973875	Illumina NextSeq-HO	2001	Mexico: Guaymas Basin	hydrothermal vent orange microbial mat from Ultra Mound gradient site	27.001	-110.6	2016/12/21	18151602	16356	no
3300005757	Ga0078058	Microbial community analysis of hydrothermal vent diffuse flow samples from Mid-Cayman Rise, Pacific Ocean	Microbial community analysis of hydrothermal vent diffuse flow samples from Mid-Cayman Rise, Pacific Ocean - FS872	Marine Biological Laboratory				Illumina HiSeq	2372	Mid-Cayman Rise	Marker X18 Mid-Cayman Rise diffuse flow	18.375	-81.797	2013/6/26	29132078	32038	no
2616644898	Ga0072704	Hydrothermal vent microbial communities from Crab Spa hydrothermal vent, East Pacific Rise	Bacterium SCGC AD-698-I09 (unscreened)	Bigelow Laboratory Single Cell Genomics Center (SCGC)				Illumina		Pacific Ocean: East Pacific Rise, Crab Spa		9.83997	-104.294		414175	419	no
3300010424	Ga0137500	Diffuse hydrothermal flow volcanic vent microbial communities from Axial Seamount, northeast Pacific Ocean	Diffuse hydrothermal flow volcanic vent microbial communities from Axial Seamount, northeast Pacific ocean - Sample FS908_80_TP1_13L	Marine Biological Laboratory				Illumina HiSeq 1000	1516	Marker 33, Axial Seamount, Northeast Pacific Ocean	Marker 33 diffuse flow vent, Axial Seamount	45.9332	-129.982	2014/8	1850998	4570	no
3300003524	Ga0060310	Diffuse hydrothermal flow volcanic vent microbial communities from Axial Seamount, northeast Pacific Ocean	Diffuse hydrothermal flow volcanic vent microbial communities from Axial Seamount, northeast Pacific ocean - Sample LVWS2_TP1_12H					Illumina	1542	Axial seamount, northeast pacific ocean	Anemone diffuse flow vent, Axial seamount	45.9333	-130.014		525459	1888	no
2616644922	Ga0072832	Hydrothermal vent microbial communities from Crab Spa hydrothermal vent, East Pacific Rise	Sulfurimonas sp. SCGC AD-726-N15 (contamination screened)	Bigelow Laboratory Single Cell Genomics Center (SCGC)				Illumina		Pacific Ocean: East Pacific Rise, Crab Spa		9.83997	-104.294		1137932	1221	no
2836450370	Ga0400576	Hydrothermal Fe-rich Mat Reference Genomes	Unclassified Zetaproteobacteria bacterium 664-SC8_FULL_No.7_1.3_42	University of Delaware											825239	920	no
3300001386	Ga0012449	Hydrothermal vent plume microbial communities from the Cayman RIse, Caribbean Sea	Cayman MG2b					Illumina HiSeq 2000	4953	Mid Cayman Rise	Mid Cayman Rise deep background	18.43	-81.47	2012/1/25	1872047	1865	no
3300019395	Ga0193929	Microbial communities from sediments and microbial mats in various locations	Sorted cell/s from Southern Trench hydrothermal vent sediment, Guaymas Basin, Mexico - 6U_4868_13_27	DOE Joint Genome Institute (JGI)		SAMN08779209	SRX3974126	Illumina NextSeq-HO	2002	Mexico: Guaymas Basin	hydrothermal vent brown sediment near microbial mat from Ultra Mound, Coring site 2, gradient	27.001	-110.6	2016/12/19	1177423	1490	no
3300002590	Ga0041812	Diffuse hydrothermal flow volcanic vent microbial communities from Axial Seamount, northeast Pacific Ocean	Diffuse hydrothermal flow volcanic vent microbial communities from Axial Seamount, northeast Pacific ocean - Sample FS903_30_12H	The Marine Biological Laboratory					1522	Marker 113, Axial Seamount	Marker 113, Axial Seamount	45.9227	-129.988		1547689	5313	no
3300026510	Ga0256840	Marine microbial communities from hydrothermal vents in the Atlantic and Pacific Ocean	Hydrothermal vent microbial communities from Mid Atlantic Ridge, Atlantic Ocean - 355-202	DOE Joint Genome Institute (JGI)		SAMN09094698	SRX4801606	Illumina HiSeq 2500-1TB	2292	Atlantic Ocean: Mid Atlantic Ridge	Hydrothermal sulfide rock	36.2294	-33.9028	2008/7/23	358573039	562563	yes
3300006081	Ga0081760	Diffuse hydrothermal flow volcanic vent microbial communities from Axial Seamount, northeast Pacific Ocean	Diffuse hydrothermal flow volcanic vent microbial communities from Axial Seamount, northeast Pacific ocean - Sample FS906_Marker113_DNA	Marine Biological Laboratory				Illumina HiSeq 1000	1522	North Pacific Ocean: Axial Seamount	Marker 113 diffuse flow vent, Axial Seamount	45.9227	-129.988	2014/8	249836472	581619	no
3300023310	Ga0256722	Hydrothermal Fe-rich Mat Reference Genomes	Hydrothermal Fe-rich mat microbial community from Loihi Seamount, Hawaii, USA - 674-BM1-C3	University of Delaware				Illumina HiSeq 2500	1179.43	USA: Loihi Seamount, Hawaii	Pohaku (Marker #57)	18.9014	-155.258	2013/3/25	97362260	150198	no
2901528366	Ga0466268	Bacterial isolate from hydrothermal vent	Desulfurobacterium sp. AV08	J. Craig Venter Institute				Oxford Nanopore MinION				45.58	-130		1732745	1824	no
3300007727	Ga0105718	Diffuse hydrothermal flow volcanic vent microbial communities from Axial Seamount, northeast Pacific Ocean	Diffuse hydrothermal flow volcanic vent microbial communities from Axial Seamount, northeast Pacific ocean - Sample FS918_NRZ_RNA CLC_assembly	Marine Biological Laboratory				Illumina NextSeq	1716	North Rift Zone, Axial Seamount, northeast Pacific Ocean	North Rift Zone, Axial Seamount, northeast Pacific Ocean	45.9332	-129.995	2015/8/27	334894	754	no
2119805005	Ga0010900	Hydrothermal vent microbial communiites from Tahi Moana, Eastern Lau Basin, Pacific Ocean	Hydrothermal vent microbial communiites from Tahi Moana, Eastern Lau Basin, Pacific Ocean	Oak Ridge National Laboratory					2213	Tahi Moana, Lau Basin, Pacific Ocean	Chimney sample collected with Jason2	-22	-176	2009/1/1	53343836	136388	no
3300028417	Ga0256834	Marine microbial communities from hydrothermal vents in the Atlantic and Pacific Ocean	Hydrothermal vent microbial communities from East Pacific Rise, Pacific Ocean - 4281-140	DOE Joint Genome Institute (JGI)		SAMN10350644	SRX5246603	Illumina HiSeq 2500-1TB	2510	Pacific Ocean: East Pacific Rise	Hydrothermal sulfide rock	9.8384	-104.291	2006/12/1	406215226	718778	yes
2993917433	Ga0523253	Thermotomaculum hydrothermale AC55 genome sequencing	Thermotomaculum hydrothermale AC55	Japan Agency for Marine-Earth Science and Technology		SAMD00052586		ABI 3730, 454 GS FLX		Japan: Mid-Okinawa Trough, Hatoma Knoll		24.52	123.51		2317141	2178	no
3300028900	Ga0310054	Axial Seamount Reassemblies	Diffuse hydrothermal flow volcanic vent microbial communities from Axial Seamount, northeast Pacific ocean - Sample FS915_Marker113_DNA IDBA_UD reassembly	Marine Biological Laboratory				Illumina NextSeq	1520	Marker113 Vent, Axial Seamount, northeast Pacific Ocean	Marker113 Vent, Axial Seamount, northeast Pacific Ocean	45.9228	-129.988	2015/8/25	562757777	1344885	yes
3300015246	Ga0183266	Seawater microbial communities from hydrothermal vent in East China Sea, Taiwan, China	Seawater microbial communities from hydrothermal vent in East China Sea, Taiwan, China - gui-2014 bottom metaT	BGI Tech Solutions Co., Ltd.				Illumina HiSeq 2000		taiwan province,china	bottom of the hydrothermal vent	25	128		20613247	50273	no
2836510713	Ga0400629	Hydrothermal Fe-rich Mat Reference Genomes	Unclassified Zetaproteobacteria bacterium 479-BS3_FULL_No.3_3.0_26	Oregon Health and Science University (OHSU)											651792	876	no
2728369424	Ga0180929	Deep subsurface and oceanic microbial communities from Witwatersrand Basin, South Africa, and the Canadian and Fennoscandian shields and at the Lost City Hydrothermal Field	Desulfarculaceae bacterium JdFR-98	DOE Joint Genome Institute (JGI)											932589	1063	no
2616644911	Ga0072717	Hydrothermal vent microbial communities from Crab Spa hydrothermal vent, East Pacific Rise	Halomonas sp. SCGC AD-702-P13 (contamination screened)	Bigelow Laboratory Single Cell Genomics Center (SCGC)				Illumina		Pacific Ocean: East Pacific Rise, Crab Spa		9.83997	-104.294		298520	307	no
3300001681	Ga0012984	Black smokers hydrothermal plume microbial communities from Abe, Lau Basin, Pacific Ocean	Black smokers hydrothermal plume microbial communities from Abe, Lau Basin, Pacific Ocean - IDBA	University of Michigan				Illumina HiSeq 2000		Abe, ELSC, Pacific Ocean	Abe, ELSC, Pacific Ocean	-20.1113	-176.989		429147887	672341	no
3300005793	Ga0079404	Diffuse hydrothermal flow volcanic vent microbial communities from Axial Seamount, northeast Pacific Ocean	Diffuse hydrothermal flow volcanic vent microbial communities from Axial Seamount, northeast Pacific ocean. Combined Assembly of Gp0107627, Gp0107629, Gp0119879, Gp0119880, Gp0119881, Gp0107619	The Marine Biological Laboratory, Marine Biological Laboratory				Illumina	1542	North Pacific Ocean: Axial Seamount	Anemone diffuse flow vent, Axial seamount	n/a	n/a		116800075	155527	no
2836474636	Ga0400597	Hydrothermal Fe-rich Mat Reference Genomes	Unclassified Zetaproteobacteria bacterium 667-BS4_FULL_No.8_2.9_22	University of Delaware											988404	1243	no
3300006077	Ga0081594	Microbial communities in diffuse hydrothermal fluids of Manus Basin, Bismarck Sea	Microbial communities in diffuse hydrothermal fluids of Manus Basin, Bismarck Sea - fluid B	Max Planck Institute for Plant Breeding Research						Manus Basin, Bismarck Sea	diffuse hydrothermal fluid	-3.79926	152.101		528852717	771392	yes
2617270839	Ga0073554	Genome sequencing of Thermotogales isolates from hydrothermal vents	Thermosipho melanesiensis 430	Norwegian Sequencing Centre (NSC)		SAMN03284847		Illumina MiSeq		Pacific ocean, Lau Basin	Pacific Ocean, Lau Basin				1906053	1887	no
2728369455	Ga0180873	Deep subsurface and oceanic microbial communities from Witwatersrand Basin, South Africa, and the Canadian and Fennoscandian shields and at the Lost City Hydrothermal Field	Cupriavidus sp. JdFR-90	DOE Joint Genome Institute (JGI)											2666033	3032	no
2616644916	Ga0072825	Hydrothermal vent microbial communities from Crab Spa hydrothermal vent, East Pacific Rise	Bacteroidetes bacterium SCGC AD-726-B06 (unscreened)	Bigelow Laboratory Single Cell Genomics Center (SCGC)				Illumina		Pacific Ocean: East Pacific Rise, Crab Spa		9.83997	-104.294		1992123	1693	no
3300004069	Ga0063354	Deep subsurface and oceanic microbial communities from Witwatersrand Basin, South Africa, and the Canadian and Fennoscandian shields and at the Lost City Hydrothermal Field	Combined assembly of 1362B_J2.571 and 1362A_J2.573	DOE Joint Genome Institute (JGI)		SAMN03166137	SRX753337, SRX1880758	Illumina HiSeq 2500	454	Juan de Fuca Ridge flank, Pacific Ocean	Juan de Fuca Ridge flank, Pacific Ocean	n/a	n/a	2011/7/12	390457103	978132	no
2982400160	Ga0577252	Genome sequencing of Thermotogales isolates from hydrothermal vents	Marinitoga sp. 1135	Norwegian Sequencing Centre (NSC)		SAMN03483422		Illumina MiSeq		Pacific Ocean, East Pacific Rise	Pacific Ocean, East Pacific Rise				2212041	2144	no
3300014847	Ga0182795	Microbial community analysis of hydrothermal vent diffuse flow samples from Mid-Cayman Rise, Pacific Ocean	Microbial community analysis of hydrothermal vent diffuse flow samples from Mid-Cayman Rise, Pacific Ocean - FS866 IDBA reassembly (rename)	Marine Biological Laboratory					2293	Mid-Cayman Rise	Mid-Cayman Rise diffuse flow	18.37	-81.798	2013/6/21	55544988	78826	yes
8086292788	Ga0630604	Tepidibacter hydrothermalis SWIR-1 genome sequencing	Tepidibacter hydrothermalis SWIR-1	Institute of Deep-Sea Science and Engineering, CAS		SAMN33842187		Oxford Nanopore PromethION	2770	Indian Ocean		-37.78	49.65		4161809	4194	no
3300050937	Ga0504815	Sorted cell/s from hydrothermal vent fluid, Lost City Hydrothermal field, North Atlantic Ocean	Sorted cell/s from hydrothermal vent fluid, Lost City Hydrothermal field, North Atlantic Ocean - AH-956-D10	DOE Joint Genome Institute (JGI)		SAMN49218527	SRX29499405	Illumina NovaSeq S4		North Atlantic Ocean	hydrothermal vent fluid	30.1197	-42.1244	2018/9/21	435664	465	no
3300009427	Ga0120404	Microbial community analysis of hydrothermal vent diffuse flow samples from Mid-Cayman Rise, Pacific Ocean	Microbial community analysis of hydrothermal vent diffuse flow samples from Mid-Cayman Rise, Pacific Ocean - FS848 no min length	Marine Biological Laboratory				Illumina MiSeq	2308	Mid-Cayman Rise	hydrothermal vent diffuse flow fluids	18.3769	-81.7979	2012/1/19	400380383	1847081	no
2728369450	Ga0180883	Deep subsurface and oceanic microbial communities from Witwatersrand Basin, South Africa, and the Canadian and Fennoscandian shields and at the Lost City Hydrothermal Field	Candidatus Hydrothermae bacterium JdFR-72	DOE Joint Genome Institute (JGI)											2059798	2006	no
3300042034	Ga0451322	Mollusc gills microbial communities from various hydrothermal vent in Atlantic Ocean	Mollusc gills microbial communities from Semeiov-Ash lighthouse hydrothermal vent, Atlantic Ocean - BputSym_Se-AL_1_1115A	Max Planck Institute for Marine Microbiology		SAMEA5664339	ERX3367188		2432	North Atlantic Ocean	mollusc gills	13.5135	-44.9631	2014/11/22	12822085	16724	no
3300013385	Ga0177919	Tubeworm-associated microbial communities from Endeavour hydrothermal vents, Juan de Fuca Ridge, Canada	Tubeworm-associated microbial communities from Endeavour hydrothermal vents, Juan de Fuca Ridge, Canada - high-flow bush	Genome Quebec				Illumina HiSeq	2180	Endeavour Segment, Juan de Fuca Ridge, Canada	Base of tubeworm bush	48.1775	-129.337	2008	130781816	397358	no
2893488153	Ga0454294	Hydrothermal Fe-rich Mat Reference Genomes	Unclassified Deltaproteobacteria bacterium S19_FULL_No.4_1.2_90	University of Delaware											2864706	2923	no
3300001675	Ga0012559	Alviniconcha endosymbiont microbial communities from the Eastern Lau Spreading center hydrothermal vents, Pacific Ocean	Alviniconcha endosymbiont microbial communities from the Eastern Lau Spreading center hydrothermal vents, Pacific Ocean - Gamma1_v2	Harvard University				Illumina HiSeq 2000	2145.75	Eastern Lau Spreading Center, Pacific Ocean	Eastern Lau Spreading Center, Pacific Ocean	-20.7639	-176.192	2009/5/25	3670706	4185	no
2728369308	Ga0180906	Deep subsurface and oceanic microbial communities from Witwatersrand Basin, South Africa, and the Canadian and Fennoscandian shields and at the Lost City Hydrothermal Field	Archaeoglobus sp. JdFR-37	DOE Joint Genome Institute (JGI)											1972400	2239	no
3300005755	Ga0077835	Microbial community analysis of hydrothermal vent diffuse flow samples from Mid-Cayman Rise, Pacific Ocean	Microbial community analysis of hydrothermal vent diffuse flow samples from Mid-Cayman Rise, Pacific Ocean - FS849	Marine Biological Laboratory				Illumina HiSeq	2297	Mid-Cayman Rise	FS841 Mid-Cayman Rise diffuse flow	18.3767	-81.7981	2012/1/19	380429	494	no
3300019445	Ga0193921	Microbial communities from sediments and microbial mats in various locations	Sorted cell/s from Southern Trench hydrothermal vent sediment, Guaymas Basin, Mexico - 6I_4867_11_01	DOE Joint Genome Institute (JGI)		SAMN08776955	SRX3974061	Illumina NextSeq-HO	1826	Mexico: Guaymas Basin	sediment from Guaymas 9A/Octopus Mound, hydrate site	27.4667	-110.533	2016/12/18	7131952	8201	no
2728369438	Ga0180861	Deep subsurface and oceanic microbial communities from Witwatersrand Basin, South Africa, and the Canadian and Fennoscandian shields and at the Lost City Hydrothermal Field	Nitrospirae bacterium JdFR-85	DOE Joint Genome Institute (JGI)											2325903	2387	no
3300028843	Ga0310045	Axial Seamount Reassemblies	Marine deep subsurface microbial communities from hydrothermal vents in Axial Seamount, Pacific Ocean - FS898_N3Area_DNA IDBA_UD reassembly	The Marine Biological Laboratory		SAMEA3143271	ERX639150, ERX639152, ERX639145, ERX639139, ERX639135, ERX639133, ERX639134, ERX639151, ERX639141, ERX639142, ERX639153, ERX639140, ERX639148, ERX639144, ERX639154, ERX639136, ERX639147, ERX639143, ERX639138, ERX639155, ERX639146, ERX639149, ERX639137	Illumina HiSeq 1000		Pacific Ocean: Axial Seamount	Low temperature diffuse fluid vents	45.9437	-129.985	2013	754439982	1450199	yes
2836555431	Ga0400671	Hydrothermal Fe-rich Mat Reference Genomes	Unclassified Zetaproteobacteria bacterium 482-BS8_FULL_No.3_2.0_99	Western Washington University											2732445	2657	no
3300008648	Ga0103610	Microbial communities from hydrothermal vents in Mid Cayman Rise, Atlantic Ocean	Microbial communities from hydrothermal vents in Mid Cayman Rise, Atlantic Ocean - CTD-11-60	University of Michigan		SAMN03609703	SRX1043720	Illumina HiSeq 2500		Atlantic Ocean	Atlantic Ocean,Mid Cayman Rise			2012/1	8565479	36365	no
3300005750	Ga0077563	Microbial community analysis of hydrothermal vent diffuse flow samples from Mid-Cayman Rise, Pacific Ocean	Microbial community analysis of hydrothermal vent diffuse flow samples from Mid-Cayman Rise, Pacific Ocean - FS851	Marine Biological Laboratory				Illumina HiSeq	4988	Mid-Cayman Rise	diffuse flow hydrothermal vent	18.5472	-81.7182	2012/1/20	9116160	11747	no
3300042703	Ga0454357	Microbial symbiotic communities from bathmodiolin mussel gills	Mollusc gills microbial communities from Lucky Strike-Montsegur hydrothermal vent, Atlantic Ocean - BazoSym_LS-MS_2_1048G Re-assembly	Max Planck Institute for Marine Microbiology		SAMEA5664343	ERX3367192	Illumina HiSeq 2500	1700	North Atlantic Ocean	mollusc gills	37.2881	-32.2756	2013/8/9	7226567	10358	no
2836434084	Ga0400564	Hydrothermal Fe-rich Mat Reference Genomes	Unclassified Zetaproteobacteria bacterium 664-BS3_FULL_No.3_0.8_33	University of Delaware											719061	799	no
3300019440	Ga0193925	Microbial communities from sediments and microbial mats in various locations	Sorted cell/s from Southern Trench hydrothermal vent sediment, Guaymas Basin, Mexico - 6O_4868_13_01	DOE Joint Genome Institute (JGI)		SAMN08776954	SRX3974097	Illumina NextSeq-HO	2002	Mexico: Guaymas Basin	hydrothermal vent brown sediment near microbial mat from Ultra Mound, Coring site 2, gradient	27.001	-110.6	2016/12/19	5569001	6024	no
3300050926	Ga0504802	Sorted cell/s from hydrothermal vent fluid, Lost City Hydrothermal field, North Atlantic Ocean	Sorted cell/s from hydrothermal vent fluid, Lost City Hydrothermal field, North Atlantic Ocean - AH-954-J13	DOE Joint Genome Institute (JGI)		SAMN49208314	SRX29496304	Illumina NovaSeq S4		North Atlantic Ocean	hydrothermal vent fluid	30.1194	-42.1248	2018/9/21	888535	968	no
3300041922	Ga0454710	Diffuse hydrothermal flow volcanic vent microbial communities from Axial Seamount, northeast Pacific Ocean	Diffuse hydrothermal flow volcanic vent microbial communities from Axial Seamount, northeast Pacific ocean - Sample FS917_Marker33_DNA re-assembly	Marine Biological Laboratory				Illumina NextSeq	1518	Marker33 Vent, Axial Seamount, northeast Pacific Ocean	Marker33 Vent, Axial Seamount, northeast Pacific Ocean	45.9332	-129.982	2015/8/26	507537381	1031431	yes
3300042028	Ga0451312	Mollusc gills microbial communities from various hydrothermal vent in Atlantic Ocean	Mollusc gills microbial communities from Lilliput hydrothermal vent, Atlantic Ocean - BspSym_Li_3_10-5	Max Planck Institute for Marine Microbiology		SAMEA5664329	ERX3367178	Illumina HiSeq 2500	1494	South Atlantic Ocean	mollusc gills	-9.54817	-13.2088	2009/4/29	149338069	172835	no
3300002589	Ga0041814	Diffuse hydrothermal flow volcanic vent microbial communities from Axial Seamount, northeast Pacific Ocean	Diffuse hydrothermal flow volcanic vent microbial communities from Axial Seamount, northeast Pacific ocean - Sample FS903_30_13H	The Marine Biological Laboratory					1522	Marker 113, Axial Seamount, Northeast Pacific Ocean	Marker 113 diffuse flow vent, Axial Seamount	45.9227	-129.988		2055092	5267	no
3300007720	Ga0105673	Diffuse hydrothermal flow volcanic vent microbial communities from Axial Seamount, northeast Pacific Ocean	Diffuse hydrothermal flow volcanic vent microbial communities from Axial Seamount, northeast Pacific ocean - Sample FS914_Anemone_RNA CLC_assembly	Marine Biological Laboratory				Illumina NextSeq	1541	Northeast Pacific Ocean: Anemone vent, Axial Seamount	Anemone Vent, Axial Seamount, northeast Pacific Ocean	45.9332	-130.014	2015/8/24	344530	669	no
3300041962	Ga0456188	Diffuse hydrothermal flow volcanic vent microbial communities from Axial Seamount, northeast Pacific Ocean	Diffuse hydrothermal flow volcanic vent microbial communities from Axial Seamount, northeast Pacific ocean - Sample FS904_Marker33_DNA SE_2020	The Marine Biological Laboratory				Illumina	1516	North Pacific Ocean: Axial Seamount	Marker 33 diffuse flow vent, Axial Seamount	45.9332	-129.982		214877013	439288	yes
3300050921	Ga0504797	Sorted cell/s from hydrothermal vent fluid, Lost City Hydrothermal field, North Atlantic Ocean	Sorted cell/s from hydrothermal vent fluid, Lost City Hydrothermal field, North Atlantic Ocean - AH-954-G16	DOE Joint Genome Institute (JGI)		SAMN49208321	SRX29505410	Illumina NovaSeq S4		North Atlantic Ocean	hydrothermal vent fluid	30.1194	-42.1248	2018/9/21	727013	893	no
3300050912	Ga0504788	Sorted cell/s from hydrothermal vent fluid, Lost City Hydrothermal field, North Atlantic Ocean	Sorted cell/s from hydrothermal vent fluid, Lost City Hydrothermal field, North Atlantic Ocean - AH-954-C19	DOE Joint Genome Institute (JGI)		SAMN49221001	SRX29498814	Illumina NovaSeq S4		North Atlantic Ocean	hydrothermal vent fluid	30.1194	-42.1248	2018/9/21	1339297	1385	no
2728369319	Ga0180889	Deep subsurface and oceanic microbial communities from Witwatersrand Basin, South Africa, and the Canadian and Fennoscandian shields and at the Lost City Hydrothermal Field	Thermoplasmatales archaeon JdFR-43	DOE Joint Genome Institute (JGI)											1230939	1406	no
3300009465	Ga0120407	Microbial community analysis of hydrothermal vent diffuse flow samples from Mid-Cayman Rise, Pacific Ocean	Microbial community analysis of hydrothermal vent diffuse flow samples from Mid-Cayman Rise, Pacific Ocean - FS842 no min length	Marine Biological Laboratory				Illumina MiSeq	2388	Mid-Cayman Rise, Pacific Ocean	Ravelin #2 hydrothermal vent FS842	18.3752	-81.7971	2012/1/17	152766066	614373	yes
2772191014	Ga0262979	Hydrothermal Fe-rich Mat Reference Genomes	Unclassified Zetaproteobacteria bacterium S6_FULL_No.15_1.3_92	University of Delaware											2184607	2259	no
8054789429	Ga0616807	Croceicoccus hydrothermalis JLT1 genome sequencing	Croceicoccus hydrothermalis JLT1	Xiamen University		SAMN20742868		Illumina HiSeq			sea water				3556066	3576	no
2836483167	Ga0400607	Hydrothermal Fe-rich Mat Reference Genomes	Unclassified Zetaproteobacteria bacterium 667-BS4_FULL_No.17_1.2_48	University of Delaware											1623737	1928	no
3300025163	Ga0209410	Bacterial and archaeal communities from various locations to study Microbial Dark Matter (Phase II)	Marine hydrothermal vent microbial communities from Guaymas Basin, Gulf of California to study Microbial Dark Matter (Phase II) - Marker 14 Mat core 4571-4 3-6 cm metaG (SPAdes) (version 3)	DOE Joint Genome Institute (JGI)		SAMN06264874	SRX2525221	Illumina HiSeq 2500-1TB	2000	Mexico: Guaymas Basin, Gulf of California	marine hydrothermal sediment	27.0078	-111.407	2009/12/2	612561596	1305276	yes
3300048632	Ga0496627	Hydrothermal vents viral and microbial communities from various locations in Pacific Ocean	Hydrothermal vent plume microbial communities from North Pacific Ocean - CTD009A	DOE Joint Genome Institute (JGI)		SAMN51148490	SRX30606959	Illumina NovaSeq S4	2473	North Pacific Ocean	Pelagic ocean, hydrothermal vent plume	9.839	-104.291	2018/12/13	362963926	630708	no
3300021973	Ga0232635	Characterization of microbial community from Mariana Back Arc	Hydrothermal fluids microbial communities from Mariana Back-Arc Basin vent fields, Pacific Ocean - Alice_FS923 _150kmer	Marine Biological Laboratory				Illumina NextSeq	3610	Alice Springs vent field, Mariana back arc basin	Alice Springs vent field	18.2103	144.707	2016/12/6	301773984	650691	yes
2836502095	Ga0400625	Hydrothermal Fe-rich Mat Reference Genomes	Unclassified Zetaproteobacteria bacterium 476-BS1_FULL_No.1_3.1_100	Western Washington University											1994657	2232	no
3300003951	Ga0064030	Diffuse hydrothermal flow volcanic vent microbial communities from Axial Seamount, northeast Pacific Ocean	Diffuse hydrothermal flow volcanic vent microbial communities from Axial Seamount, northeast Pacific ocean - Sample FS907_80_12L10	Marine Biological Laboratory				Illumina HiSeq 1000	1542	Northeast Pacific Ocean: Anemone vent, Axial Seamount	Anemone diffuse flow vent, Axial seamount	45.933	-130.014		1332117	3465	no
2836399672	Ga0400539	Hydrothermal Fe-rich Mat Reference Genomes	Unclassified Zetaproteobacteria bacterium S19_FULL_No.5_1.2_40	University of Delaware											972655	1143	no
3300008543	Ga0103607	Microbial communities from hydrothermal vents in Mid Cayman Rise, Atlantic Ocean	Microbial communities from hydrothermal vents in Mid Cayman Rise, Atlantic Ocean - CTD-08-49	University of Michigan		SAMN03609700	SRX1043696	Illumina HiSeq 2500		Atlantic Ocean	Atlantic Ocean,Mid Cayman Rise			2012/1	28874195	107741	no
3300050935	Ga0504813	Sorted cell/s from hydrothermal vent fluid, Lost City Hydrothermal field, North Atlantic Ocean	Sorted cell/s from hydrothermal vent fluid, Lost City Hydrothermal field, North Atlantic Ocean - AH-954-P09	DOE Joint Genome Institute (JGI)		SAMN49208307	SRX29500277	Illumina NovaSeq S4		North Atlantic Ocean	hydrothermal vent fluid	30.1194	-42.1248	2018/9/21	1349869	1331	no
3300026488	Ga0256838	Marine microbial communities from hydrothermal vents in the Atlantic and Pacific Ocean	Hydrothermal vent microbial communities from Guaymas Basin, Mexico - 4571-419	DOE Joint Genome Institute (JGI)		SAMN09093796	SRX4801605	Illumina HiSeq 2500-1TB	1990	Mexico: Guaymas Basin	Hydrothermal sulfide rock	27.0105	111.407	2010/12/2	304035269	494359	yes
2836569565	Ga0400679	Hydrothermal Fe-rich Mat Reference Genomes	Unclassified Zetaproteobacteria bacterium 482-BS8_FULL_No.11_0.5_79	Western Washington University											1557723	1771	no
3300042699	Ga0454324	Microbial symbiotic communities from bathmodiolin mussel gills	Mollusc gills microbial communities from Clueless hydrothermal vent, Atlantic Ocean - BspSym_Cl_4_11-5 Re-assembly	Max Planck Institute for Marine Microbiology		SAMEA5664333	ERX3367182	Illumina HiSeq 2500	2972	South Atlantic Ocean	mollusc gills	-4.80327	-12.3718	2009/4/22	313216912	282819	no
2728369457	Ga0180941	Deep subsurface and oceanic microbial communities from Witwatersrand Basin, South Africa, and the Canadian and Fennoscandian shields and at the Lost City Hydrothermal Field	Dehalococcoides sp. JdFR-57	DOE Joint Genome Institute (JGI)											776292	948	no
3300003949	Ga0064034	Diffuse hydrothermal flow volcanic vent microbial communities from Axial Seamount, northeast Pacific Ocean	Diffuse hydrothermal flow volcanic vent microbial communities from Axial Seamount, northeast Pacific ocean - Sample FS908_80_13H7	Marine Biological Laboratory				Illumina HiSeq 1000	1516	Marker 33 diffuse flow vent, Axial Seamount	Marker 33 diffuse flow vent, Axial Seamount	45.9332	-129.982		991617	2925	no
3300050930	Ga0504806	Sorted cell/s from hydrothermal vent fluid, Lost City Hydrothermal field, North Atlantic Ocean	Sorted cell/s from hydrothermal vent fluid, Lost City Hydrothermal field, North Atlantic Ocean - AH-954-L06	DOE Joint Genome Institute (JGI)		SAMN49212186	SRX29497903	Illumina NovaSeq S4		North Atlantic Ocean	hydrothermal vent fluid	30.1194	-42.1248	2018/9/21	213058	287	no
3300021467	Ga0190334	Microbial communities from sediments and microbial mats in various locations	Hydrothermal vent sediment bacterial communities from Southern Trench, Guaymas Basin, Mexico - 4872-04-7-8_MG	DOE Joint Genome Institute (JGI)		SAMN08779461	SRX30218239	Illumina HiSeq 2500-1TB	2011	Mexico: Guaymas Basin	Cathedral Hill gradient site, bare sediment just outside mat	27.0114	-110.596	2016/12/24	378956998	775933	yes
3300003538	Ga0060332	Diffuse hydrothermal flow volcanic vent microbial communities from Axial Seamount, northeast Pacific Ocean	Diffuse hydrothermal flow volcanic vent microbial communities from Axial Seamount, northeast Pacific ocean - Sample FS904_Marker33_DNA	The Marine Biological Laboratory				Illumina	1516	North Pacific Ocean: Axial Seamount	Marker 33 diffuse flow vent, Axial Seamount	45.9332	-129.982		210579501	481647	no
3300031937	Ga0326355	Microbial communities from the deep biosphere	Hydrothermal vent fluid microbial communities from New Bay of Prony, New Caledonia - Prony27 re-assembly	Marine Biological Laboratory		SAMN03154341	SRX748869	Illumina HiSeq 1000	43	New Caledonia: Bay of Prony	Hydrothermal vent fluid	-22.3609	166.88	2005/6/14	27625501	72451	no
2639763116	Ga0098342	Genome sequence of Vibrio diabolicus CNCM I-1629 isolated from a deep-sea hydrothermal vent	Vibrio diabolicus CNCM I-1629	Roscoff Center for Oceanography		SAMEA2591299									5132517	4945	no
3300010899	Ga0137520	Diffuse hydrothermal flow volcanic vent microbial communities from Axial Seamount, northeast Pacific Ocean	Diffuse hydrothermal flow volcanic vent microbial communities from Axial Seamount, northeast Pacific ocean - Sample LVWS6_30_TP1_12H	Marine Biological Laboratory				Illumina HiSeq 1000	1516	Marker 33, Axial Seamount, Northeast Pacific Ocean	Marker 33 diffuse flow vent, Axial Seamount	45.9332	-129.982	2014/8	580354	2041	no
3300023313	Ga0256748	Hydrothermal Fe-rich Mat Reference Genomes	Hydrothermal Fe-rich mat microbial community from Urashima Vent Field, Mariana Arc, Pacific Ocean - 801-BM1-B4	University of Delaware				Illumina HiSeq 2500	2929.9	International: Urashima Vent Field, Mariana Arc	Golden Horn Chimney	12.9223	143.649	2014/12/17	224728852	372212	no
3300010887	Ga0137532	Diffuse hydrothermal flow volcanic vent microbial communities from Axial Seamount, northeast Pacific Ocean	Diffuse hydrothermal flow volcanic vent microbial communities from Axial Seamount, northeast Pacific ocean - Sample LVWS6_55_TP2_13H	Marine Biological Laboratory				Illumina HiSeq 1000	1516	Marker 33, Axial Seamount, Northeast Pacific Ocean	Marker 33 diffuse flow vent, Axial Seamount	45.9332	-129.982	2014/8	69296	176	no
3300002593	Ga0041824	Ridgeia piscesae microbial communities from Northeast Pacific Ocean hydrothermal vents	Host-associated microbial community of the tubeworm Ridgeia piscesae from hydrothermal vents Sample -index 11 (Hulk HF)	Canada's Michael Smith Genome Sciences Centre				Illumina MiSeq, Illumina HiSeq	2190	Pacific Ocean	Pacific Ocean	47.95	-129.084	2010/1/1	4809763	7858	no
3300008702	Ga0103614	Microbial communities from hydrothermal vents in Mid Cayman Rise, Atlantic Ocean	Microbial communities from hydrothermal vents in Mid Cayman Rise, Atlantic Ocean - CTD-06-46	University of Michigan		SAMN03609707	SRX1043667	Illumina HiSeq 2500		Atlantic Ocean	Atlantic Ocean,Mid Cayman Rise			2012/1	32147388	107417	no
2630968211	Ga0078069	Single Amplified Genomes from Iheya North hydrothermal field in the Okinawa Trough	Anaerolinea sp. SCGC AB-790-B16 (contamination screened)	Bigelow Laboratory Single Cell Genomics Center (SCGC)				Illumina		Pacific Ocean	Okinawa Trough				1258475	1249	no
3300019533	Ga0193934	Microbial communities from sediments and microbial mats in various locations	Sorted cell/s from Southern Trench hydrothermal vent sediment, Guaymas Basin, Mexico - 6Z_4869_02_14	DOE Joint Genome Institute (JGI)		SAMN08778859	SRX3974361	Illumina NextSeq-HO	2001	Mexico: Guaymas Basin	hydrothermal vent brown sediment from Ultra Mound, gradient site	27.001	-110.6	2016/12/21	33608	36	no
3300010906	Ga0137768	Diffuse hydrothermal flow volcanic vent microbial communities from Axial Seamount, northeast Pacific Ocean	Diffuse hydrothermal flow volcanic vent microbial communities from Axial Seamount, northeast Pacific ocean - Sample FS917_55_12C_TP1_INC3_8	Marine Biological Laboratory				Illumina HiSeq 1000	1516	Marker 33, Axial Seamount, Northeast Pacific Ocean	Marker 33 diffuse flow vent, Axial Seamount	45.9332	-129.982	2015/8	1842743	3252	yes
3300008466	Ga0115368	Marine sediment microbial communities from shallow-sea hydrothermal vent, Milos, Greece	Marine sediment microbial communities from shallow-sea hydrothermal vent, Milos, Greece - WM7	National Aeronautics and Space Administration (NASA)				Illumina HiSeq	0.010000 to 0.200000	Milos, Greece	marine sediment	36.6749	24.5209	2014/5/24	13680492	29044	no
3300019154	Ga0196325	Microbial communities from hydrothermal vent in East Pacific Rise, Pacific Ocean	Fluid microbial communities from hydrothermal vent in East Pacific Rise, Pacific Ocean - LVP4	Bigelow Laboratory for Ocean Sciences				Illumina	2500	East Pacific Rise, Pacific Ocean	Hydrothermal vent fluid	9.84	-104.29	2014/1/10	13473192	35222	no
3300042707	Ga0454325	Microbial symbiotic communities from bathmodiolin mussel gills	Mollusc gills microbial communities from Clueless hydrothermal vent, Atlantic Ocean - BspSym_Cl_5_11-6 Re-assembly	Max Planck Institute for Marine Microbiology		SAMEA5664332	ERX3367181	Illumina HiSeq 2500	2972	South Atlantic Ocean	mollusc gills	-4.80327	-12.3718	2009/4/22	162752908	153977	no
3300002768	Ga0047375	Diffuse hydrothermal flow volcanic vent microbial communities from Axial Seamount, northeast Pacific Ocean	Diffuse hydrothermal flow volcanic vent microbial communities from Axial Seamount, northeast Pacific ocean - Sample LVWS1_TP2_12H					Illumina	1522	Marker 113, Axial Seamount, Northeast Pacific Ocean	Marker 113 diffuse flow vent, Axial Seamount	45.9227	-129.988		969187	3414	no
3300003863	Ga0062507	Diffuse hydrothermal flow volcanic vent microbial communities from Axial Seamount, northeast Pacific Ocean	Diffuse hydrothermal flow volcanic vent microbial communities from Axial Seamount, northeast Pacific ocean - Sample FS904_30_13L	Marine Biological Laboratory				Illumina HiSeq 1000	1516	Marker 33 diffuse flow vent, Axial Seamount	Marker 33 diffuse flow vent, Axial Seamount	45.9332	-129.982		2829880	9208	no
3300005814	Ga0078531	Microbial community analysis of hydrothermal vent diffuse flow samples from Mid-Cayman Rise, Pacific Ocean	Microbial community analysis of hydrothermal vent diffuse flow samples from Mid-Cayman Rise, Pacific Ocean - FS877	Marine Biological Laboratory				Illumina HiSeq	2304	Mid Cayman Rise	diffuse flow from Shrimp Buttery, Von Damm, Mid Cayman Rise	18.377	-81.798	2013/6/27	13669619	16795	no
3300039254	Ga0438695	Tubeworm-associated microbial communities from Endeavour hydrothermal vents, Juan de Fuca Ridge, Canada	Tubeworm-associated microbial communities from Endeavour hydrothermal vents, Juan de Fuca Ridge, Canada - low-flow bush MVw13	Dalhousie University				Illumina NextSeq 550	2410	Juan de Fuca Ridge, NE Pacific, Canada	Base of tubeworm bush	48.4553	-129.709	2016/8	902422886	1873348	no
3300010901	Ga0137512	Diffuse hydrothermal flow volcanic vent microbial communities from Axial Seamount, northeast Pacific Ocean	Diffuse hydrothermal flow volcanic vent microbial communities from Axial Seamount, northeast Pacific ocean - Sample LVWS5_55_TP1_12H	Marine Biological Laboratory				Illumina HiSeq 1000	1542	Northeast Pacific Ocean: Anemone vent, Axial Seamount	Anemone diffuse flow vent, Axial Seamount	45.933	-130.014	2014/8	731930	2466	no
3300048634	Ga0496629	Hydrothermal vents viral and microbial communities from various locations in Pacific Ocean	Hydrothermal vent plume microbial communities from North Pacific Ocean - CTD010A	DOE Joint Genome Institute (JGI)		SAMN51146554	SRX30606968	Illumina NovaSeq S4	2476	North Pacific Ocean	Pelagic ocean, hydrothermal vent plume	9.84014	-104.292	2018/12/13	683381073	1127926	no
2728369453	Ga0180877	Deep subsurface and oceanic microbial communities from Witwatersrand Basin, South Africa, and the Canadian and Fennoscandian shields and at the Lost City Hydrothermal Field	Candidatus Acetothermia bacterium JdFR-47	DOE Joint Genome Institute (JGI)											1622290	1806	no
2616644861	Ga0072653	Hydrothermal vent microbial communities from Crab Spa hydrothermal vent, East Pacific Rise	Sulfurovum sp. SCGC AAA036-P16 (contamination screened)	Bigelow Laboratory Single Cell Genomics Center (SCGC)				Illumina		Pacific Ocean: East Pacific Rise, Crab Spa		9.83997	-104.294		179730	193	no
2836453148	Ga0400578	Hydrothermal Fe-rich Mat Reference Genomes	Unclassified Zetaproteobacteria bacterium 664-SC8_FULL_No.9_0.8_18	University of Delaware											492939	602	no
2772191012	Ga0262977	Hydrothermal Fe-rich Mat Reference Genomes	Unclassified Zetaproteobacteria bacterium S6_FULL_No.12_2.2_58	University of Delaware											2089323	2346	no
2772190966	Ga0261638	Hydrothermal Fe-rich Mat Reference Genomes	Unclassified Zetaproteobacteria bacterium S1_SUB10_No.1_79.4_98	University of Delaware											1947607	2065	no
3300050914	Ga0504790	Sorted cell/s from hydrothermal vent fluid, Lost City Hydrothermal field, North Atlantic Ocean	Sorted cell/s from hydrothermal vent fluid, Lost City Hydrothermal field, North Atlantic Ocean - AH-954-D20	DOE Joint Genome Institute (JGI)		SAMN49215509	SRX29499953	Illumina NovaSeq S4		North Atlantic Ocean	hydrothermal vent fluid	30.1194	-42.1248	2018/9/21	646471	747	no
3300003151	Ga0051092	Alvinella pompejana epibiont microbial communities from the East Pacific Rise hydrothermal vent	Alvinella pompejana epibiont microbial communities from the East Pacific Rise hydrothermal vent	SymBio Corporation				Sanger	2500	East Pacific Rise	Alvinella pompejana epibiont	9.8344	-104.284		147567453	266247	no
3300005790	Ga0079401	Diffuse hydrothermal flow volcanic vent microbial communities from Axial Seamount, northeast Pacific Ocean	Diffuse hydrothermal flow volcanic vent microbial communities from Axial Seamount, northeast Pacific ocean - Sample FS906_Marker113_DNA	Marine Biological Laboratory				Illumina HiSeq 1000	1522	North Pacific Ocean: Axial Seamount	Marker 113 diffuse flow vent, Axial Seamount	45.9227	-129.988	2014/8	32784485	41277	no
3300021977	Ga0232639	Characterization of microbial community from Mariana Back Arc	Hydrothermal fluids microbial communities from Mariana Back-Arc Basin vent fields, Pacific Ocean - Hafa_FS925 _150kmer	Marine Biological Laboratory				Illumina NextSeq	3278	Hafa Adai vent field, Mariana back arc basin	Hafa Adai vent field	16.9617	144.869	2016/12/9	623876921	1258924	yes
3300003979	Ga0063037	Diffuse hydrothermal vent microbial communities from Menez Gwen hydrothermal field, Mid Atlantic ridge	Diffuse hydrothermal vent microbial communities from Menez Gwen hydrothermal field, Mid Atlantic ridge - MGW_B	Max Planck Institute for Plant Breeding Research						Mid-Atlantic Ridge	near diffuse venting site				81812881	95573	no
3300023368	Ga0256753	Hydrothermal Fe-rich Mat Reference Genomes	Hydrothermal Fe-rich mat microbial community from Snakepit Site, Mid-Atlantic Ridge, Atlantic Ocean - 667-BS4	University of Delaware				Illumina HiSeq 2500	3504.92	International: Snakepit Site, Mid-Atlantic Ridge	Snakepit Site	23.3691	-44.951	2012/10/26	275647014	431132	no
2616644866	Ga0072658	Hydrothermal vent microbial communities from Crab Spa hydrothermal vent, East Pacific Rise	Sulfurovum sp. SCGC AC-213-D23 (contamination screened)	Bigelow Laboratory Single Cell Genomics Center (SCGC)				Illumina		Pacific Ocean: East Pacific Rise, Crab Spa		9.83997	-104.294		479203	474	no
3300040677	Ga0438894	Tubeworm-associated microbial communities from Endeavour hydrothermal vents, Juan de Fuca Ridge, Canada	Deep seawater microbial communities from Juan de Fuca Ridge, Canada - bkEC	Dalhousie University				Illumina NextSeq 550	2187	Juan de Fuca Ridge, NE Pacific	seawater near hydrothermal vent	47.9631	-129.091	2016/8	239548965	559390	no
3300039236	Ga0438694	Tubeworm-associated microbial communities from Endeavour hydrothermal vents, Juan de Fuca Ridge, Canada	Tubeworm-associated microbial communities from Endeavour hydrothermal vents, Juan de Fuca Ridge, Canada - low-flow bush ECw10	Dalhousie University				Illumina NextSeq 550	2182	Juan de Fuca Ridge, NE Pacific, Canada	Base of tubeworm bush	47.963	-129.091	2016/8	853565760	1580976	no
3300021587	Ga0190351	Microbial communities from sediments and microbial mats in various locations	Hydrothermal vent microbial mat bacterial communities from Southern Trench, Guaymas Basin, Mexico - 4872-13-9-10_MG	DOE Joint Genome Institute (JGI)		SAMN08779104	SRX3982305	Illumina HiSeq 2500-1TB	2011	Mexico: Guaymas Basin	Cathedral Hill gradient site, white microbial mat	27.0114	-110.596	2016/12/24	53786313	138457	yes
2772190961	Ga0261631	Hydrothermal Fe-rich Mat Reference Genomes	Unclassified Zetaproteobacteria bacterium S1_FULL_No.2_4.8_94	University of Delaware											2286907	2320	no
3300040674	Ga0438891	Tubeworm-associated microbial communities from Endeavour hydrothermal vents, Juan de Fuca Ridge, Canada	Tubeworm-associated microbial communities from Endeavour hydrothermal vents, Juan de Fuca Ridge, Canada - diffuse fluids EMf3	Dalhousie University				Illumina NextSeq 550	2195	Juan de Fuca Ridge, NE Pacific	Fluids venting through tubeworm assemblage	47.95	-129.097	2016/8	550598728	1238515	no
2893496078	Ga0454297	Hydrothermal Fe-rich Mat Reference Genomes	Thermodesulfovibrio sp. S19_FULL_No.1_1.8_94	University of Delaware											3020409	3191	no
3300013799	Ga0180404	Microbial community analysis of hydrothermal vent diffuse flow samples from Mid-Cayman Rise, Pacific Ocean	Microbial community analysis of hydrothermal vent diffuse flow samples from Mid-Cayman Rise, Pacific Ocean - FS848 IDBA reassembly	Marine Biological Laboratory				Illumina MiSeq	2308	Mid-Cayman Rise	hydrothermal vent diffuse flow fluids	18.3769	-81.7979	2012/1/19	135175138	288842	yes
2772191013	Ga0262978	Hydrothermal Fe-rich Mat Reference Genomes	Unclassified Zetaproteobacteria bacterium S6_FULL_No.13_1.5_88	University of Delaware											1676896	1830	no
2836553010	Ga0400670	Hydrothermal Fe-rich Mat Reference Genomes	Unclassified Zetaproteobacteria bacterium 482-BS8_FULL_No.2_2.5_96	Western Washington University											2250117	2420	no
3300044607	Ga0485369	Marine microbial communities from various hydrothermal vent chimneys in Pacific Ocean	Marine hydrothermal vent microbial communities from Pagoda chimney, Guaymas Basin, Pacific Ocean - A2838	Western Washington University				Illumina MiSeq	1980	Guaymas Basin, Pacific Ocean	Pagoda Chimney, Guaymas Basin, Pacific Ocean	27.3333	-111.25	2009/6	324566205	637792	yes
3300013787	Ga0180407	Microbial community analysis of hydrothermal vent diffuse flow samples from Mid-Cayman Rise, Pacific Ocean	Microbial community analysis of hydrothermal vent diffuse flow samples from Mid-Cayman Rise, Pacific Ocean - FS852 IDBA reassembly	Marine Biological Laboratory				Illumina HiSeq	4986	Mid-Cayman Rise	diffuse flow fluids, Shrimp Canyon	18.5471	-81.7182	2012/1/2	24101210	29797	yes
3300010919	Ga0137660	Diffuse hydrothermal flow volcanic vent microbial communities from Axial Seamount, northeast Pacific Ocean	Diffuse hydrothermal flow volcanic vent microbial communities from Axial Seamount, northeast Pacific ocean - Sample LVWS4_55_TP1_12H	Marine Biological Laboratory				Illumina HiSeq 1000	1522	Marker 113, Axial Seamount, Northeast Pacific Ocean	Marker 113 diffuse flow vent, Axial Seamount	45.9227	-129.988	2014/8	1868091	6532	no
3300021974	Ga0232645	Characterization of microbial community from Mariana Back Arc	Hydrothermal fluids microbial communities from Mariana Back-Arc Basin vent fields, Pacific Ocean - Perseverance_FS929 _150kmer	Marine Biological Laboratory				Illumina NextSeq	3912	Perseverance vent field, Mariana back arc basin	Perseverance vent field	15.4799	144.508	2016/12/16	472881746	912574	yes
2728369452	Ga0180878	Deep subsurface and oceanic microbial communities from Witwatersrand Basin, South Africa, and the Canadian and Fennoscandian shields and at the Lost City Hydrothermal Field	Candidatus Acetothermia bacterium JdFR-50	DOE Joint Genome Institute (JGI)											1292279	1512	no
3300001781	Ga0013020	Hydrothermal vent plume microbial communities from the Cayman Rise, Cayman Islands	Hydrothermal vent plume microbial communities from the Mid Cayman Rise - Deep Sites	University of Michigan				Illumina HiSeq 2000	4000	Mid Cayman Rise, Cayman Islands, UK	Mid Cayman Rise, multiple sites combined	18.35	-81.85		218214362	314848	no
2616644868	Ga0072660	Hydrothermal vent microbial communities from Crab Spa hydrothermal vent, East Pacific Rise	Deltaproteobacteria SCGC AC-213-K20 (unscreened)	Bigelow Laboratory Single Cell Genomics Center (SCGC)				Illumina		Pacific Ocean: East Pacific Rise, Crab Spa		9.83997	-104.294		884938	853	no
3300050917	Ga0504793	Sorted cell/s from hydrothermal vent fluid, Lost City Hydrothermal field, North Atlantic Ocean	Sorted cell/s from hydrothermal vent fluid, Lost City Hydrothermal field, North Atlantic Ocean - AH-954-G06	DOE Joint Genome Institute (JGI)		SAMN49208326	SRX29505541	Illumina NovaSeq S4		North Atlantic Ocean	hydrothermal vent fluid	30.1194	-42.1248	2018/9/21	806924	882	no
3300000393	Ga0011253	Hydrothermal vent microbial communities from Guaymas and Carmen Basins, Gulf of California	GB background transcript assembly	Pennsylvania State University				Illumina HiSeq 2000	1990	Guaymas Basin, Gulf of California	Guaymas Basin, Gulf of California	27.506	-111.347	2004/7/18	24882164	62319	no
3300039238	Ga0438693	Tubeworm-associated microbial communities from Endeavour hydrothermal vents, Juan de Fuca Ridge, Canada	Tubeworm-associated microbial communities from Endeavour hydrothermal vents, Juan de Fuca Ridge, Canada - low-flow bush ECw9	Dalhousie University				Illumina NextSeq 550		Juan de Fuca Ridge, NE Pacific, Canada	Base of tubeworm bush	47.963	-129.091	2016/8	750071646	1127620	no
3300048637	Ga0496633	Hydrothermal vents viral and microbial communities from various locations in Pacific Ocean	Hydrothermal vent plume microbial communities from North Pacific Ocean - CTD-AT42-06-005-500m-0.65	DOE Joint Genome Institute (JGI)		SAMN51148881	SRX30606994	Illumina NovaSeq S4	500	North Pacific Ocean	Pelagic ocean, hydrothermal vent plume	8.41285	-104.419	2018/12/6	1023716071	1569144	no
3300026521	Ga0256828	Marine microbial communities from hydrothermal vents in the Atlantic and Pacific Ocean	Hydrothermal vent microbial communities from East Pacific Rise, Pacific Ocean - CV88	DOE Joint Genome Institute (JGI)		SAMN09093799	SRX4801599	Illumina HiSeq 2500-1TB	2503	Pacific Ocean: East Pacific Rise	Experimental microbial colonizer placed at the East Pacific Rise	9.8441	-104.297	2014/11/14	395783452	750764	no
2630968209	Ga0078066	Single Amplified Genomes from Iheya North hydrothermal field in the Okinawa Trough	Anaerolineales sp. SCGC AC-715-B04 (contamination screened)	Bigelow Laboratory Single Cell Genomics Center (SCGC)				Illumina		Pacific Ocean	Okinawa Trough				615816	593	no
2616644920	Ga0072829	Hydrothermal vent microbial communities from Crab Spa hydrothermal vent, East Pacific Rise	Sulfurovum sp. SCGC AD-726-J17 (contamination screened)	Bigelow Laboratory Single Cell Genomics Center (SCGC)				Illumina		Pacific Ocean: East Pacific Rise, Crab Spa		9.83997	-104.294		1111394	1177	no
3300053164	Ga0496917	Hydrothermal vents viral and microbial communities from various locations in Pacific Ocean	Metatranscriptome of hydrothermal vent plume microbial communities from Gulf of California, Mexico - CTD-FK190211-025-400m-0.65 (Metagenome Metatranscriptome) (Annotation)	DOE Joint Genome Institute (JGI)		SAMN52640849	SRX30974612, SRX30974613	Illumina NovaSeq S4	400	Mexico: Gulf of California	Pelagic ocean, hydrothermal vent plume	23.9566	-108.862	2019/3/9	148087066	239238	no
3300026512	Ga0256842	Marine microbial communities from hydrothermal vents in the Atlantic and Pacific Ocean	Hydrothermal vent microbial communities from Guaymas Basin, Mexico - 4559-240	DOE Joint Genome Institute (JGI)		SAMN09094699	SRX4801621	Illumina HiSeq 2500-1TB	2009	Mexico: Guaymas Basin	Hydrothermal sulfide rock	27.0067	-111.409	2009/11/14	417525177	737412	yes
3300002592	Ga0041815	Diffuse hydrothermal flow volcanic vent microbial communities from Axial Seamount, northeast Pacific Ocean	Diffuse hydrothermal flow volcanic vent microbial communities from Axial Seamount, northeast Pacific ocean - Sample FS903_55_12H	The Marine Biological Laboratory					1522	Marker 113, Axial Seamount, Northeast Pacific Ocean	Marker 113 diffuse flow vent, Axial Seamount	45.9227	-129.988		1766482	6142	no
3300010908	Ga0137526	Diffuse hydrothermal flow volcanic vent microbial communities from Axial Seamount, northeast Pacific Ocean	Diffuse hydrothermal flow volcanic vent microbial communities from Axial Seamount, northeast Pacific ocean - Sample LVWS6_55_TP1_12H	Marine Biological Laboratory				Illumina HiSeq 1000	1516	Marker 33, Axial Seamount, Northeast Pacific Ocean	Marker 33 diffuse flow vent, Axial Seamount	45.9332	-129.982	2014/8	1053355	3299	no
3300042704	Ga0454356	Microbial symbiotic communities from bathmodiolin mussel gills	Mollusc gills microbial communities from Lucky Strike-Montsegur hydrothermal vent, Atlantic Ocean - BazoSym_LS-MS_1_1048F Re-assembly	Max Planck Institute for Marine Microbiology		SAMEA5664344	ERX3367193	Illumina HiSeq 2500	1700	North Atlantic Ocean	mollusc gills	37.2881	-32.2756	2013/8/9	8783893	12122	no
3300009489	Ga0119759	Microbial community analysis of hydrothermal vent diffuse flow samples from Mid-Cayman Rise, Pacific Ocean	Microbial community analysis of hydrothermal vent diffuse flow samples from Mid-Cayman Rise, Pacific Ocean - FS881 no min length	Marine Biological Laboratory				Illumina HiSeq	2370	Mid Cayman Rise	Old Man Tree, Von Damm, Mid Cayman Rise	18.375	-81.797	2013/6/27	253547219	1004650	yes
3300002766	Ga0047376	Diffuse hydrothermal flow volcanic vent microbial communities from Axial Seamount, northeast Pacific Ocean	Diffuse hydrothermal flow volcanic vent microbial communities from Axial Seamount, northeast Pacific ocean - Sample LVWS1_TP2_12L					Illumina	1522	Marker 113, Axial Seamount, Northeast Pacific Ocean	Marker 113 diffuse flow vent, Axial Seamount	45.9227	-129.988		1076654	2755	no
3300021500	Ga0190347	Microbial communities from sediments and microbial mats in various locations	Hydrothermal vent microbial mat bacterial communities from Southern Trench, Guaymas Basin, Mexico - 4872-13-5-6_MG	DOE Joint Genome Institute (JGI)		SAMN08777291	SRX3982303	Illumina HiSeq 2500-1TB	2011	Mexico: Guaymas Basin	Cathedral Hill gradient site, white microbial mat	27.0114	-110.596	2016/12/24	159679707	329643	yes
3300050000	Ga0496616	Hydrothermal vents viral and microbial communities from various locations in Pacific Ocean	Hydrothermal vent plume viral communities from North Pacific Ocean - CTD-AT42-06-002-1000m-0.03-B v	DOE Joint Genome Institute (JGI)		SAMN51148673	SRX30593895	Illumina NovaSeq S4	1000	North Pacific Ocean	Pelagic ocean, hydrothermal vent plume	8.39977	-104.981	2018/12/6	81907215	234323	no
3300021495	Ga0190352	Microbial communities from sediments and microbial mats in various locations	Hydrothermal vent microbial mat bacterial communities from Southern Trench, Guaymas Basin, Mexico - 4872-13-10-11_MG	DOE Joint Genome Institute (JGI)		SAMN08776763	SRX3982312	Illumina HiSeq 2500-1TB	2011	Mexico: Guaymas Basin	Cathedral Hill gradient site, white microbial mat	27.0114	-110.596	2016/12/24	142764967	312710	yes
2836450018	Ga0400575	Hydrothermal Fe-rich Mat Reference Genomes	Unclassified Zetaproteobacteria bacterium 664-SC8_FULL_No.6_1.3_1	University of Delaware											238602	351	no
3300016457	Ga0186713	Marine sediment microbial communities from ocean floor of Pescadero Basin in Gulf of California	Marine sediment microbial communities near hydrothermal vents on the ocean floor of Pescadero Basin in Gulf of California. Combined Assembly of Gp0212427, Gp0212428, Gp0212429, Gp0212430	Stanford University				Illumina HiSeq 2500	3680	Pescadero Basin, Gulf of California	Marine sediments near hydrothermal vents in Pescadero Basin, Gulf of California	n/a	n/a	2015/4	784989511	824823	yes
3300003480	Ga0060290	Diffuse hydrothermal flow volcanic vent microbial communities from Axial Seamount, northeast Pacific Ocean	Diffuse hydrothermal flow volcanic vent microbial communities from Axial Seamount, northeast Pacific ocean - Sample FS861_Marker113_RNA					Illumina	1522	North Pacific Ocean: Axial Seamount	Diffuse hydrothermal flow volcanic vent	45.923	-129.988	2012/8/1	2079981	6319	no
3300021505	Ga0190327	Microbial communities from sediments and microbial mats in various locations	Hydrothermal vent sediment bacterial communities from Southern Trench, Guaymas Basin, Mexico - 4872-04-0-1_MG	DOE Joint Genome Institute (JGI)		SAMN08776766	SRX3982244	Illumina HiSeq 2500-1TB	2011	Mexico: Guaymas Basin	Cathedral Hill gradient site, bare sediment just outside mat	27.0114	-110.596	2016/12/24	158973755	401829	yes
3300021490	Ga0190330	Microbial communities from sediments and microbial mats in various locations	Hydrothermal vent sediment bacterial communities from Southern Trench, Guaymas Basin, Mexico - 4872-04-3-4_MG	DOE Joint Genome Institute (JGI)		SAMN08779101	SRX3982247	Illumina HiSeq 2500-1TB	2011	Mexico: Guaymas Basin	Cathedral Hill gradient site, bare sediment just outside mat	27.0114	-110.596	2016/12/24	124187887	266662	yes
3300041927	Ga0455662	Diffuse hydrothermal flow volcanic vent microbial communities from Axial Seamount, northeast Pacific Ocean	Diffuse hydrothermal flow volcanic vent microbial communities from Axial Seamount, northeast Pacific ocean - Sample CTDBack_2015_DNA	Marine Biological Laboratory				Illumina NextSeq	1500	Northeast Pacific Ocean	Northeast Pacific Ocean	45.9372	-130.082	2015/8/15	327079780	706973	no
2836521333	Ga0400637	Hydrothermal Fe-rich Mat Reference Genomes	Unclassified Zetaproteobacteria bacterium 479-BS4_FULL_No.6_1.8_70	Western Washington University											1474035	1583	no
2728369454	Ga0180875	Deep subsurface and oceanic microbial communities from Witwatersrand Basin, South Africa, and the Canadian and Fennoscandian shields and at the Lost City Hydrothermal Field	Pseudomonas sp. JdFR-93	DOE Joint Genome Institute (JGI)											2230228	2163	no
3300003332	Ga0058632	Marine hydrothermal vent sediment microbial communities from Guaymas Basin, Gulf of California	Marine hydrothermal vent sediment microbial communities from Guaymas Basin, Gulf of California - Sample 1					Illumina HiSeq 2000	2000	Guyams Basin, Gulf of California, Pacific Ocean	Guyams Basin, Gulf of California, Pacific Ocean	27.01	-111.43	2011/9/1	389261994	580458	no
3300048633	Ga0496628	Hydrothermal vents viral and microbial communities from various locations in Pacific Ocean	Hydrothermal vent plume microbial communities from North Pacific Ocean - CTD009B	DOE Joint Genome Institute (JGI)		SAMN51146500	SRX30606975	Illumina NovaSeq S4	2473	North Pacific Ocean	Pelagic ocean, hydrothermal vent plume	9.839	-104.291	2018/12/13	470391459	789070	no
3300042030	Ga0451314	Mollusc gills microbial communities from various hydrothermal vent in Atlantic Ocean	Mollusc gills microbial communities from Lilliput hydrothermal vent, Atlantic Ocean - BspSym_Li_1_10-2	Max Planck Institute for Marine Microbiology		SAMEA5664331	ERX3367180	Illumina HiSeq 2500	1494	South Atlantic Ocean	mollusc gills	-9.54817	-13.2088	2009/4/29	413360082	455239	no
3300039137	Ga0243147	Sediment and seawater microbial communities from hydrothermal vent in Taiwan, China	Sediment microbial communities from hydrothermal vent in Taiwan, China - YPS	Xiamen University		SAMN06140896	SRX2467570	Illumina MiSeq	8	China: Taiwan	terrigenous sedimen	24.835	121.962	2014/4/28	5633066	13001	no
3300050913	Ga0504789	Sorted cell/s from hydrothermal vent fluid, Lost City Hydrothermal field, North Atlantic Ocean	Sorted cell/s from hydrothermal vent fluid, Lost City Hydrothermal field, North Atlantic Ocean - AH-954-D16	DOE Joint Genome Institute (JGI)		SAMN49213186	SRX29497635	Illumina NovaSeq S4		North Atlantic Ocean	hydrothermal vent fluid	30.1194	-42.1248	2018/9/21	1453243	1542	no
3300010431	Ga0137519	Diffuse hydrothermal flow volcanic vent microbial communities from Axial Seamount, northeast Pacific Ocean	Diffuse hydrothermal flow volcanic vent microbial communities from Axial Seamount, northeast Pacific ocean - Sample LVWS5_55_TP2_13L	Marine Biological Laboratory				Illumina HiSeq 1000	1542	Northeast Pacific Ocean: Anemone vent, Axial Seamount	Anemone diffuse flow vent, Axial Seamount	45.933	-130.014	2014/8	121604	383	yes
3300003531	Ga0060339	Diffuse hydrothermal flow volcanic vent microbial communities from Axial Seamount, northeast Pacific Ocean	Diffuse hydrothermal flow volcanic vent microbial communities from Axial Seamount, northeast Pacific ocean - Sample FS903_Marker113_RNA	The Marine Biological Laboratory				Illumina	1522	North Pacific Ocean: Axial Seamount	Marker 113 diffuse flow vent, Axial Seamount	45.9227	-129.988		3671772	12790	no
3300042035	Ga0451323	Mollusc gills microbial communities from various hydrothermal vent in Atlantic Ocean	Mollusc gills microbial communities from Lucky Strike-Eifeltower hydrothermal vent, Atlantic Ocean - BazoSym_LS-ET_5_1048J	Max Planck Institute for Marine Microbiology		SAMEA5664340	ERX3367189	Illumina HiSeq 2500	1689	North Atlantic Ocean	mollusc gills	37.2829	-32.2756	2013/8/17	7179640	9076	no
2728369420	Ga0180896	Deep subsurface and oceanic microbial communities from Witwatersrand Basin, South Africa, and the Canadian and Fennoscandian shields and at the Lost City Hydrothermal Field	Nitrospirae bacterium JdFR-84	DOE Joint Genome Institute (JGI)											1526138	1828	no
2836519699	Ga0400635	Hydrothermal Fe-rich Mat Reference Genomes	Unclassified Zetaproteobacteria bacterium 479-BS4_FULL_No.4.2_2.6_27	Western Washington University											717641	866	no
3300049898	Ga0496607	Hydrothermal vents viral and microbial communities from various locations in Pacific Ocean	Hydrothermal vent plume viral communities from North Pacific Ocean - CTD-AT42-06-007-2500m-0.03 v	DOE Joint Genome Institute (JGI)		SAMN51148798	SRX30589648	Illumina NovaSeq S4	2500	North Pacific Ocean	Pelagic ocean, hydrothermal vent plume	9.83807	-104.291	2018/12/12	28936667	87790	no
2728369425	Ga0180928	Deep subsurface and oceanic microbial communities from Witwatersrand Basin, South Africa, and the Canadian and Fennoscandian shields and at the Lost City Hydrothermal Field	Desulfarculaceae bacterium JdFR-96	DOE Joint Genome Institute (JGI)											1392811	1529	no
2772191017	Ga0262982	Hydrothermal Fe-rich Mat Reference Genomes	Unclassified Zetaproteobacteria bacterium S6_FULL_No.21_0.9_88	University of Delaware											2061003	2296	no
2836527702	Ga0400641	Hydrothermal Fe-rich Mat Reference Genomes	Unclassified Zetaproteobacteria bacterium 479-BS4_FULL_No.10_1.3_15	Western Washington University											1010429	1137	no
3300010425	Ga0137501	Diffuse hydrothermal flow volcanic vent microbial communities from Axial Seamount, northeast Pacific Ocean	Diffuse hydrothermal flow volcanic vent microbial communities from Axial Seamount, northeast Pacific ocean - Sample LVWS5_30_TP1_12H	Marine Biological Laboratory				Illumina HiSeq 1000	1542	Northeast Pacific Ocean: Anemone vent, Axial Seamount	Anemone diffuse flow vent, Axial Seamount	45.933	-130.014	2014/8	1743078	5121	no
3300003525	Ga0060309	Diffuse hydrothermal flow volcanic vent microbial communities from Axial Seamount, northeast Pacific Ocean	Diffuse hydrothermal flow volcanic vent microbial communities from Axial Seamount, northeast Pacific ocean - Sample FS900_Dependable_RNA					Illumina	1917	North Pacific Ocean: Axial Seamount	Dependable diffuse flow vent, Axial seamount	45.8799	-129.803		1234175	4911	no
2728369436	Ga0180901	Deep subsurface and oceanic microbial communities from Witwatersrand Basin, South Africa, and the Canadian and Fennoscandian shields and at the Lost City Hydrothermal Field	Unclassified bacterium JdFR-66	DOE Joint Genome Institute (JGI)											1838550	2040	no
2617270845	Ga0073566	Genome sequencing of Thermotogales isolates from hydrothermal vents	Thermosipho sp. 1074	Norwegian Sequencing Centre (NSC)		SAMN03483419		Illumina MiSeq		Atlantic ocean, Menez Gwen Hydrothermal vents field	Atlantic ocean, Menez Gwen Hydrothermal vents field	37.8417	-31.525		1788307	1807	no
3300042702	Ga0454358	Microbial symbiotic communities from bathmodiolin mussel gills	Mollusc gills microbial communities from Lucky Strike-Montsegur hydrothermal vent, Atlantic Ocean - BazoSym_LS-MS_3_1048H Re-assembly	Max Planck Institute for Marine Microbiology		SAMEA5664342	ERX3367191	Illumina HiSeq 2500	1700	North Atlantic Ocean	mollusc gills	37.2881	-32.2756	2013/8/9	8298103	12118	no
2728369306	Ga0180908	Deep subsurface and oceanic microbial communities from Witwatersrand Basin, South Africa, and the Canadian and Fennoscandian shields and at the Lost City Hydrothermal Field	Archaeoglobus sp. JdFR-41	DOE Joint Genome Institute (JGI)											1752477	1911	no
8055140161	Ga0616912	Microbial community from the Prony Hydrothermal Field and related strains: Genome sequencing and assembly	Methanobacterium alcaliphilum DSM 3459	Mediterranean Institute of Oceanography (MIO)		SAMN27398541		Illumina		Egypt: Wadi el Natrun	high-pH lake sediment				2359936	2456	no
3300010420	Ga0137504	Diffuse hydrothermal flow volcanic vent microbial communities from Axial Seamount, northeast Pacific Ocean	Diffuse hydrothermal flow volcanic vent microbial communities from Axial Seamount, northeast Pacific ocean - Sample LVWS5_30_TP1_13L	Marine Biological Laboratory				Illumina HiSeq 1000	1542	Northeast Pacific Ocean: Anemone vent, Axial Seamount	Anemone diffuse flow vent, Axial Seamount	45.933	-130.014	2014/8	839528	2767	yes
3300050928	Ga0504804	Sorted cell/s from hydrothermal vent fluid, Lost City Hydrothermal field, North Atlantic Ocean	Sorted cell/s from hydrothermal vent fluid, Lost City Hydrothermal field, North Atlantic Ocean - AH-954-K09	DOE Joint Genome Institute (JGI)		SAMN49208311	SRX29498395	Illumina NovaSeq S4		North Atlantic Ocean	hydrothermal vent fluid	30.1194	-42.1248	2018/9/21	1188422	1215	no
2617270840	Ga0073555	Genome sequencing of Thermotogales isolates from hydrothermal vents	Thermosipho sp. 1063	Norwegian Sequencing Centre (NSC)				PacBio RS		Atlantic Ocean, Menez-Gwen hydrothermal vents	Menez-Gwen	37.8417	-31.525		1766633	1767	no
3300002594	Ga0041819	Diffuse hydrothermal flow volcanic vent microbial communities from Axial Seamount, northeast Pacific Ocean	Diffuse hydrothermal flow volcanic vent microbial communities from Axial Seamount, northeast Pacific ocean - Sample FS903_80_12H	The Marine Biological Laboratory					1522	Marker 113, Axial Seamount, Northeast Pacific Ocean	Marker 113 diffuse flow vent, Axial Seamount	45.9227	-129.988		3566780	11944	no
2836575516	Ga0400682	Hydrothermal Fe-rich Mat Reference Genomes	Unclassified Zetaproteobacteria bacterium 483-BS63_FULL_No.2_5.9_17	Western Washington University											408020	525	no
2728369301	Ga0180922	Deep subsurface and oceanic microbial communities from Witwatersrand Basin, South Africa, and the Canadian and Fennoscandian shields and at the Lost City Hydrothermal Field	Candidatus Bathyarchaeota archaeon JdFR-09	DOE Joint Genome Institute (JGI)											498537	610	no
2728369431	Ga0180847	Deep subsurface and oceanic microbial communities from Witwatersrand Basin, South Africa, and the Canadian and Fennoscandian shields and at the Lost City Hydrothermal Field	Candidatus Aminicenantes bacterium JdFR-79	DOE Joint Genome Institute (JGI)											2046026	1969	no
3300041963	Ga0456193	Diffuse hydrothermal flow volcanic vent microbial communities from Axial Seamount, northeast Pacific Ocean	Diffuse hydrothermal flow volcanic vent microbial communities from Axial Seamount, northeast Pacific ocean - Sample FS915_Marker113_DNA SE_2020	Marine Biological Laboratory				Illumina NextSeq	1520	Marker113 Vent, Axial Seamount, northeast Pacific Ocean	Marker113 Vent, Axial Seamount, northeast Pacific Ocean	45.9228	-129.988	2015/8/25	583619087	1242165	no
2623620619	Ga0078419	Microbial communities of a white smoker hydrothermal vent chimney from the northern part of the Tu’i Malila vent field, Lau Basin, Fiji	Methylococcaceae sp. B42	California Institute of Technology											3040210	2887	no
2836472353	Ga0400596	Hydrothermal Fe-rich Mat Reference Genomes	Unclassified Zetaproteobacteria bacterium 667-BS4_FULL_No.7_3.1_58	University of Delaware											1981938	2282	no
3300044575	Ga0485626	Marine microbial communities from various hydrothermal vent chimneys in Pacific Ocean	Marine hydrothermal vent microbial communities from Snap Snap chimney, Urashima Vent Field, Pacific Ocean - 797SSC	Western Washington University				Illumina MiSeq	2928	Urashima Vent Field, Pacific Ocean	Snap Snap Chimney, Urashima Vent Field, Pacific Ocean	13	144	2014/12	267460965	543682	no
2627853588	Ga0078062	Single Amplified Genomes from Iheya North hydrothermal field in the Okinawa Trough	Anaerolinea sp. SCGC AC-711-E09 (contamination screened)	Bigelow Laboratory Single Cell Genomics Center (SCGC)		SAMN03835545		Illumina		Pacific Ocean	Okinawa Trough				153247	177	no
3300005813	Ga0078767	Microbial community analysis of hydrothermal vent diffuse flow samples from Mid-Cayman Rise, Pacific Ocean	Microbial community analysis of hydrothermal vent diffuse flow samples from Mid-Cayman Rise, Pacific Ocean - FS874	Marine Biological Laboratory				Illumina HiSeq	2369	Mid-Cayman Rise	diffuse flow hydrothermal vent	18.376	-81.797	2013/6/26	11529412	14416	no
3300001387	Ga0012405	Hydrothermal vent plume microbial communities from Lau Basin, Pacific Ocean	Lau MG2c_1					Illumina HiSeq 2000	2600	Lau Basin	Lau Basin hydrothermal plumes	20.32	176.8	2009/6/15	2585461	2614	no
3300028490	Ga0256824	Marine microbial communities from hydrothermal vents in the Atlantic and Pacific Ocean	Hydrothermal vent microbial communities from East Pacific Rise, Pacific Ocean - CV67	DOE Joint Genome Institute (JGI)		SAMN10350736	SRX5246453	Illumina HiSeq 2500-1TB	2507	Pacific Ocean: East Pacific Rise	Experimental microbial colonizer placed at the East Pacific Rise	9.8597	-104.3	2014/1/14	611481128	1337530	no
8071109685	Ga0581314	Chemoautotrophic enrichment from hydrothermal vent	Sulfidibacterium hydrothermale EPR1	Shanghai Jiao Tong University		SAMN21419193		Oxford Nanopore, Illumina NovaSeq	2528	Pacific Ocean	deep-sea hydrothermal vent	9.77	-104.279		3266086	2750	no
2728369413	Ga0180916	Deep subsurface and oceanic microbial communities from Witwatersrand Basin, South Africa, and the Canadian and Fennoscandian shields and at the Lost City Hydrothermal Field	Candidatus Acetothermia bacterium JdFR-52	DOE Joint Genome Institute (JGI)											1710598	1869	no
3300008580	Ga0103611	Microbial communities from hydrothermal vents in Mid Cayman Rise, Atlantic Ocean	Microbial communities from hydrothermal vents in Mid Cayman Rise, Atlantic Ocean - CTD-11-61	University of Michigan		SAMN03609704	SRX1043722	Illumina HiSeq 2500		Atlantic Ocean	Atlantic Ocean,Mid Cayman Rise			2012/1	5945021	25586	no
3300001769	Ga0012999	Hydrothermal vent plume microbial communities from the Cayman Rise, Cayman Islands	Hydrothermal vent plume microbial communities from the Mid Cayman Rise - Shallow Background Supr60	University of Michigan				Illumina HiSeq 2000	2000	Shallow Background, Mid Cayman Rise	Shallow Background, Mid Cayman Rise	18.35	-81.85		109162239	160573	no
3300005751	Ga0077564	Microbial community analysis of hydrothermal vent diffuse flow samples from Mid-Cayman Rise, Pacific Ocean	Microbial community analysis of hydrothermal vent diffuse flow samples from Mid-Cayman Rise, Pacific Ocean - FS852	Marine Biological Laboratory				Illumina HiSeq	4986	Mid-Cayman Rise	diffuse flow fluids, Shrimp Canyon	18.5471	-81.7182	2012/1/2	9306582	11791	no
3300019441	Ga0193911	Microbial communities from sediments and microbial mats in various locations	Sorted cell/s from Southern Trench hydrothermal vent microbial mat, Guaymas Basin, Mexico - 4C_dil_4869_18_11	DOE Joint Genome Institute (JGI)		SAMN08777492	SRX3973874	Illumina NextSeq-HO	2001	Mexico: Guaymas Basin	hydrothermal vent orange microbial mat from Ultra Mound gradient site	27.001	-110.6	2016/12/21	9329115	7383	no
3300044578	Ga0485368	Marine microbial communities from various hydrothermal vent chimneys in Pacific Ocean	Marine hydrothermal vent microbial communities from Castle chimney, Axial Seamount, Pacific Ocean - R674	Western Washington University				Illumina MiSeq	1450	Axial Seamount, Pacific Ocean	Castle Chimney, Axial Seamount, Pacific Ocean	46.06	-130	2002/6	90505095	173475	no
3300050954	Ga0504833	Sorted cell/s from hydrothermal vent fluid, Lost City Hydrothermal field, North Atlantic Ocean	Sorted cell/s from hydrothermal vent fluid, Lost City Hydrothermal field, North Atlantic Ocean - AH-956-N16	DOE Joint Genome Institute (JGI)		SAMN49208273	SRX29496306	Illumina NovaSeq S4		North Atlantic Ocean	hydrothermal vent fluid	30.1197	-42.1244	2018/9/21	1157492	1270	no
3300003738	Ga0062513	Diffuse hydrothermal flow volcanic vent microbial communities from Axial Seamount, northeast Pacific Ocean	Diffuse hydrothermal flow volcanic vent microbial communities from Axial Seamount, northeast Pacific ocean - Sample FS904_80_12L	Marine Biological Laboratory				Illumina HiSeq 1000	1516	Marker 33 diffuse flow vent, Axial Seamount	Marker 33 diffuse flow vent, Axial Seamount	45.9332	-129.982		939276	2645	yes
3300007726	Ga0105705	Diffuse hydrothermal flow volcanic vent microbial communities from Axial Seamount, northeast Pacific Ocean	Diffuse hydrothermal flow volcanic vent microbial communities from Axial Seamount, northeast Pacific ocean - Sample FS917_Marker33_RNA CLC_assembly	Marine Biological Laboratory				Illumina NextSeq	1518	Marker33 Vent, Axial Seamount, northeast Pacific Ocean	Marker33 Vent, Axial Seamount, northeast Pacific Ocean	45.9332	-129.982	2015/8/26	1113561	2427	no
3300050925	Ga0504801	Sorted cell/s from hydrothermal vent fluid, Lost City Hydrothermal field, North Atlantic Ocean	Sorted cell/s from hydrothermal vent fluid, Lost City Hydrothermal field, North Atlantic Ocean - AH-954-J04	DOE Joint Genome Institute (JGI)		SAMN49208316	SRX29504537	Illumina NovaSeq S4		North Atlantic Ocean	hydrothermal vent fluid	30.1194	-42.1248	2018/9/21	804827	792	no
3300006087	Ga0081984	Diffuse hydrothermal flow volcanic vent microbial communities from Axial Seamount, northeast Pacific Ocean	Diffuse hydrothermal flow volcanic vent microbial communities from Axial Seamount, northeast Pacific ocean - Sample FS906_Marker113_RNA	Marine Biological Laboratory				Illumina HiSeq 1000	1521	North Pacific Ocean: Axial Seamount	Axial Seamount, northeast Pacific Ocean	45.9228	-129.988	2014/8/12	3730957	12752	no
3300023440	Ga0256750	Hydrothermal Fe-rich Mat Reference Genomes	Hydrothermal Fe-rich mat microbial community from Rainbow Site, Mid-Atlantic Ridge, Atlantic Ocean - 664-BS3	University of Delaware				Illumina HiSeq 2500	2294.78	International: Rainbow Site, Mid-Atlantic Ridge	Rainbow Site	36.2293	-33.9028	2012/10/19	281608188	421507	no
3300019446	Ga0193919	Microbial communities from sediments and microbial mats in various locations	Sorted cell/s from Southern Trench hydrothermal vent microbial mat, Guaymas Basin, Mexico - 6E_4862_10_21	DOE Joint Genome Institute (JGI)		SAMN08776956	SRX3974055	Illumina NextSeq-HO	1999	Mexico: Guaymas Basin	hydrothermal vent microbial mat 1 from Smoker "X", Site 6	27.001	-110.6	2016/12/13	8143910	9085	no
2616644894	Ga0072700	Hydrothermal vent microbial communities from Crab Spa hydrothermal vent, East Pacific Rise	Campylobacteriales bacterium SCGC AD-698-A20 (contamination screened)	Bigelow Laboratory Single Cell Genomics Center (SCGC)				Illumina		Pacific Ocean: East Pacific Rise, Crab Spa		9.83997	-104.294		662812	707	no
3300003528	Ga0060327	Diffuse hydrothermal flow volcanic vent microbial communities from Axial Seamount, northeast Pacific Ocean	Diffuse hydrothermal flow volcanic vent microbial communities from Axial Seamount, northeast Pacific ocean - Sample LVWS2_TP1_13H					Illumina	1542	North Pacific Ocean: Axial Seamount	Anemone diffuse flow vent, Axial seamount	45.9333	-130.014		3129687	8043	no
3300050920	Ga0504796	Sorted cell/s from hydrothermal vent fluid, Lost City Hydrothermal field, North Atlantic Ocean	Sorted cell/s from hydrothermal vent fluid, Lost City Hydrothermal field, North Atlantic Ocean - AH-954-G15	DOE Joint Genome Institute (JGI)		SAMN49215507	SRX29505458	Illumina NovaSeq S4		North Atlantic Ocean	hydrothermal vent fluid	30.1194	-42.1248	2018/9/21	2703548	2577	no
3300005756	Ga0078057	Microbial community analysis of hydrothermal vent diffuse flow samples from Mid-Cayman Rise, Pacific Ocean	Microbial community analysis of hydrothermal vent diffuse flow samples from Mid-Cayman Rise, Pacific Ocean - FS866	Marine Biological Laboratory					2293	Mid-Cayman Rise	Mid-Cayman Rise diffuse flow	18.37	-81.798	2013/6/21	10354860	15485	no
3300005749	Ga0077562	Microbial community analysis of hydrothermal vent diffuse flow samples from Mid-Cayman Rise, Pacific Ocean	Microbial community analysis of hydrothermal vent diffuse flow samples from Mid-Cayman Rise, Pacific Ocean - FS854	Marine Biological Laboratory				Illumina HiSeq		Mid-Cayman Rise	diffuse flow fluid, FS854, Piccard, Mid-Cayman Rise			2012	37557791	48430	no
3300007721	Ga0105675	Diffuse hydrothermal flow volcanic vent microbial communities from Axial Seamount, northeast Pacific Ocean	Diffuse hydrothermal flow volcanic vent microbial communities from Axial Seamount, northeast Pacific ocean - Sample FS915_Marker113_RNA CLC_assembly	Marine Biological Laboratory				Illumina NextSeq	1520	Marker113 Vent, Axial Seamount, northeast Pacific Ocean	Marker113 Vent, Axial Seamount, northeast Pacific Ocean	45.9228	-129.988	2015/8/25	157023	335	no
2836513220	Ga0400631	Hydrothermal Fe-rich Mat Reference Genomes	Unclassified Zetaproteobacteria bacterium 479-BS4_FULL_No.1_63.1_19	Western Washington University											731697	906	no
3300006613	Ga0101494	Diffuse hydrothermal flow volcanic vent microbial communities from Axial Seamount, northeast Pacific Ocean	Diffuse hydrothermal flow volcanic vent microbial communities from Axial Seamount, northeast Pacific ocean - Sample FS891_Anemone_DNA	The Marine Biological Laboratory				Illumina	1542	North Pacific Ocean: Axial Seamount	Anemone diffuse flow vent, Axial seamount	45.9332	-130.014		378883382	948037	no
3300001676	Ga0012486	Black smokers hydrothermal plume microbial communities from Tui Malila, Lau Basin, Pacific Ocean	Black smokers hydrothermal plume microbial communities from Tui Malila, Lau Basin, Pacific Ocean	University of Michigan				Illumina HiSeq 2000	2000	Tui Malila, Lau Basin, Pacific Ocean	Tui Malila, Lau Basin, Pacific Ocean	-21.99	-176.569		107945955	143298	no
3300022210	Ga0236250	Characterization of microbial community from Mariana Back Arc	Hydrothermal fluids microbial communities from Mariana Back-Arc Basin vent fields, Pacific Ocean - Hafa_FS927_RNA_SIP 150_kmer	Marine Biological Laboratory				Illumina NextSeq	3278	Hafa Adai vent field, Mariana back arc basin	Hafa Adai vent field	16.9618	144.869	2016/12/11	4349095	7460	no
3300013386	Ga0177920	Tubeworm-associated microbial communities from Endeavour hydrothermal vents, Juan de Fuca Ridge, Canada	Tubeworm-associated microbial communities from Endeavour hydrothermal vents, Juan de Fuca Ridge, Canada - low-flow bush	Genome Quebec				Illumina HiSeq	2180	Endeavour Segment, Juan de Fuca Ridge, Canada	Base of tubeworm bush	48.1778	-129.336	2008	134805401	357706	no
2728369428	Ga0180927	Deep subsurface and oceanic microbial communities from Witwatersrand Basin, South Africa, and the Canadian and Fennoscandian shields and at the Lost City Hydrothermal Field	Desulfarculaceae bacterium JdFR-95	DOE Joint Genome Institute (JGI)											2807742	2838	no
3300028422	Ga0304770	Black smoker hydrothermal vent sediment microbial communities from the Guaymas Basin, Mid-Atlantic Ridge, South Atlantic Ocean	Black smoker hydrothermal vent sediment microbial communities from the Guaymas Basin, Mid-Atlantic Ridge, South Atlantic Ocean - BSmoChi-MAR-TVG12 re-analysis	Beijing Genomics Institute (BGI)				Illumina HiSeq X Ten		Mid-Atlantic Ridge, South Atlantic Ocean	Mid-Atlantic Ridge, South Atlantic Ocean	-15.16	-13.35	2012/8	4930768612	7482251	no
3300001845	Ga0016845	Hydrothermal vent plume microbial communities from the Cayman Rise, Cayman Islands	Hydrothermal vent plume microbial communities from the Mid Cayman Rise - Shallow Sites - lt1kb	University of Michigan				Illumina HiSeq 2000	2000	Mid Cayman Rise, Cayman Islands, UK	Mid Cayman Rise, multiple shallow sites combined	18.35	-81.85		117675588	292618	no
3300006076	Ga0081592	Microbial communities in diffuse hydrothermal fluids of Manus Basin, Bismarck Sea	Microbial communities in diffuse hydrothermal fluids of Manus Basin, Bismarck Sea - fluid A	Max Planck Institute for Plant Breeding Research						Manus Basin, Bismarck Sea	diffuse hydrothermal fluid	-3.79992	152.101		448592571	663533	yes
3300042739	Ga0454352	Microbial symbiotic communities from bathmodiolin mussel gills	Mollusc gills microbial communities from Lilliput hydrothermal vent, Atlantic Ocean - BspSym_Li_4_5-1 Re-assembly	Max Planck Institute for Marine Microbiology		SAMEA5664328	ERX3367177	Illumina HiSeq 2500	1494	South Atlantic Ocean	mollusc gills	-9.54817	-13.2088	2009/4/29	156934058	155190	no
3300050936	Ga0504814	Sorted cell/s from hydrothermal vent fluid, Lost City Hydrothermal field, North Atlantic Ocean	Sorted cell/s from hydrothermal vent fluid, Lost City Hydrothermal field, North Atlantic Ocean - AH-956-B05	DOE Joint Genome Institute (JGI)		SAMN49218541	SRX29504548	Illumina NovaSeq S4		North Atlantic Ocean	hydrothermal vent fluid	30.1197	-42.1244	2018/9/21	1656189	1531	no
3300003950	Ga0064032	Diffuse hydrothermal flow volcanic vent microbial communities from Axial Seamount, northeast Pacific Ocean	Diffuse hydrothermal flow volcanic vent microbial communities from Axial Seamount, northeast Pacific ocean - Sample FS907_80_13H6	Marine Biological Laboratory				Illumina HiSeq 1000	1542	Northeast Pacific Ocean: Anemone vent, Axial Seamount	Anemone diffuse flow vent, Axial seamount	45.933	-130.014		1191941	3098	no
3300001840	Ga0016884	Hydrothermal vent plume microbial communities from the Cayman Rise, Cayman Islands	Hydrothermal vent plume microbial communities from the Mid Cayman Rise - Shallow Sites - gte1kb - lt4kb	University of Michigan				Illumina HiSeq 2000	2000	Mid Cayman Rise, Cayman Islands	Mid Cayman Rise, multiple shallow sites combined	18.35	-81.85		146151029	204287	no
3300022470	Ga0190367	Microbial communities from sediments and microbial mats in various locations	Hydrothermal vent microbial mat bacterial communities from Southern Trench, Guaymas Basin, Mexico - 4872-18-10-11_MG	DOE Joint Genome Institute (JGI)		SAMN08779110	SRX3982358	Illumina HiSeq 2500-1TB	2011	Mexico: Guaymas Basin	Cathedral Hill gradient site, white microbial mat	27.0114	-110.596	2016/12/24	345302164	693567	yes
3300003837	Ga0062498	Diffuse hydrothermal flow volcanic vent microbial communities from Axial Seamount, northeast Pacific Ocean	Diffuse hydrothermal flow volcanic vent microbial communities from Axial Seamount, northeast Pacific ocean - Sample FS904_30_12L	Marine Biological Laboratory				Illumina HiSeq 1000	1516	Marker 33 diffuse flow vent, Axial Seamount	Marker 33 diffuse flow vent, Axial Seamount	45.9332	-129.982		3725126	8792	no
3300015247	Ga0183265	Seawater microbial communities from hydrothermal vent in East China Sea, Taiwan, China	Seawater microbial communities from hydrothermal vent in East China Sea, Taiwan, China - gui-2014 bottom metaG	Shanghai Hanyu Bio-Tech Co., Ltd				Illumina MiSeq, Illumina HiSeq		taiwan province,china	bottom of the hydrothermal vent	25	128		84132390	310055	no
3300032176	Ga0326351	Microbial communities from the deep biosphere	Hydrothermal vent fluid microbial communities from Atlantic Lost City Hydrothermal Field, Atlantic Ocean - LC_HO8_2_2 re-assembly	Marine Biological Laboratory		SAMN03154335	SRX748863	Illumina HiSeq 1000	766.7	Atlantic Ocean: Lost City Hydrothermal Field	Hydrothermal vent fluid	30.1241	-42.1201	2005/8/1	255018991	622963	no
3300042038	Ga0451326	Mollusc gills microbial communities from various hydrothermal vent in Atlantic Ocean	Mollusc gills microbial communities from Lucky Strike-Montsegur hydrothermal vent, Atlantic Ocean - BazoSym_LS-MS_2_1048G	Max Planck Institute for Marine Microbiology		SAMEA5664343	ERX3367192	Illumina HiSeq 2500	1700	North Atlantic Ocean	mollusc gills	37.2881	-32.2756	2013/8/9	6521528	9361	no
3300055445	Ga0567547	Hydrothermal vents viral and microbial communities from various locations in Pacific Ocean	Metatranscriptome of hydrothermal vent plume microbial communities from Gulf of California, Mexico - CTD-FK190211-025-400m-0.65 (Metagenome Metatranscriptome) (v2) (version 2)	DOE Joint Genome Institute (JGI)		SAMN52640849	SRX30974612, SRX30974613	Illumina NovaSeq S4	400	Mexico: Gulf of California	Pelagic ocean, hydrothermal vent plume	23.9566	-108.862	2019/3/9	254297301	410452	yes
3300052656	Ga0496651	Hydrothermal vents viral and microbial communities from various locations in Pacific Ocean	Hydrothermal vent plume microbial communities from Gulf of California, Mexico - CTD-FK190211-01-585m-0.1	DOE Joint Genome Institute (JGI)		SAMN51146548	SRX30619130	Illumina NovaSeq S4	585	Mexico: Gulf of California	Pelagic ocean, hydrothermal vent plume	27.0013	-111.412	2019/2/26	1637428	3208	no
2734482391	Ga0180915	Deep subsurface and oceanic microbial communities from Witwatersrand Basin, South Africa, and the Canadian and Fennoscandian shields and at the Lost City Hydrothermal Field	Candidatus Acetothermia bacterium JdFR-51	DOE Joint Genome Institute (JGI)											1763844	1927	no
3300003513	Ga0060294	Diffuse hydrothermal flow volcanic vent microbial communities from Axial Seamount, northeast Pacific Ocean	Diffuse hydrothermal flow volcanic vent microbial communities from Axial Seamount, northeast Pacific ocean - Sample FS828_N3Area_DNA					Illumina	1524	North Pacific Ocean: Axial Seamount	N3 Area diffuse flow vent, Axial seamount	45.944	-129.985	2011/1/1	60945433	135876	no
2836488845	Ga0400612	Hydrothermal Fe-rich Mat Reference Genomes	Unclassified Zetaproteobacteria bacterium S7_FULL_No.2_6.6_26	University of Delaware											435308	501	no
3300050931	Ga0504807	Sorted cell/s from hydrothermal vent fluid, Lost City Hydrothermal field, North Atlantic Ocean	Sorted cell/s from hydrothermal vent fluid, Lost City Hydrothermal field, North Atlantic Ocean - AH-954-L22	DOE Joint Genome Institute (JGI)		SAMN49211299	SRX29504541	Illumina NovaSeq S4		North Atlantic Ocean	hydrothermal vent fluid	30.1194	-42.1248	2018/9/21	858667	925	no
2836445533	Ga0400572	Hydrothermal Fe-rich Mat Reference Genomes	Unclassified Zetaproteobacteria bacterium 664-SC8_FULL_No.3_2.0_74	University of Delaware											1492163	1609	no
3300007730	Ga0105669	Diffuse hydrothermal flow volcanic vent microbial communities from Axial Seamount, northeast Pacific Ocean	Diffuse hydrothermal flow volcanic vent microbial communities from Axial Seamount, northeast Pacific ocean - Sample CTDPlume_2015_RNA CLC_assembly	Marine Biological Laboratory				Illumina NextSeq	1500	Axial Seamount, northeast Pacific Ocean	Axial Seamount, northeast Pacific Ocean	45.9372	-130.082	2015/8/19	9055717	15917	yes
2893484187	Ga0454289	Hydrothermal Fe-rich Mat Reference Genomes	Unclassified Actinobacteria bacterium S19_FULL_No.1_2.5_94	University of Delaware											2046165	1986	no
3300022697	Ga0248672	Deep Sea Chimney Vent Samples 2015 - Flores Lab	Hydrothermal vent microbial communities from dead black smoker in Mariner Vent Field, Eastern Lau Spreading Center, Pacific Ocean - O	University of California, Irvine				Illumina HiSeq 2500	1920	Mariner Vent Field, Eastern Lau Spreading Center, Pacific Ocean	hydrothermal vent	22.1802	176.601	2015/5/8	169004004	185880	no
3300021508	Ga0190283	Microbial communities from sediments and microbial mats in various locations	Hydrothermal vent microbial mat bacterial communities from Southern Trench, Guaymas Basin, Mexico - 4869-18-0-1_MG	DOE Joint Genome Institute (JGI)		SAMN08779062	SRX3982073	Illumina HiSeq 2500-1TB	2001	Mexico: Guaymas Basin	Ultra Mound gradient site, orange microbial mat	27.0074	-110.591	2016/12/21	242313859	494266	yes
3300050952	Ga0504831	Sorted cell/s from hydrothermal vent fluid, Lost City Hydrothermal field, North Atlantic Ocean	Sorted cell/s from hydrothermal vent fluid, Lost City Hydrothermal field, North Atlantic Ocean - AH-956-M05	DOE Joint Genome Institute (JGI)		SAMN49208276	SRX29496325	Illumina NovaSeq S4		North Atlantic Ocean	hydrothermal vent fluid	30.1197	-42.1244	2018/9/21	539345	651	no
3300050008	Ga0496602	Hydrothermal vents viral and microbial communities from various locations in Pacific Ocean	Hydrothermal vent plume viral communities from North Pacific Ocean - CTD-AT42-06-010-45m-0.03 v	DOE Joint Genome Institute (JGI)		SAMN51146415	SRX30589647	Illumina NovaSeq S4	2476	North Pacific Ocean	Pelagic ocean, hydrothermal vent plume	9.84014	-104.292	2018/12/13	48642448	140901	no
3300001707	Ga0012958	Hydrothermal vent plume microbial communities from the Cayman Rise, Cayman Islands	Hydrothermal vent plume microbial communities from the Mid Cayman Rise - Beebe Supr50	University of Michigan				Illumina HiSeq 2000	4000	Beebe Vents, Mid Cayman Rise	Beebe Vents, Mid Cayman Rise	18.35	-81.85		24423628	39518	no
2236347000	Ga0011250	Hydrothermal vent microbial communities from Guaymas and Carmen Basins, Gulf of California	Hydrothermal vent plume microbial communities from the Guaymas Basin, Gulf of California - transcript assembly	Pennsylvania State University				Illumina HiSeq 2000	1996	Guaymas Basin, Gulf of California	Guaymas Basin, Gulf of California	27.823	-111.4	2008/7/1	21125931	81452	no
3300041398	Ga0453484	Diffuse flow microbial communities from hydrothermal vent near Loihi Seamount, Hawaii, USA	Diffuse flow microbial community from hydrothermal vent near Loihi Seamount, Hawaii, USA - MH5513C5	Marine Biological Laboratory				Illumina NextSeq 500		USA: Kilauea Volcano, Hawaii	Diffuse flow from hydrothermal vent at Kilauea Volcano, Hawaii	19.42	-155.28	2018/8/28	1787356	2925	no
2836533920	Ga0400647	Hydrothermal Fe-rich Mat Reference Genomes	Unclassified Zetaproteobacteria bacterium 481-BS4_FULL_No.3_2.4_84	Western Washington University											2092294	2091	no
3300002609	Ga0041846	Diffuse hydrothermal flow volcanic vent microbial communities from Axial Seamount, northeast Pacific Ocean	Diffuse hydrothermal flow volcanic vent microbial communities from Axial Seamount, northeast Pacific ocean - Sample FS903_30_13L						1522	Marker 113, Axial Seamount, Northeast Pacific Ocean	Marker 113 diffuse flow, Axial Seamount	45.9227	-129.988		365165	1182	no
3300022234	Ga0236248	Characterization of microbial community from Mariana Back Arc	Hydrothermal fluids microbial communities from Mariana Back-Arc Basin vent fields, Pacific Ocean - Hafa_FS927_RNA_SIP_18hr_80 150_kmer	Marine Biological Laboratory				Illumina NextSeq	3278	Hafa Adai vent field, Mariana back arc basin	Hafa Adai vent field	16.9618	144.869	2016/12/11	1860790	2531	no
3300066761	Ga0496659	Hydrothermal vents viral and microbial communities from various locations in Pacific Ocean	Hydrothermal vent plume microbial communities from Gulf of California, Mexico - CTD-FK190211-18-72m-0.65	DOE Joint Genome Institute (JGI)				Illumina NovaSeq S4	72	Mexico: Gulf of California	Pelagic ocean, hydrothermal vent plume	27.0107	-111.407	2019/3/6	22224123	43233	no
2630968210	Ga0078068	Single Amplified Genomes from Iheya North hydrothermal field in the Okinawa Trough	Anaerolineales sp. SCGS AC-711-J10 (contamination screened)	Bigelow Laboratory Single Cell Genomics Center (SCGC)				Illumina		Pacific Ocean	Okinawa Trough				1010824	988	no
3300021498	Ga0190309	Microbial communities from sediments and microbial mats in various locations	Hydrothermal vent sediment bacterial communities from Southern Trench, Guaymas Basin, Mexico - 4870-07-6-7_MG	DOE Joint Genome Institute (JGI)		SAMN08777550	SRX3982110	Illumina HiSeq 2500-1TB	1999	Mexico: Guaymas Basin	Cathedral Hill gradient site area, sediment	27.0114	-110.593	2016/12/22	157464716	339111	yes
3300006083	Ga0081762	Diffuse hydrothermal flow volcanic vent microbial communities from Axial Seamount, northeast Pacific Ocean	Diffuse hydrothermal flow volcanic vent microbial communities from Axial Seamount, northeast Pacific ocean - Sample FS908_Marker33_DNA	Marine Biological Laboratory				Illumina HiSeq 1000	1516	North Pacific Ocean: Axial Seamount	Marker 33 diffuse flow vent, Axial Seamount	45.9332	-129.982	2014/8	235585392	563401	yes
3300021980	Ga0232637	Characterization of microbial community from Mariana Back Arc	Hydrothermal fluids microbial communities from Mariana Back-Arc Basin vent fields, Pacific Ocean - Burke_FS924 _150kmer	Marine Biological Laboratory				Illumina NextSeq	3630	Burke vent field, Mariana back arc basin	Burke vent field	18.1826	144.72	2016/12/7	974958885	1881906	yes
2616644892	Ga0072698	Hydrothermal vent microbial communities from Crab Spa hydrothermal vent, East Pacific Rise	Sulfurimonas sp. SCGC AD-690-P11 (contamination screened)	Bigelow Laboratory Single Cell Genomics Center (SCGC)				Illumina		Pacific Ocean: East Pacific Rise, Crab Spa		9.83997	-104.294		570211	580	no
3300010900	Ga0137513	Diffuse hydrothermal flow volcanic vent microbial communities from Axial Seamount, northeast Pacific Ocean	Diffuse hydrothermal flow volcanic vent microbial communities from Axial Seamount, northeast Pacific ocean - Sample LVWS5_55_TP1_12L	Marine Biological Laboratory				Illumina HiSeq 1000	1542	Northeast Pacific Ocean: Anemone vent, Axial Seamount	Anemone diffuse flow vent, Axial Seamount	45.933	-130.014	2014/8	1044620	2400	no
3300039261	Ga0438743	Tubeworm-associated microbial communities from Endeavour hydrothermal vents, Juan de Fuca Ridge, Canada	Tubeworm-associated microbial communities from Endeavour hydrothermal vents, Juan de Fuca Ridge, Canada - diffuse fluids ECf11	Dalhousie University				Illumina NextSeq 550	2180	Juan de Fuca Ridge, NE Pacific	Fluids venting through tubeworm assemblage	47.9631	-129.092	2016/8	560534790	1286088	no
2728369417	Ga0180895	Deep subsurface and oceanic microbial communities from Witwatersrand Basin, South Africa, and the Canadian and Fennoscandian shields and at the Lost City Hydrothermal Field	Nitrospirae bacterium JdFR-83	DOE Joint Genome Institute (JGI)											1165085	1303	no
2616644860	Ga0072652	Hydrothermal vent microbial communities from Crab Spa hydrothermal vent, East Pacific Rise	Sulfurovum sp. SCGC AAA036-N17 (contamination screened)	Bigelow Laboratory Single Cell Genomics Center (SCGC)				Illumina		Pacific Ocean: East Pacific Rise, Crab Spa		9.83997	-104.294		469609	488	no
2836439678	Ga0400569	Hydrothermal Fe-rich Mat Reference Genomes	Unclassified Zetaproteobacteria bacterium 664-BS3_FULL_No.8_0.4_73	University of Delaware											1318227	1648	no
3300048879	Ga0496648	Hydrothermal vents viral and microbial communities from various locations in Pacific Ocean	Hydrothermal vent plume microbial communities from North Pacific Ocean - CTD-AT42-06-007-2500m-0.1	DOE Joint Genome Institute (JGI)		SAMN51146290	SRX30607201	Illumina NovaSeq S4	2500	North Pacific Ocean	Pelagic ocean, hydrothermal vent plume	9.83807	-104.291	2018/12/12	186200456	344563	yes
3300039235	Ga0438691	Tubeworm-associated microbial communities from Endeavour hydrothermal vents, Juan de Fuca Ridge, Canada	Tubeworm-associated microbial communities from Endeavour hydrothermal vents, Juan de Fuca Ridge, Canada - low-flow bush EMw5	Dalhousie University				Illumina NextSeq 550	2197	Juan de Fuca Ridge, NE Pacific, Canada	Base of tubeworm bush	47.95	-129.097	2016/8	495449637	973050	no
3300010417	Ga0137505	Diffuse hydrothermal flow volcanic vent microbial communities from Axial Seamount, northeast Pacific Ocean	Diffuse hydrothermal flow volcanic vent microbial communities from Axial Seamount, northeast Pacific ocean - Sample LVWS4_55_TP2_12L	Marine Biological Laboratory				Illumina HiSeq 1000	1522	Marker 113, Axial Seamount, Northeast Pacific Ocean	Marker 113 diffuse flow vent, Axial Seamount	45.9227	-129.988	2014/8	855431	1925	no
2616644865	Ga0072657	Hydrothermal vent microbial communities from Crab Spa hydrothermal vent, East Pacific Rise	Spirochaetes sp. SCGC AC-213-D02 (unscreened)	Bigelow Laboratory Single Cell Genomics Center (SCGC)				Illumina		Pacific Ocean: East Pacific Rise, Crab Spa		9.83997	-104.294		975315	934	no
2772190965	Ga0261637	Hydrothermal Fe-rich Mat Reference Genomes	Unclassified Zetaproteobacteria bacterium S1_FULL_No.8_0.5_75	University of Delaware											1567655	1790	no
2616644913	Ga0072719	Hydrothermal vent microbial communities from Crab Spa hydrothermal vent, East Pacific Rise	Sulfurovum sp. SCGC AD-706-L15 (contamination screened)	Bigelow Laboratory Single Cell Genomics Center (SCGC)				Illumina		Pacific Ocean: East Pacific Rise, Crab Spa		9.83997	-104.294		366457	399	no
3300001683	Ga0012985	Hydrothermal vent plume microbial communities from Guaymas Basin, Pacific Ocean	Hydrothermal vent plume microbial communities from Guaymas Basin, Gulf of California - IDBA assembly	University of Michigan				Illumina HiSeq 2000	1993	Guyams Basin, Gulf of California, Pacific Ocean	Guyams Basin, Gulf of California, Pacific Ocean	27.0158	-111.425	2004/7/11	572189614	955942	no
3300005791	Ga0079402	Diffuse hydrothermal flow volcanic vent microbial communities from Axial Seamount, northeast Pacific Ocean	Diffuse hydrothermal flow volcanic vent microbial communities from Axial Seamount, northeast Pacific ocean - Sample FS907_Anemone_DNA	Marine Biological Laboratory				Illumina HiSeq 1000	1542	North Pacific Ocean: Axial Seamount	Anemone diffuse flow vent, Axial seamount	45.9332	-130.014	2014/8	13538074	19582	no
2772190960	Ga0261630	Hydrothermal Fe-rich Mat Reference Genomes	Unclassified Zetaproteobacteria bacterium S1_FULL_No.1_79.4_95	University of Delaware											1969072	2169	no
3300049254	Ga0438784	Tubeworm-associated microbial communities from Endeavour hydrothermal vents, Juan de Fuca Ridge, Canada	Tubeworm-associated microbial communities from Endeavour hydrothermal vents, Juan de Fuca Ridge, Canada - low-flow bush EMw3	Dalhousie University				Illumina NextSeq 550	2195	Juan de Fuca Ridge, NE Pacific	Base of tubeworm bush	47.95	-129.097	2016/8	775085911	1630690	no
2836402399	Ga0400541	Hydrothermal Fe-rich Mat Reference Genomes	Unclassified Zetaproteobacteria bacterium S19_FULL_No.7_0.9_77	University of Delaware											2066774	2417	no
3300009383	Ga0118757	Microbial community analysis of hydrothermal vent diffuse flow samples from Mid-Cayman Rise, Pacific Ocean	Microbial community analysis of hydrothermal vent diffuse flow samples from Mid-Cayman Rise, Pacific Ocean - FS879 no minimum length	Marine Biological Laboratory				Illumina HiSeq		Mid Cayman Rise	Hot Cracks #2, Von Damm, Mid Cayman Rise	18.375	-81.797	2013/6/27	68927963	275874	no
3300001780	Ga0013013	Hydrothermal vent plume microbial communities from the Cayman Rise, Cayman Islands	Hydrothermal vent plume microbial communities from the Mid Cayman Rise - Vondamm Supr46	University of Michigan				Illumina HiSeq 2000	2000	Vondamm Vents, Mid Cayman Rise	Vondamm Vents, Mid Cayman Rise	18.35	-81.85		179566894	265480	no
3300014504	Ga0134509	Deep-sea hydrothermal vent sediment bacterial and viral communities from Southwest Indian Ocean	Deep-sea hydrothermal vent sediment bacterial and viral communities from Southwest Indian Ocean - SWIR-S021-M	Zhejiang University		SAMN04447815	SRX1552774	Illumina HiSeq 2000		Indian Ocean	deep-sea hydrothermal vent sediment	-37.88	49.66		3907367	8920	no
2616644912	Ga0072718	Hydrothermal vent microbial communities from Crab Spa hydrothermal vent, East Pacific Rise	Nautilia sp. SCGC AD-702-P16 (contamination screened)	Bigelow Laboratory Single Cell Genomics Center (SCGC)				Illumina		Pacific Ocean: East Pacific Rise, Crab Spa		9.83997	-104.294		1229711	1406	no
3300003514	Ga0060292	Diffuse hydrothermal flow volcanic vent microbial communities from Axial Seamount, northeast Pacific Ocean	Diffuse hydrothermal flow volcanic vent microbial communities from Axial Seamount, northeast Pacific ocean - Sample FS821_Marshmallow_DNA					Illumina	1544	North Pacific Ocean: Axial Seamount	Marshmallow diffuse flow, Axial seamount	45.934	-130.013	2011/1/1	75613494	163260	no
3300010414	Ga0137494	Diffuse hydrothermal flow volcanic vent microbial communities from Axial Seamount, northeast Pacific Ocean	Diffuse hydrothermal flow volcanic vent microbial communities from Axial Seamount, northeast Pacific ocean - Sample FS906_80_TP1_12L	Marine Biological Laboratory				Illumina HiSeq 1000	1522	Marker 113, Axial Seamount, Northeast Pacific Ocean	Marker 113 diffuse flow vent, Axial Seamount	45.9227	-129.988	2014/8	3323211	7981	no
3300005099	Ga0072682	Hydrothermal sediment in Guaymas	Hydrothermal sediment microbial communities from the Guaymas Basin, Gulf of California, Pacific Ocean - 10, 8-11cmbsf	Beijing Genomics Institute (BGI)						Guaymas Basin	Guaymas Basin				234918618	276075	yes
2616644857	Ga0071362	Hydrothermal vent microbial communities from Crab Spa hydrothermal vent, East Pacific Rise	Sulfurovum sp. SCGC AAA036-I20 (contamination screened)	Bigelow Laboratory Single Cell Genomics Center (SCGC)				Illumina HiSeq		Pacific Ocean: East Pacific Rise, Crab Spa		9.83997	-104.294		1022980	1099	no
3300025156	Ga0209834	Bacterial and archaeal communities from various locations to study Microbial Dark Matter (Phase II)	Marine hydrothermal vent microbial communities from Guaymas Basin, Gulf of California to study Microbial Dark Matter (Phase II) - Marker 14 Mat core 4569-2 3-6 cm metaG (SPAdes) (version 4)	DOE Joint Genome Institute (JGI)		SAMN06264663	SRX2525187	Illumina HiSeq 2500-1TB	2000	Mexico: Guaymas Basin, Gulf of California	marine hydrothermal sediment	27.0078	-111.407	2009/11/30	944352716	2329548	yes
3300050006	Ga0496599	Hydrothermal vents viral and microbial communities from various locations in Pacific Ocean	Hydrothermal vent plume viral communities from North Pacific Ocean - CTD-AT42-06-005-500m-0.03 v	DOE Joint Genome Institute (JGI)		SAMN51146976	SRX30592169	Illumina NovaSeq S4	500	North Pacific Ocean	Pelagic ocean, hydrothermal vent plume	8.41285	-104.419	2018/12/6	336747254	818785	no
3300006082	Ga0081761	Diffuse hydrothermal flow volcanic vent microbial communities from Axial Seamount, northeast Pacific Ocean	Diffuse hydrothermal flow volcanic vent microbial communities from Axial Seamount, northeast Pacific ocean - Sample FS907_Anemone_DNA	Marine Biological Laboratory				Illumina HiSeq 1000	1542	North Pacific Ocean: Axial Seamount	Anemone diffuse flow vent, Axial seamount	45.9332	-130.014	2014/8	343028848	898291	yes
3300041958	Ga0456191	Diffuse hydrothermal flow volcanic vent microbial communities from Axial Seamount, northeast Pacific Ocean	Diffuse hydrothermal flow volcanic vent microbial communities from Axial Seamount, northeast Pacific ocean - Sample FS908_Marker33_DNA SE_2020	Marine Biological Laboratory				Illumina HiSeq 1000	1516	North Pacific Ocean: Axial Seamount	Marker 33 diffuse flow vent, Axial Seamount	45.9332	-129.982	2014/8	247392160	510686	yes
2728369414	Ga0180917	Deep subsurface and oceanic microbial communities from Witwatersrand Basin, South Africa, and the Canadian and Fennoscandian shields and at the Lost City Hydrothermal Field	Candidatus Aminicenantes bacterium JdFR-80	DOE Joint Genome Institute (JGI)											2914703	2587	no
3300021506	Ga0190358	Microbial communities from sediments and microbial mats in various locations	Hydrothermal vent microbial mat bacterial communities from Southern Trench, Guaymas Basin, Mexico - 4872-18-1-2_MG	DOE Joint Genome Institute (JGI)		SAMN08779266	SRX3982320	Illumina HiSeq 2500-1TB	2011	Mexico: Guaymas Basin	Cathedral Hill gradient site, white microbial mat	27.0114	-110.596	2016/12/24	237083223	525249	no
2616644921	Ga0072831	Hydrothermal vent microbial communities from Crab Spa hydrothermal vent, East Pacific Rise	Sulfurovum sp. SCGC AD-726-K20 (contamination screened)	Bigelow Laboratory Single Cell Genomics Center (SCGC)				Illumina		Pacific Ocean: East Pacific Rise, Crab Spa		9.83997	-104.294		1064619	1132	no
3300021496	Ga0190343	Microbial communities from sediments and microbial mats in various locations	Hydrothermal vent microbial mat bacterial communities from Southern Trench, Guaymas Basin, Mexico - 4872-13-1-2_MG	DOE Joint Genome Institute (JGI)		SAMN08779103	SRX3982297	Illumina HiSeq 2500-1TB	2011	Mexico: Guaymas Basin	Cathedral Hill gradient site, white microbial mat	27.0114	-110.596	2016/12/24	136289761	306073	no
2836508227	Ga0400628	Hydrothermal Fe-rich Mat Reference Genomes	Unclassified Zetaproteobacteria bacterium 479-BS3_FULL_No.2_3.9_94	Oregon Health and Science University (OHSU)											2304919	2485	no
3300050953	Ga0504832	Sorted cell/s from hydrothermal vent fluid, Lost City Hydrothermal field, North Atlantic Ocean	Sorted cell/s from hydrothermal vent fluid, Lost City Hydrothermal field, North Atlantic Ocean - AH-956-M16	DOE Joint Genome Institute (JGI)		SAMN49208274	SRX29496305	Illumina NovaSeq S4		North Atlantic Ocean	hydrothermal vent fluid	30.1197	-42.1244	2018/9/21	1290214	1378	no
2531839442	Ga0014761	Desulfotomaculum hydrothermale Lam5 = DSM 18033	Desulforamulus hydrothermalis Lam5	CEA Genoscope		SAMEA2272113				North East Tunisia	Terrestrial hot spring				2695031	2749	no
3300002765	Ga0047371	Diffuse hydrothermal flow volcanic vent microbial communities from Axial Seamount, northeast Pacific Ocean	Diffuse hydrothermal flow volcanic vent microbial communities from Axial Seamount, northeast Pacific ocean - Sample LVWS1_TP1_12H					Illumina	1522	Marker 113, Axial Seamount, Northeast Pacific Ocean	Marker 113 diffuse flow vent, Axial Seamount	45.9227	-129.988		768993	2557	no
3300045839	Ga0495863	Deep sea sediment microbial communities from hydrothermal vent field on the Central Indian Ridge, Indian Ocean	Deep sea sediment microbial communities from hydrothermal vent field on the Central Indian Ridge, Indian Ocean - GTV1904	Chunlab				Illumina MiSeq	0.1	Indian Ocean: Central Indian Ridge	Deep sea Hydrothermal vent sediment	11.2489	66.2542	2019/6/28	103841596	136644	no
3300003086	Ga0052187	Hydrothermal vent plume microbial communities from Guaymas Basin, Pacific Ocean	Marine viral communities from deep ocean hydrothermal plumes from the Lau and Guaymas Basin	University of Michigan						Lau and Guaymas Basin	Hydrothermal vent plume	-20.0532	-176.134	2009/1/1	2311950	3204	no
3300050001	Ga0496617	Hydrothermal vents viral and microbial communities from various locations in Pacific Ocean	Hydrothermal vent plume viral communities from North Pacific Ocean - CTD-AT42-06-003-550m-0.03-B v	DOE Joint Genome Institute (JGI)		SAMN51146638	SRX30593894	Illumina NovaSeq S4	550	North Pacific Ocean	Pelagic ocean, hydrothermal vent plume	8.39977	-104.981	2018/12/6	54698227	156449	no
3300019128	Ga0192468	Microbial communities from hydrothermal vent in East Pacific Rise, Pacific Ocean	Fluid microbial communities from hydrothermal vent in East Pacific Rise, Pacific Ocean - LVP2	Bigelow Laboratory for Ocean Sciences				Illumina	2500	East Pacific Rise, Pacific Ocean	Hydrothermal vent fluid	9.84	-104.29	2014/1/5	54210	152	no
3300021491	Ga0190332	Microbial communities from sediments and microbial mats in various locations	Hydrothermal vent sediment bacterial communities from Southern Trench, Guaymas Basin, Mexico - 4872-04-5-6_MG	DOE Joint Genome Institute (JGI)		SAMN08779460	SRX30216339	Illumina HiSeq 2500-1TB	2011	Mexico: Guaymas Basin	Cathedral Hill gradient site, bare sediment just outside mat	27.0114	-110.596	2016/12/24	131033271	278801	yes
3300026531	Ga0256835	Marine microbial communities from hydrothermal vents in the Atlantic and Pacific Ocean	Hydrothermal vent microbial communities from East Pacific Rise, Pacific Ocean - PIR-30	DOE Joint Genome Institute (JGI)		SAMN09094696	SRX4801600	Illumina HiSeq 2500-1TB	2513	Pacific Ocean: East Pacific Rise	Hydrothermal sulfide rock	9.775	-104.28	2004/3/20	565819585	1094647	yes
2616644893	Ga0072699	Hydrothermal vent microbial communities from Crab Spa hydrothermal vent, East Pacific Rise	Epsilonproteobacteria SCGC AD-698-A03 (contamination screened)	Bigelow Laboratory Single Cell Genomics Center (SCGC)				Illumina		Pacific Ocean: East Pacific Rise, Crab Spa		9.83997	-104.294		378843	430	no
3300042031	Ga0451319	Mollusc gills microbial communities from various hydrothermal vent in Atlantic Ocean	Mollusc gills microbial communities from Clueless hydrothermal vent, Atlantic Ocean - BspSym_Cl_1_11-2	Max Planck Institute for Marine Microbiology		SAMEA5664336	ERX3367185	Illumina HiSeq 2500	2972	South Atlantic Ocean	mollusc gills	-4.80327	-12.3718	2009/4/22	280092846	322605	no
3300006078	Ga0081595	Microbial communities in diffuse hydrothermal fluids of Manus Basin, Bismarck Sea	Microbial communities in diffuse hydrothermal fluids of Manus Basin, Bismarck Sea - fluid C	Max Planck Institute for Plant Breeding Research						Manus Basin, Bismarck Sea	diffuse hydrothermal fluids	-3.72833	151.672		352320966	649200	no
2728369426	Ga0180925	Deep subsurface and oceanic microbial communities from Witwatersrand Basin, South Africa, and the Canadian and Fennoscandian shields and at the Lost City Hydrothermal Field	Chloroflexi bacterium JdFR-59	DOE Joint Genome Institute (JGI)											2039159	2180	no
3300020236	Ga0212232	Black smoker hydrothermal vent sediment microbial communities from the Guaymas Basin, Mid-Atlantic Ridge, South Atlantic Ocean	Black smoker hydrothermal vent sediment microbial communities from the Guaymas Basin, Mid-Atlantic Ridge, South Atlantic Ocean - Sample 1 (For TVG13) Archaea reference mapping and reassemble	Beijing Genomics Institute (BGI)				Illumina HiSeq 2500	2770	Mid-Atlantic Ridge, South Atlantic Ocean	Mid-Atlantic Ridge, South Atlantic Ocean	-15.16	-13.35	2012/8	85671503	160516	no
3300008788	Ga0103688	Microbial communities of hydrothermal vent plumes from the Guaymas Basin in the Gulf of California	Microbial communities of hydrothermal vent plumes from the Guaymas Basin in the Gulf of California - Plume GD6i	University of Michigan		SAMN00847551	SRX134768	Illumina HiSeq 2000		Guaymas Basin in the Gulf of California	Hydrothermal vent in Guaymas Basin in the Gulf of California				71798817	238534	no
3300010435	Ga0137517	Diffuse hydrothermal flow volcanic vent microbial communities from Axial Seamount, northeast Pacific Ocean	Diffuse hydrothermal flow volcanic vent microbial communities from Axial Seamount, northeast Pacific ocean - Sample LVWS5_55_TP2_12L	Marine Biological Laboratory				Illumina HiSeq 1000	1542	Northeast Pacific Ocean: Anemone vent, Axial Seamount	Anemone diffuse flow vent, Axial Seamount	45.933	-130.014	2014/8	605722	1646	no
3300014848	Ga0182794	Microbial community analysis of hydrothermal vent diffuse flow samples from Mid-Cayman Rise, Pacific Ocean	Microbial community analysis of hydrothermal vent diffuse flow samples from Mid-Cayman Rise, Pacific Ocean - FS881 IDBA reassembly (rename)	Marine Biological Laboratory				Illumina HiSeq	2370	Mid Cayman Rise	Old Man Tree, Von Damm, Mid Cayman Rise	18.375	-81.797	2013/6/27	65792702	82323	yes
3300050938	Ga0504816	Sorted cell/s from hydrothermal vent fluid, Lost City Hydrothermal field, North Atlantic Ocean	Sorted cell/s from hydrothermal vent fluid, Lost City Hydrothermal field, North Atlantic Ocean - AH-956-D23	DOE Joint Genome Institute (JGI)		SAMN49211309	SRX29504538	Illumina NovaSeq S4		North Atlantic Ocean	hydrothermal vent fluid	30.1197	-42.1244	2018/9/21	1969890	1927	no
2836467541	Ga0400593	Hydrothermal Fe-rich Mat Reference Genomes	Unclassified Zetaproteobacteria bacterium 667-BS4_FULL_No.4_4.4_58	University of Delaware											1248580	1343	no
3300003530	Ga0060334	Diffuse hydrothermal flow volcanic vent microbial communities from Axial Seamount, northeast Pacific Ocean	Diffuse hydrothermal flow volcanic vent microbial communities from Axial Seamount, northeast Pacific ocean - Sample FS891_Anemone_RNA	The Marine Biological Laboratory				Illumina	1542	North Pacific Ocean: Axial Seamount	Anemone diffuse flow vent, Axial seamount	45.9332	-130.014		3434303	12377	no
3300015176	Ga0183263	Seawater microbial communities from hydrothermal vent in East China Sea, Taiwan, China	Seawater microbial communities from hydrothermal vent in East China Sea, Taiwan, China - gui-2014 surface metaT	BGI Tech Solutions Co., Ltd.				Illumina HiSeq 2000		East China Sea, Taiwan, China	durface of the hydrothermal vent	25	128		12450632	26850	no
3300042036	Ga0451324	Mollusc gills microbial communities from various hydrothermal vent in Atlantic Ocean	Mollusc gills microbial communities from Lucky Strike-Eifeltower hydrothermal vent, Atlantic Ocean - BazoSym_LS-ET_4_1048I	Max Planck Institute for Marine Microbiology		SAMEA5664341	ERX3367190	Illumina HiSeq 2500	1689	North Atlantic Ocean	mollusc gills	37.2829	-32.2756	2013/8/17	6841749	8684	no
3300002481	Ga0004278	Deep subsurface and oceanic microbial communities from Witwatersrand Basin, South Africa, and the Canadian and Fennoscandian shields and at the Lost City Hydrothermal Field	Deep oceanic, basalt-hosted subsurface ecosystem from Juan de Fuca Ridge flank, Pacific Ocean, CORK Borehole 1362A_J2.573	DOE Joint Genome Institute (JGI)		SAMN03166137	SRX753337, SRX1880758	Illumina HiSeq 2500	454	Juan de Fuca Ridge flank, Pacific Ocean	Juan de Fuca Ridge flank, Pacific Ocean	47.76	-127.76	2011/7/12	169908118	271595	no
2616644914	Ga0072720	Hydrothermal vent microbial communities from Crab Spa hydrothermal vent, East Pacific Rise	Bacterium SCGC AD-706-M09 (unscreened)	Bigelow Laboratory Single Cell Genomics Center (SCGC)				Illumina		Pacific Ocean: East Pacific Rise, Crab Spa		9.83997	-104.294		562630	549	no
2728369421	Ga0180891	Deep subsurface and oceanic microbial communities from Witwatersrand Basin, South Africa, and the Canadian and Fennoscandian shields and at the Lost City Hydrothermal Field	Thermoanaerobacterales bacterium JdFR-68	DOE Joint Genome Institute (JGI)											2975652	3143	no
2616644897	Ga0072703	Hydrothermal vent microbial communities from Crab Spa hydrothermal vent, East Pacific Rise	Sulfurovum sp. SCGC AD-698-G16 (contamination screened)	Bigelow Laboratory Single Cell Genomics Center (SCGC)				Illumina		Pacific Ocean: East Pacific Rise, Crab Spa		9.83997	-104.294		1015564	1088	no
2836470896	Ga0400595	Hydrothermal Fe-rich Mat Reference Genomes	Unclassified Zetaproteobacteria bacterium 667-BS4_FULL_No.6_4.1_69	University of Delaware											1346574	1456	no
2616644889	Ga0072695	Hydrothermal vent microbial communities from Crab Spa hydrothermal vent, East Pacific Rise	Sulfurimonas sp. SCGC AD-690-A20 (contamination screened)	Bigelow Laboratory Single Cell Genomics Center (SCGC)				Illumina		Pacific Ocean: East Pacific Rise, Crab Spa		9.83997	-104.294		1189252	1235	no
3300006084	Ga0081982	Diffuse hydrothermal flow volcanic vent microbial communities from Axial Seamount, northeast Pacific Ocean	Diffuse hydrothermal flow volcanic vent microbial communities from Axial Seamount, northeast Pacific ocean - Sample CTD1200_DNA	Marine Biological Laboratory				Illumina HiSeq 1000	1200	North Pacific Ocean: Axial Seamount	Axial Seamount caldera, 1200m depth	45.9332	-129.999	2014/8/16	35162592	104644	no
3300003736	Ga0062511	Diffuse hydrothermal flow volcanic vent microbial communities from Axial Seamount, northeast Pacific Ocean	Diffuse hydrothermal flow volcanic vent microbial communities from Axial Seamount, northeast Pacific ocean - Sample FS904_55_13L	Marine Biological Laboratory				Illumina HiSeq 1000	1516	Marker 33 diffuse flow vent, Axial Seamount	Marker 33 diffuse flow vent, Axial Seamount	45.9332	-129.982		749601	2019	no
3300005264	Ga0073581	Hydrothermal sediment microbial communities from Guaymas Basin, California, USA	Hydrothermal sediment microbial communities from Guaymas Basin, California, USA 4572. Combined assembly of Gp0115316 and Gp0146562	University of Texas, Austin					0.000000 to 0.120000	Guaymus Basin	Guaymus Basin	n/a	n/a		291954024	312472	yes
3300044576	Ga0485627	Marine microbial communities from various hydrothermal vent chimneys in Pacific Ocean	Marine hydrothermal vent microbial communities from Ultra No Chi Chi chimney, Urashima Vent Field, Pacific Ocean - 801CCC	Western Washington University				Illumina MiSeq	1584	Urashima Vent Field, Pacific Ocean	Ultra No Chi Chi Chimney, Urashima Vent Field, Pacific Ocean	13	144	2014/12	209464453	438875	yes
3300022233	Ga0236253	Characterization of microbial community from Mariana Back Arc	Hydrothermal fluids microbial communities from Mariana Back-Arc Basin vent fields, Pacific Ocean - Illium_FS922_RNA-SIP 150_kmer	Marine Biological Laboratory				Illumina NextSeq	3582.53	Illium vent field, Mariana back arc basin	Illium vent field	18.2136	144.707	2016/12/6	1111783	2158	no
3300003690	Ga0062366	Hydrothermal vent plume microbial communities from the Mid Cayman Rise - Piccard2013-Plume	Hydrothermal vent plume microbial communities from the Mid Cayman Rise - Piccard2013-Plume - Viral/microbial metagenome assembly	University of Michigan				Illumina HiSeq 2000		Mid-Cayman Rise, Caribbean Sea	Mixed hydrothermal plume and background waters	53			75062163	94674	no
3300010421	Ga0137502	Diffuse hydrothermal flow volcanic vent microbial communities from Axial Seamount, northeast Pacific Ocean	Diffuse hydrothermal flow volcanic vent microbial communities from Axial Seamount, northeast Pacific ocean - Sample LVWS5_30_TP1_12L	Marine Biological Laboratory				Illumina HiSeq 1000	1542	Northeast Pacific Ocean: Anemone vent, Axial Seamount	Anemone diffuse flow vent, Axial Seamount	45.933	-130.014	2014/8	1482593	3659	no
2836461534	Ga0400585	Hydrothermal Fe-rich Mat Reference Genomes	Unclassified Zetaproteobacteria bacterium 665-MMA12_FULL_No.5_2.4_22	University of Delaware											378100	490	no
2728369412	Ga0180914	Deep subsurface and oceanic microbial communities from Witwatersrand Basin, South Africa, and the Canadian and Fennoscandian shields and at the Lost City Hydrothermal Field	Candidatus Acetothermia bacterium JdFR-49	DOE Joint Genome Institute (JGI)											1698648	2008	no
2617270841	Ga0073556	Genome sequencing of Thermotogales isolates from hydrothermal vents	Thermosipho melanesiensis 431	Norwegian Sequencing Centre (NSC)		SAMN02650334		PacBio RS		Pacific ocean, Lau Basin	Pacific ocean, Lau Basin				1915344	1929	no
3300006612	Ga0101558	Diffuse hydrothermal flow volcanic vent microbial communities from Axial Seamount, northeast Pacific Ocean	Diffuse hydrothermal flow volcanic vent microbial communities from Axial Seamount, northeast Pacific ocean - Sample FS904_Marker33_DNA	The Marine Biological Laboratory				Illumina	1516	North Pacific Ocean: Axial Seamount	Marker 33 diffuse flow vent, Axial Seamount	45.9332	-129.982		210579501	516104	no
2836486931	Ga0400611	Hydrothermal Fe-rich Mat Reference Genomes	Unclassified Zetaproteobacteria bacterium S7_FULL_No.1_16.2_89	University of Delaware											1646406	1913	no
2728369300	Ga0180923	Deep subsurface and oceanic microbial communities from Witwatersrand Basin, South Africa, and the Canadian and Fennoscandian shields and at the Lost City Hydrothermal Field	Candidatus Bathyarchaeota archaeon JdFR-10	DOE Joint Genome Institute (JGI)											1817752	2015	no
2728369430	Ga0180846	Deep subsurface and oceanic microbial communities from Witwatersrand Basin, South Africa, and the Canadian and Fennoscandian shields and at the Lost City Hydrothermal Field	Candidatus Aminicenantes bacterium JdFR-77	DOE Joint Genome Institute (JGI)											2326237	2363	no
3300001678	Ga0012515	Black smokers hydrothermal plume microbial communities from Mariner, Lau Basin, Pacific Ocean	Black smokers hydrothermal plume microbial communities from Mariner, Lau Basin, Pacific Ocean -IDBA	University of Michigan				Illumina HiSeq 2000	1900	Mariner, Lau Basin, Pacific Ocean	Mariner, Lau Basin, Pacific Ocean	-20.1801	-176.601		160783924	205440	no
2728369305	Ga0180858	Deep subsurface and oceanic microbial communities from Witwatersrand Basin, South Africa, and the Canadian and Fennoscandian shields and at the Lost City Hydrothermal Field	Euryarchaeota archaeon JdFR-21	DOE Joint Genome Institute (JGI)											1416500	1701	no
2617270846	Ga0073568	Genome sequencing of Thermotogales isolates from hydrothermal vents	Thermosipho sp. 1223	Norwegian Sequencing Centre (NSC)		SAMN03483420		Illumina MiSeq		Atlantic ocean, Rainbow Hydrothermal vents field	Atlantic ocean, Rainbow Hydrothermal vents field				1767555	1776	no
2728369435	Ga0180902	Deep subsurface and oceanic microbial communities from Witwatersrand Basin, South Africa, and the Canadian and Fennoscandian shields and at the Lost City Hydrothermal Field	Unclassified bacterium JdFR-67	DOE Joint Genome Institute (JGI)											873684	975	no
3300019448	Ga0193937	Microbial communities from sediments and microbial mats in various locations	Sorted cell/s from Southern Trench hydrothermal vent microbial mat, Guaymas Basin, Mexico - 6AG_4869_18_01	DOE Joint Genome Institute (JGI)		SAMN08779212	SRX3974426	Illumina NextSeq-HO	2001	Mexico: Guaymas Basin	hydrothermal vent orange microbial mat from Ultra Mound gradient site	27.001	-110.6	2016/12/21	9467632	11561	no
3300003526	Ga0060311	Diffuse hydrothermal flow volcanic vent microbial communities from Axial Seamount, northeast Pacific Ocean	Diffuse hydrothermal flow volcanic vent microbial communities from Axial Seamount, northeast Pacific ocean - Sample LVWS2_TP1_12L					Illumina	1542	North Pacific Ocean: Axial Seamount	Anemone diffuse flow vent, Axial seamount	45.9333	-130.014		1890616	4811	no
3300010426	Ga0137495	Diffuse hydrothermal flow volcanic vent microbial communities from Axial Seamount, northeast Pacific Ocean	Diffuse hydrothermal flow volcanic vent microbial communities from Axial Seamount, northeast Pacific ocean - Sample FS906_80_TP1_13H	Marine Biological Laboratory				Illumina HiSeq 1000	1522	Marker 113, Axial Seamount, Northeast Pacific Ocean	Marker 113 diffuse flow vent, Axial Seamount	45.9227	-129.988	2014/8	3064922	6824	yes
2836455305	Ga0400581	Hydrothermal Fe-rich Mat Reference Genomes	Unclassified Zetaproteobacteria bacterium 665-MMA12_FULL_No.1_18.7_97	University of Delaware											2174491	2211	no
2772190962	Ga0261632	Hydrothermal Fe-rich Mat Reference Genomes	Unclassified Zetaproteobacteria bacterium S1_FULL_No.4_2.7_85	University of Delaware											1850095	2043	no
2772191016	Ga0262981	Hydrothermal Fe-rich Mat Reference Genomes	Unclassified Zetaproteobacteria bacterium S6_FULL_No.19_0.9_74	University of Delaware											1912789	2151	no
3300023439	Ga0256752	Hydrothermal Fe-rich Mat Reference Genomes	Hydrothermal Fe-rich mat microbial community from TAG Site, Mid-Atlantic Ridge, Atlantic Ocean - 665-MMA12	University of Delaware				Illumina HiSeq 2500	3626.4	International: TAG Site, Mid-Atlantic Ridge	Trans-Atlantic Geotraverse (TAG) Site	26.1372	-44.8264	2012/10/23	160924757	261775	no
3300003537	Ga0060338	Diffuse hydrothermal flow volcanic vent microbial communities from Axial Seamount, northeast Pacific Ocean	Diffuse hydrothermal flow volcanic vent microbial communities from Axial Seamount, northeast Pacific ocean - Sample FS903_Marker113_DNA	The Marine Biological Laboratory				Illumina	1522	North Pacific Ocean: Axial Seamount	Marker 113 diffuse flow vent, Axial Seamount	45.9227	-129.988		193269043	461742	no
3300021468	Ga0190360	Microbial communities from sediments and microbial mats in various locations	Hydrothermal vent microbial mat bacterial communities from Southern Trench, Guaymas Basin, Mexico - 4872-18-3-4_MG	DOE Joint Genome Institute (JGI)		SAMN08779267	SRX3982322	Illumina HiSeq 2500-1TB	2011	Mexico: Guaymas Basin	Cathedral Hill gradient site, white microbial mat	27.0114	-110.596	2016/12/24	516607444	1034703	yes
2728369458	Ga0180940	Deep subsurface and oceanic microbial communities from Witwatersrand Basin, South Africa, and the Canadian and Fennoscandian shields and at the Lost City Hydrothermal Field	Dehalococcoides sp. JdFR-55	DOE Joint Genome Institute (JGI)											545773	591	no
2616644862	Ga0072654	Hydrothermal vent microbial communities from Crab Spa hydrothermal vent, East Pacific Rise	Aquificae bacterium SCGC AAA040-G05 (unscreened)	Bigelow Laboratory Single Cell Genomics Center (SCGC)				Illumina		Pacific Ocean: East Pacific Rise, Crab Spa		9.83997	-104.294		432678	469	no
3300028908	Ga0256914	Marine microbial communities from hydrothermal vents in the Atlantic and Pacific Ocean	Hydrothermal chimney microbial communities from Main Endeavour vent field at the Juan de Fuca Ridge, Pacific Ocean - Hulk	DOE Joint Genome Institute (JGI)		SAMN10864365	SRX5344193	Illumina HiSeq 2500-1TB	2190	Pacific Ocean: Juan de Fuca Ridge	hydrothermal chimney	47.5696	-129.59	2010/7/19	555852493	943778	yes
3300001783	Ga0013018	Hydrothermal vent plume microbial communities from the Cayman Rise, Cayman Islands	Hydrothermal vent plume microbial communities from the Mid Cayman Rise - Vondamm Sites	University of Michigan				Illumina HiSeq 2000	2000	Vondamm Vents, Mid Cayman Rise	Vondamm Vents, Mid Cayman Rise	18.35	-81.85		319540913	490677	no
2836539785	Ga0400650	Hydrothermal Fe-rich Mat Reference Genomes	Unclassified Zetaproteobacteria bacterium 481-BS4_FULL_No.6_1.9_92	Western Washington University											2797002	3147	no
8046654717	Ga0615528	Dissulfurimicrobium hydrothermale Sh68 genome sequencing	Dissulfurimicrobium hydrothermale Sh68	European Institute of the Sea (IUEM)		SAMN22120204		Illumina MiSeq	0.3	Russia		54.494	160.01		2025450	2002	no
2772191011	Ga0262976	Hydrothermal Fe-rich Mat Reference Genomes	Unclassified Zetaproteobacteria bacterium S6_FULL_No.11_2.2_88	University of Delaware											2172249	2259	no
3300039136	Ga0243145	Sediment and seawater microbial communities from hydrothermal vent in Taiwan, China	Seawater microbial communities from hydrothermal vent in Taiwan, China - Y4	Xiamen University		SAMN06199458	SRX2538515	Illumina HiSeq 2500	0	China: Taiwan	coastal water body	24.8348	121.962	2015/5/26	96802060	175944	no
3300007756	Ga0105664	Diffuse hydrothermal flow volcanic vent microbial communities from Axial Seamount, northeast Pacific Ocean	Diffuse hydrothermal flow volcanic vent microbial communities from Axial Seamount, northeast Pacific ocean - Sample CTDBack_2015_DNA CLC_assembly	Marine Biological Laboratory				Illumina NextSeq	1500	Northeast Pacific Ocean	Northeast Pacific Ocean	45.9372	-130.082	2015/8/15	198165383	377027	no
2616644890	Ga0072696	Hydrothermal vent microbial communities from Crab Spa hydrothermal vent, East Pacific Rise	Sulfurimonas sp. SCGC AD-690-C15 (contamination screened)	Bigelow Laboratory Single Cell Genomics Center (SCGC)				Illumina		Pacific Ocean: East Pacific Rise, Crab Spa		9.83997	-104.294		718737	762	no
2836478982	Ga0400601	Hydrothermal Fe-rich Mat Reference Genomes	Unclassified Zetaproteobacteria bacterium 667-BS4_FULL_No.12_2.0_34	University of Delaware											826203	940	no
3300050924	Ga0504800	Sorted cell/s from hydrothermal vent fluid, Lost City Hydrothermal field, North Atlantic Ocean	Sorted cell/s from hydrothermal vent fluid, Lost City Hydrothermal field, North Atlantic Ocean - AH-954-I18	DOE Joint Genome Institute (JGI)		SAMN49208335	SRX29499812	Illumina NovaSeq S4		North Atlantic Ocean	hydrothermal vent fluid	30.1194	-42.1248	2018/9/21	1301167	1407	no
3300026518	Ga0256829	Marine microbial communities from hydrothermal vents in the Atlantic and Pacific Ocean	Hydrothermal vent microbial communities from Lau Basin, Pacific Ocean - 131-447	DOE Joint Genome Institute (JGI)		SAMN09093798	SRX4801601	Illumina HiSeq 2500-1TB	1918	Pacific Ocean: Lau Basin	Hydrothermal sulfide rock	-22.1802	-176.601	2005/4/22	408311357	685938	yes
2893478082	Ga0454286	Hydrothermal Fe-rich Mat Reference Genomes	Unclassified Deltaproteobacteria bacterium S6_FULL_No.2_5.2_93	University of Delaware											2237574	2097	no
3300008062	Ga0114372	Marine sediment microbial communities from shallow-sea hydrothermal vent, Milos, Greece	Marine sediment microbial communities from shallow-sea hydrothermal vent, Milos, Greece - SG7	National Aeronautics and Space Administration (NASA)					0.010000 to 0.200000	Milos, Greece	marine sediment	36.6749	24.5209	2014/5/24	121466297	335248	no
2616644895	Ga0072702	Hydrothermal vent microbial communities from Crab Spa hydrothermal vent, East Pacific Rise	Bacteroidetes bacterium SCGC AD-698-B15 (unscreened)	Bigelow Laboratory Single Cell Genomics Center (SCGC)				Illumina		Pacific Ocean: East Pacific Rise, Crab Spa		9.83997	-104.294		1812196	1592	no
3300010902	Ga0137770	Diffuse hydrothermal flow volcanic vent microbial communities from Axial Seamount, northeast Pacific Ocean	Diffuse hydrothermal flow volcanic vent microbial communities from Axial Seamount, northeast Pacific ocean - Sample FS917_55_12C_TP1_INC3_10	Marine Biological Laboratory				Illumina HiSeq 1000	1516	Marker 33, Axial Seamount, Northeast Pacific Ocean	Marker 33 diffuse flow vent, Axial Seamount	45.9332	-129.982	2015/8	1309598	2501	no
3300019398	Ga0193924	Microbial communities from sediments and microbial mats in various locations	Sorted cell/s from Southern Trench hydrothermal vent microbial mat, Guaymas Basin, Mexico - 6M_4868_08_02	DOE Joint Genome Institute (JGI)		SAMN08778857	SRX3974092	Illumina NextSeq-HO	2002	Mexico: Guaymas Basin	hydrothermal vent yellow microbial mat from Ultra Mound, Coring site 1	27.001	-110.6	2016/12/19	1236683	1606	no
3300023444	Ga0256747	Hydrothermal Fe-rich Mat Reference Genomes	Hydrothermal Fe-rich mat microbial community from Loihi Seamount, Hawaii, USA - 675-SC9	University of Delaware				Illumina HiSeq 2500	1299.98	USA: Loihi Seamount, Hawaii	Hiolo North (Upper Marker #31)	18.9064	-155.257	2013/3/28	582536762	850440	no
2836577160	Ga0400685	Hydrothermal Fe-rich Mat Reference Genomes	Unclassified Zetaproteobacteria bacterium 483-BS63_FULL_No.5_2.8_22	Western Washington University											616222	793	no
2728369437	Ga0180900	Deep subsurface and oceanic microbial communities from Witwatersrand Basin, South Africa, and the Canadian and Fennoscandian shields and at the Lost City Hydrothermal Field	Unclassified bacterium JdFR-65	DOE Joint Genome Institute (JGI)											936826	1110	no
2728369307	Ga0180907	Deep subsurface and oceanic microbial communities from Witwatersrand Basin, South Africa, and the Canadian and Fennoscandian shields and at the Lost City Hydrothermal Field	Archaeoglobus sp. JdFR-39	DOE Joint Genome Institute (JGI)											2279225	2736	no
3300001458	Ga0012421	Hydrothermal vent plume microbial communities from the Cayman Rise, Cayman Islands	Hydrothermal vent plume microbial communities from the Mid Cayman Rise - All Sites - gte1k	University of Michigan				Illumina HiSeq 2000	2000.000000 to 4000.000000	Mid Cayman Rise, Cayman Islands, United Kingdom	Plume and Background deep sea around the Mid Cayman Rise	18.35	-81.85		153768584	216865	no
3300050950	Ga0504828	Sorted cell/s from hydrothermal vent fluid, Lost City Hydrothermal field, North Atlantic Ocean	Sorted cell/s from hydrothermal vent fluid, Lost City Hydrothermal field, North Atlantic Ocean - AH-956-L13	DOE Joint Genome Institute (JGI)		SAMN49208280	SRX29505331	Illumina NovaSeq S4		North Atlantic Ocean	hydrothermal vent fluid	30.1197	-42.1244	2018/9/21	387099	469	no
3300002763	Ga0047373	Diffuse hydrothermal flow volcanic vent microbial communities from Axial Seamount, northeast Pacific Ocean	Diffuse hydrothermal flow volcanic vent microbial communities from Axial Seamount, northeast Pacific ocean - Sample LVWS1_TP1_13H					Illumina		Marker 113, Axial Seamount, Northeast Pacific Ocean	Marker 113 diffuse flow vent, Axial Seamount	45.9227	-129.988		511605	1273	no
3300008701	Ga0103615	Microbial communities from hydrothermal vents in Mid Cayman Rise, Atlantic Ocean	Microbial communities from hydrothermal vents in Mid Cayman Rise, Atlantic Ocean - J2-614-04	University of Michigan		SAMN03609708	SRX1043668	Illumina HiSeq 2500		Atlantic Ocean	Atlantic Ocean,Mid Cayman Rise			2012/1	1985584	8891	no
2630968212	Ga0078070	Single Amplified Genomes from Iheya North hydrothermal field in the Okinawa Trough	Anaerolinea sp. SCGC AC-711-B22 (contamination screened)	Bigelow Laboratory Single Cell Genomics Center (SCGC)				Illumina		Pacific Ocean	Okinawa Trough				1423460	1444	no
3300050955	Ga0504834	Sorted cell/s from hydrothermal vent fluid, Lost City Hydrothermal field, North Atlantic Ocean	Sorted cell/s from hydrothermal vent fluid, Lost City Hydrothermal field, North Atlantic Ocean - AH-956-O14	DOE Joint Genome Institute (JGI)		SAMN49208271	SRX29504544	Illumina NovaSeq S4		North Atlantic Ocean	hydrothermal vent fluid	30.1197	-42.1244	2018/9/21	1236476	1392	no
3300008647	Ga0103616	Microbial communities from hydrothermal vents in Mid Cayman Rise, Atlantic Ocean	Microbial communities from hydrothermal vents in Mid Cayman Rise, Atlantic Ocean - J2-614-07	University of Michigan		SAMN03609709	SRX1043671	Illumina HiSeq 2500		Atlantic Ocean	Atlantic Ocean,Mid Cayman Rise			2012/1	1372584	5869	no
2772190964	Ga0261635	Hydrothermal Fe-rich Mat Reference Genomes	Unclassified Zetaproteobacteria bacterium S1_FULL_No.6_1.1_96	University of Delaware											2070515	2341	no
3300021978	Ga0232646	Characterization of microbial community from Mariana Back Arc	Hydrothermal fluids microbial communities from Mariana Back-Arc Basin vent fields, Pacific Ocean - Perseverance_CTD_V16A_01_btl17 _150kmer	Marine Biological Laboratory				Illumina NextSeq	3625	Perseverance vent field water column	Perseverance vent field water column, Mariana back arc basin	15.4799	144.508	2016/12/13	556025724	1098648	no
3300050916	Ga0504792	Sorted cell/s from hydrothermal vent fluid, Lost City Hydrothermal field, North Atlantic Ocean	Sorted cell/s from hydrothermal vent fluid, Lost City Hydrothermal field, North Atlantic Ocean - AH-954-F20	DOE Joint Genome Institute (JGI)		SAMN49211298	SRX29499853	Illumina NovaSeq S4		North Atlantic Ocean	hydrothermal vent fluid	30.1194	-42.1248	2018/9/21	1608983	1726	no
3300013781	Ga0180405	Microbial community analysis of hydrothermal vent diffuse flow samples from Mid-Cayman Rise, Pacific Ocean	Microbial community analysis of hydrothermal vent diffuse flow samples from Mid-Cayman Rise, Pacific Ocean - FS851 IDBA reassembly	Marine Biological Laboratory				Illumina HiSeq	4988	Mid-Cayman Rise	diffuse flow hydrothermal vent	18.5472	-81.7182	2012/1/20	8989129	11563	yes
2836542933	Ga0400651	Hydrothermal Fe-rich Mat Reference Genomes	Unclassified Zetaproteobacteria bacterium 481-BS4_FULL_No.7_1.7_99	Western Washington University											2585785	2648	no
3300021588	Ga0190285	Microbial communities from sediments and microbial mats in various locations	Hydrothermal vent microbial mat bacterial communities from Southern Trench, Guaymas Basin, Mexico - 4869-18-2-3_MG	DOE Joint Genome Institute (JGI)		SAMN08779427	SRX30218238	Illumina HiSeq 2500-1TB	2001	Mexico: Guaymas Basin	Ultra Mound gradient site, orange microbial mat	27.0074	-110.591	2016/12/21	95272852	208464	yes
3300048636	Ga0496632	Hydrothermal vents viral and microbial communities from various locations in Pacific Ocean	Hydrothermal vent plume microbial communities from North Pacific Ocean - CTD-AT42-06-007-2500m-0.65	DOE Joint Genome Institute (JGI)		SAMN51146294	SRX30606977	Illumina NovaSeq S4	2500	North Pacific Ocean	Pelagic ocean, hydrothermal vent plume	9.83807	-104.291	2018/12/12	535554427	892239	yes
3300050911	Ga0504787	Sorted cell/s from hydrothermal vent fluid, Lost City Hydrothermal field, North Atlantic Ocean	Sorted cell/s from hydrothermal vent fluid, Lost City Hydrothermal field, North Atlantic Ocean - AH-954-C11	DOE Joint Genome Institute (JGI)		SAMN49212190	SRX29497731	Illumina NovaSeq S4		North Atlantic Ocean	hydrothermal vent fluid	30.1194	-42.1248	2018/9/21	633792	616	no
3300010433	Ga0137509	Diffuse hydrothermal flow volcanic vent microbial communities from Axial Seamount, northeast Pacific Ocean	Diffuse hydrothermal flow volcanic vent microbial communities from Axial Seamount, northeast Pacific ocean - Sample LVWS5_30_TP2_13H	Marine Biological Laboratory				Illumina HiSeq 1000	1542	Northeast Pacific Ocean: Anemone vent, Axial Seamount	Anemone diffuse flow vent, Axial Seamount	45.933	-130.014	2014/8	436910	1142	no
3300003533	Ga0060340	Diffuse hydrothermal flow volcanic vent microbial communities from Axial Seamount, northeast Pacific Ocean	Diffuse hydrothermal flow volcanic vent microbial communities from Axial Seamount, northeast Pacific ocean - Sample FS904_Marker33_RNA	The Marine Biological Laboratory				Illumina	1516	North Pacific Ocean: Axial Seamount	Marker 33 diffuse flow vent, Axial Seamount	45.9332	-129.982		7392897	24385	no
3300013786	Ga0180413	Microbial community analysis of hydrothermal vent diffuse flow samples from Mid-Cayman Rise, Pacific Ocean	Microbial community analysis of hydrothermal vent diffuse flow samples from Mid-Cayman Rise, Pacific Ocean - FS877 IDBA reassembly	Marine Biological Laboratory				Illumina HiSeq	2304	Mid Cayman Rise	diffuse flow from Shrimp Buttery, Von Damm, Mid Cayman Rise	18.377	-81.798	2013/6/27	18851012	22302	no
3300003952	Ga0064024	Diffuse hydrothermal flow volcanic vent microbial communities from Axial Seamount, northeast Pacific Ocean	Diffuse hydrothermal flow volcanic vent microbial communities from Axial Seamount, northeast Pacific ocean - Sample FS907_80_12INC	Marine Biological Laboratory				Illumina HiSeq, Illumina HiSeq 1000	1542	Northeast Pacific Ocean: Anemone vent, Axial Seamount	Anemone diffuse flow vent, Axial seamount	45.933	-130.014		1748651	6112	yes
2616644864	Ga0072656	Hydrothermal vent microbial communities from Crab Spa hydrothermal vent, East Pacific Rise	Bacterium SCGC AC-213-C05 (unscreened)	Bigelow Laboratory Single Cell Genomics Center (SCGC)				Illumina		Pacific Ocean: East Pacific Rise, Crab Spa		9.83997	-104.294		661067	610	no
3300048631	Ga0496626	Hydrothermal vents viral and microbial communities from various locations in Pacific Ocean	Hydrothermal vent plume microbial communities from North Pacific Ocean - CTD007B	DOE Joint Genome Institute (JGI)		SAMN51146346	SRX30606933	Illumina NovaSeq S4	2500	North Pacific Ocean	Pelagic ocean, hydrothermal vent plume	9.83807	-104.291	2018/12/12	667787720	1100597	no
3300042708	Ga0454351	Microbial symbiotic communities from bathmodiolin mussel gills	Mollusc gills microbial communities from Lilliput hydrothermal vent, Atlantic Ocean - BspSym_Li_3_10-5 Re-assembly	Max Planck Institute for Marine Microbiology		SAMEA5664329	ERX3367178	Illumina HiSeq 2500	1494	South Atlantic Ocean	mollusc gills	-9.54817	-13.2088	2009/4/29	189210821	178551	no
3300010904	Ga0137767	Diffuse hydrothermal flow volcanic vent microbial communities from Axial Seamount, northeast Pacific Ocean	Diffuse hydrothermal flow volcanic vent microbial communities from Axial Seamount, northeast Pacific ocean - Sample FS917_55_12C_TP1_INC3_7	Marine Biological Laboratory				Illumina HiSeq 1000	1516	Marker 33, Axial Seamount, Northeast Pacific Ocean	Marker 33 diffuse flow vent, Axial Seamount	45.9332	-129.982	2015/8	1375686	2711	no
3300002767	Ga0047374	Diffuse hydrothermal flow volcanic vent microbial communities from Axial Seamount, northeast Pacific Ocean	Diffuse hydrothermal flow volcanic vent microbial communities from Axial Seamount, northeast Pacific ocean - Sample LVWS1_TP1_13L					Illumina	1522	Marker 113, Axial Seamount, Northeast Pacific Ocean	Marker 113 diffuse flow vent, Axial Seamount	45.9227	-129.988		921200	3339	no
3300023442	Ga0256751	Hydrothermal Fe-rich Mat Reference Genomes	Hydrothermal Fe-rich mat microbial community from Rainbow Site, Mid-Atlantic Ridge, Atlantic Ocean - 664-SC8	University of Delaware				Illumina HiSeq 2500	2294.86	International: Rainbow Site, Mid-Atlantic Ridge	Rainbow Site	36.2293	-33.9028	2012/10/19	389358363	609080	yes
2728369303	Ga0180848	Deep subsurface and oceanic microbial communities from Witwatersrand Basin, South Africa, and the Canadian and Fennoscandian shields and at the Lost City Hydrothermal Field	Candidatus Bathyarchaeota archaeon JdFR-01	DOE Joint Genome Institute (JGI)											200493	255	no
2728369329	Ga0180931	Deep subsurface and oceanic microbial communities from Witwatersrand Basin, South Africa, and the Canadian and Fennoscandian shields and at the Lost City Hydrothermal Field	Archaeoglobus sp. JdFR-23	DOE Joint Genome Institute (JGI)											1629140	1918	no
3300041961	Ga0456192	Diffuse hydrothermal flow volcanic vent microbial communities from Axial Seamount, northeast Pacific Ocean	Diffuse hydrothermal flow volcanic vent microbial communities from Axial Seamount, northeast Pacific ocean - Sample FS914_Anemone_DNA SE_2020	Marine Biological Laboratory				Illumina NextSeq	1541	Northeast Pacific Ocean: Anemone vent, Axial Seamount	Anemone Vent, Axial Seamount, northeast Pacific Ocean	45.9332	-130.014	2015/8/24	583619087	1242165	no
2728369433	Ga0180909	Deep subsurface and oceanic microbial communities from Witwatersrand Basin, South Africa, and the Canadian and Fennoscandian shields and at the Lost City Hydrothermal Field	Dehalococcoides sp. JdFR-54	DOE Joint Genome Institute (JGI)											1691297	1733	no
3300001669	Ga0012480	Alviniconcha endosymbiont microbial communities from the Eastern Lau Spreading center hydrothermal vents, Pacific Ocean	GammaLau_v2	Harvard University				Illumina HiSeq 2000	1870.48	Eastern Lau Spreading Center, Tu'i Malila	Alviniconcha endosymbiont	-21.99	-176.568	2009/5/29	2122165	2302	no
3300050922	Ga0504798	Sorted cell/s from hydrothermal vent fluid, Lost City Hydrothermal field, North Atlantic Ocean	Sorted cell/s from hydrothermal vent fluid, Lost City Hydrothermal field, North Atlantic Ocean - AH-954-G23	DOE Joint Genome Institute (JGI)		SAMN49217431	SRX29505408	Illumina NovaSeq S4		North Atlantic Ocean	hydrothermal vent fluid	30.1194	-42.1248	2018/9/21	816060	906	no
3300003136	Ga0051099	Marine microbial communities from the Lost City Hydrothermal Field	Marine microbial communities from the Lost City Hydrothermal Field	DOE Joint Genome Institute (JGI)				454 GS FLX	731	Lost City Hydrothermal Field, Atlantic Ocean	Lost City Hydrothermal Field, Atlantic Ocean	30.12	-42.12	2005/7/27	24827591	45285	no
3300009491	Ga0119765	Microbial community analysis of hydrothermal vent diffuse flow samples from Mid-Cayman Rise, Pacific Ocean	Microbial community analysis of hydrothermal vent diffuse flow samples from Mid-Cayman Rise, Pacific Ocean - FS851 no min length	Marine Biological Laboratory				Illumina HiSeq	4988	Mid-Cayman Rise	diffuse flow hydrothermal vent	18.5472	-81.7182	2012/1/20	267671278	1313040	no
3300028031	Ga0256847	Marine microbial communities from hydrothermal vents in the Atlantic and Pacific Ocean	Hydrothermal vent microbial communities from East Pacific Rise, Pacific Ocean - Teddybear	DOE Joint Genome Institute (JGI)		SAMN10350720	SRX5246860	Illumina HiSeq 2500-1TB	2514	Pacific Ocean: East Pacific Rise	Basalt with filaments	9.8472	-104.297	2014/11/8	604341212	1269686	no
3300001771	Ga0013015	Hydrothermal vent plume microbial communities from the Cayman Rise, Cayman Islands	Hydrothermal vent plume microbial communities from the Mid Cayman Rise - Beebe Sites	University of Michigan				Illumina HiSeq 2000	4000	Beebe Vents, Mid Cayman Rise	Beebe Vents, Mid Cayman Rise	18.35	-81.85		113560268	164902	no
2836485472	Ga0400609	Hydrothermal Fe-rich Mat Reference Genomes	Unclassified Zetaproteobacteria bacterium 667-BS4_FULL_No.19_0.9_47	University of Delaware											854933	1022	no
3300008582	Ga0103612	Microbial communities from hydrothermal vents in Mid Cayman Rise, Atlantic Ocean	Microbial communities from hydrothermal vents in Mid Cayman Rise, Atlantic Ocean - CTD-11-62	University of Michigan		SAMN03609705	SRX1043723	Illumina HiSeq 2500		Atlantic Ocean	Atlantic Ocean,Mid Cayman Rise			2012/1	5065914	20386	no
3300010888	Ga0137533	Diffuse hydrothermal flow volcanic vent microbial communities from Axial Seamount, northeast Pacific Ocean	Diffuse hydrothermal flow volcanic vent microbial communities from Axial Seamount, northeast Pacific ocean - Sample LVWS6_55_TP2_13L	Marine Biological Laboratory				Illumina HiSeq 1000	1516	Marker 33, Axial Seamount, Northeast Pacific Ocean	Marker 33 diffuse flow vent, Axial Seamount	45.9332	-129.982	2014/8	71368	188	no
3300005816	Ga0078532	Microbial community analysis of hydrothermal vent diffuse flow samples from Mid-Cayman Rise, Pacific Ocean	Microbial community analysis of hydrothermal vent diffuse flow samples from Mid-Cayman Rise, Pacific Ocean - FS881	Marine Biological Laboratory				Illumina HiSeq	2370	Mid Cayman Rise	Old Man Tree, Von Damm, Mid Cayman Rise	18.375	-81.797	2013/6/27	42477432	55451	yes
3300001776	Ga0013016	Hydrothermal vent plume microbial communities from the Cayman Rise, Cayman Islands	Hydrothermal vent plume microbial communities from the Mid Cayman Rise - Vondamm Supr47	University of Michigan				Illumina HiSeq 2000	2000	Vondamm Vents, Mid Cayman Rise	Vondamm Vents, Mid Cayman Rise	18.35	-81.85		150644035	219986	no
2728369432	Ga0180845	Deep subsurface and oceanic microbial communities from Witwatersrand Basin, South Africa, and the Canadian and Fennoscandian shields and at the Lost City Hydrothermal Field	Candidatus Acetothermia bacterium JdFR-48	DOE Joint Genome Institute (JGI)											1893129	1977	no
3300050923	Ga0504799	Sorted cell/s from hydrothermal vent fluid, Lost City Hydrothermal field, North Atlantic Ocean	Sorted cell/s from hydrothermal vent fluid, Lost City Hydrothermal field, North Atlantic Ocean - AH-954-I07	DOE Joint Genome Institute (JGI)		SAMN49208318	SRX29504552	Illumina NovaSeq S4		North Atlantic Ocean	hydrothermal vent fluid	30.1194	-42.1248	2018/9/21	636893	689	no
3300042706	Ga0454353	Microbial symbiotic communities from bathmodiolin mussel gills	Mollusc gills microbial communities from Lilliput hydrothermal vent, Atlantic Ocean - BspSym_Li_5_5-4 Re-assembly	Max Planck Institute for Marine Microbiology		SAMEA5664327	ERX3367176	Illumina HiSeq 2500	1494	South Atlantic Ocean	mollusc gills	-9.54817	-13.2088	2009/4/29	189381433	178948	no
2728369302	Ga0180926	Deep subsurface and oceanic microbial communities from Witwatersrand Basin, South Africa, and the Canadian and Fennoscandian shields and at the Lost City Hydrothermal Field	Euryarchaeota archaeon JdFR-20	DOE Joint Genome Institute (JGI)											1609686	2099	no
3300050909	Ga0504785	Sorted cell/s from hydrothermal vent fluid, Lost City Hydrothermal field, North Atlantic Ocean	Sorted cell/s from hydrothermal vent fluid, Lost City Hydrothermal field, North Atlantic Ocean - AH-954-B08	DOE Joint Genome Institute (JGI)		SAMN49216537	SRX29505488	Illumina NovaSeq S4		North Atlantic Ocean	hydrothermal vent fluid	30.1194	-42.1248	2018/9/21	165925	218	no
3300022695	Ga0248673	Deep Sea Chimney Vent Samples 2015 - Flores Lab	Hydrothermal vent microbial communities from dead black smoker in Mariner Vent Field, Eastern Lau Spreading Center, Pacific Ocean - I	University of California, Irvine				Illumina HiSeq 2500	1920	Mariner Vent Field, Eastern Lau Spreading Center, Pacific Ocean	hydrothermal vent	22.1802	176.601	2015/5/8	74893561	85528	no
3300041928	Ga0454713	Tubeworm-associated microbial communities from Endeavour hydrothermal vents, Juan de Fuca Ridge, Canada	Deep seawater microbial communities from Juan de Fuca Ridge, Canada - bkMV	Dalhousie University				Illumina NextSeq 550	2433	Juan de Fuca Ridge, NE Pacific, Canada	Deep seawater	48.4303	-128.682	2016/8	279905223	575142	no
3300008642	Ga0103613	Microbial communities from hydrothermal vents in Mid Cayman Rise, Atlantic Ocean	Microbial communities from hydrothermal vents in Mid Cayman Rise, Atlantic Ocean - CTD-06-45	University of Michigan		SAMN03609706	SRX1043665	Illumina HiSeq 2500		Atlantic Ocean	Atlantic Ocean,Mid Cayman Rise			2012/1	11650264	44443	no
3300010886	Ga0137524	Diffuse hydrothermal flow volcanic vent microbial communities from Axial Seamount, northeast Pacific Ocean	Diffuse hydrothermal flow volcanic vent microbial communities from Axial Seamount, northeast Pacific ocean - Sample LVWS6_30_TP2_12L	Marine Biological Laboratory				Illumina HiSeq 1000	1516	Marker 33, Axial Seamount, Northeast Pacific Ocean	Marker 33 diffuse flow vent, Axial Seamount	45.9332	-129.982	2014/8	70326	176	yes
3300042701	Ga0454359	Microbial symbiotic communities from bathmodiolin mussel gills	Mollusc gills microbial communities from Semeiov-Ash lighthouse hydrothermal vent, Atlantic Ocean - BputSym_Se-AL_1_1115A Re-assembly	Max Planck Institute for Marine Microbiology		SAMEA5664339	ERX3367188		2432	North Atlantic Ocean	mollusc gills	13.5135	-44.9631	2014/11/22	26755673	31013	no
2728369415	Ga0180899	Deep subsurface and oceanic microbial communities from Witwatersrand Basin, South Africa, and the Canadian and Fennoscandian shields and at the Lost City Hydrothermal Field	Desulfarculaceae bacterium JdFR-97	DOE Joint Genome Institute (JGI)											4102562	3894	no
3300010907	Ga0137508	Diffuse hydrothermal flow volcanic vent microbial communities from Axial Seamount, northeast Pacific Ocean	Diffuse hydrothermal flow volcanic vent microbial communities from Axial Seamount, northeast Pacific ocean - Sample LVWS5_30_TP2_12L	Marine Biological Laboratory				Illumina HiSeq 1000	1542	Northeast Pacific Ocean: Anemone vent, Axial Seamount	Anemone diffuse flow vent, Axial Seamount	45.933	-130.014	2014/8	1331412	3253	no
3300002764	Ga0047377	Diffuse hydrothermal flow volcanic vent microbial communities from Axial Seamount, northeast Pacific Ocean	Diffuse hydrothermal flow volcanic vent microbial communities from Axial Seamount, northeast Pacific ocean - Sample LVWS1_TP2_13H					Illumina	1522	Marker 113, Axial Seamount, Northeast Pacific Ocean	Marker 113 diffuse flow vent, Axial Seamount	45.9227	-129.988		660679	2221	no
2728369410	Ga0180912	Deep subsurface and oceanic microbial communities from Witwatersrand Basin, South Africa, and the Canadian and Fennoscandian shields and at the Lost City Hydrothermal Field	Pseudomonas sp. JdFR-92	DOE Joint Genome Institute (JGI)											1611073	1825	no
3300022228	Ga0236249	Characterization of microbial community from Mariana Back Arc	Hydrothermal fluids microbial communities from Mariana Back-Arc Basin vent fields, Pacific Ocean - Hafa_FS927_RNA_SIP_9hr_80 150_kmer	Marine Biological Laboratory				Illumina NextSeq	3278	Hafa Adai vent field, Mariana back arc basin	Hafa Adai vent field	16.9618	144.869	2016/12/11	3281340	4991	no
2616644867	Ga0072659	Hydrothermal vent microbial communities from Crab Spa hydrothermal vent, East Pacific Rise	Spirochaetes sp. SCGC AC-213-I23 (unscreened)	Bigelow Laboratory Single Cell Genomics Center (SCGC)				Illumina		Pacific Ocean: East Pacific Rise, Crab Spa		9.83997	-104.294		700071	677	no
3300007733	Ga0105524	Gill chamber microbial communities of deep-sea hydrothermal vent shrimp from South Atlantic Ocean	Gill chamber microbial communities of deep-sea hydrothermal vent shrimp from South Atlantic Ocean	Shanghai Hanyu Bio-Tech Co., Ltd						South Atlantic Ocean	gill chamber of shrimp	-15.1	-13.3	2012/8/3	23519039	29439	no
3300038590	Ga0188683	Serpentinized rock microbial communities from various locations	Hydrothermal vent fluid microbial communities from Atlantic Lost City Hydrothermal Field, Atlantic Ocean - LC_3862_1325	Marine Biological Laboratory		SAMN03154334	SRX748862	Illumina HiSeq 1000	733	Atlantic Ocean: Lost City Hydrothermal Field	Hydrothermal vent fluid	30.124	-42.1201	2003/4/27	106104644	230305	no
3300050918	Ga0504794	Sorted cell/s from hydrothermal vent fluid, Lost City Hydrothermal field, North Atlantic Ocean	Sorted cell/s from hydrothermal vent fluid, Lost City Hydrothermal field, North Atlantic Ocean - AH-954-G09	DOE Joint Genome Institute (JGI)		SAMN49216515	SRX29498341	Illumina NovaSeq S4		North Atlantic Ocean	hydrothermal vent fluid	30.1194	-42.1248	2018/9/21	621790	680	no
3300003510	Ga0060295	Diffuse hydrothermal flow volcanic vent microbial communities from Axial Seamount, northeast Pacific Ocean	Diffuse hydrothermal flow volcanic vent microbial communities from Axial Seamount, northeast Pacific ocean - Sample FS857_Anemone_DNA					Illumina	1543	North Pacific Ocean: Axial Seamount	Anemone diffuse flow vent, Axial seamount	45.933	-130.014	2012/8/1	28942771	68895	no
3300048638	Ga0496634	Hydrothermal vents viral and microbial communities from various locations in Pacific Ocean	Hydrothermal vent plume microbial communities from North Pacific Ocean - CTD-AT42-06-008-2490m-0.65	DOE Joint Genome Institute (JGI)		SAMN51146345	SRX30606997	Illumina NovaSeq S4	2490	North Pacific Ocean	Pelagic ocean, hydrothermal vent plume	9.83807	-104.291	2018/12/12	678795799	1110875	yes
3300039237	Ga0438690	Tubeworm-associated microbial communities from Endeavour hydrothermal vents, Juan de Fuca Ridge, Canada	Tubeworm-associated microbial communities from Endeavour hydrothermal vents, Juan de Fuca Ridge, Canada - high-flow bush EMw1	Dalhousie University				Illumina NextSeq 550	2181	Juan de Fuca Ridge, NE Pacific, Canada	Base of tubeworm bush	47.9501	-129.097	2016/8	805878359	1579913	yes
3300007290	Ga0079918	Hydrothermal vent microbial communities from Crab Spa hydrothermal vent, East Pacific Rise	Hydrothermal vent microbial communities from Crab Spa hydrothermal vent, East Pacific Rise - large volume pump, sample 2	Bigelow Laboratory Single Cell Genomics Center (SCGC)					2503	Crab Spa Hydrothermal Vent, East Pacific Rise	Crab Spa Hydrothermal Vent	9.84417	-104.297	2014/1/4	109826745	295524	no
3300040676	Ga0438893	Tubeworm-associated microbial communities from Endeavour hydrothermal vents, Juan de Fuca Ridge, Canada	Tubeworm-associated microbial communities from Endeavour hydrothermal vents, Juan de Fuca Ridge, Canada - diffuse fluids EMf2	Dalhousie University				Illumina NextSeq 550	2188	Juan de Fuca Ridge, NE Pacific	Fluids venting through tubeworm assemblage	47.9501	-129.096	2016/8	596613407	1303725	no
3300045840	Ga0495951	Deep sea sediment microbial communities from hydrothermal vent field on the Central Indian Ridge, Indian Ocean	Deep sea sediment microbial communities from hydrothermal vent field on the Central Indian Ridge, Indian Ocean - GTV1906	Chunlab				Illumina MiSeq	0.1	Indian Ocean: Central Indian Ridge	Deep sea Hydrothermal vent sediment	11.2496	66.254	2019/7/1	58409612	85288	no
3300010415	Ga0137506	Diffuse hydrothermal flow volcanic vent microbial communities from Axial Seamount, northeast Pacific Ocean	Diffuse hydrothermal flow volcanic vent microbial communities from Axial Seamount, northeast Pacific ocean - Sample LVWS4_55_TP2_13H	Marine Biological Laboratory				Illumina HiSeq 1000	1522	Marker 113, Axial Seamount, Northeast Pacific Ocean	Marker 113 diffuse flow vent, Axial Seamount	45.9227	-129.988	2014/8	639031	1377	no
3300013788	Ga0180411	Microbial community analysis of hydrothermal vent diffuse flow samples from Mid-Cayman Rise, Pacific Ocean	Microbial community analysis of hydrothermal vent diffuse flow samples from Mid-Cayman Rise, Pacific Ocean - FS872 IDBA reassembly	Marine Biological Laboratory				Illumina HiSeq	2372	Mid-Cayman Rise	Marker X18 Mid-Cayman Rise diffuse flow	18.375	-81.797	2013/6/26	50329742	54261	no
2836576042	Ga0400683	Hydrothermal Fe-rich Mat Reference Genomes	Unclassified Zetaproteobacteria bacterium 483-BS63_FULL_No.3_3.0_13	Western Washington University											217847	276	no
3300001219	Ga0012416	Hydrothermal vent plume microbial communities from the Mid Cayman Rise Von Damm vent site	Mid Cayman Rise	University of Michigan				Illumina HiSeq 2000	2238	Mid Cayman Rise	Von Damm hydrothermal vent site (Plume)	18.3763	-81.7891	2012/1/18	3204911	3255	no
3300003953	Ga0064035	Diffuse hydrothermal flow volcanic vent microbial communities from Axial Seamount, northeast Pacific Ocean	Diffuse hydrothermal flow volcanic vent microbial communities from Axial Seamount, northeast Pacific ocean - Sample FS908_80_13INC	Marine Biological Laboratory				Illumina HiSeq 1000	1516	Marker 33 diffuse flow vent, Axial Seamount	Marker 33 diffuse flow vent, Axial Seamount	45.9332	-129.982		1957109	5229	yes
2901163782	Ga0454045	Genomic Encyclopedia of Type Strains, Phase IV (KMG-IV): sequencing the most valuable type-strain genomes for metagenomic binning, comparative biology and taxonomic classification	Alkaliphilus hydrothermalis DSM 25890	DOE Joint Genome Institute (JGI)		SAMN17619974	SRX14807504	Illumina NovaSeq S4							3075942	3146	no
3300008559	Ga0103605	Microbial communities from hydrothermal vents in Mid Cayman Rise, Atlantic Ocean	Microbial communities from hydrothermal vents in Mid Cayman Rise, Atlantic Ocean - CTD-06-47	University of Michigan		SAMN03609696	SRX1043684	Illumina HiSeq 2500		Atlantic Ocean	Atlantic Ocean,Mid Cayman Rise			2012/1	43752882	162398	no
3300003532	Ga0060336	Diffuse hydrothermal flow volcanic vent microbial communities from Axial Seamount, northeast Pacific Ocean	Diffuse hydrothermal flow volcanic vent microbial communities from Axial Seamount, northeast Pacific ocean - Sample FS896_ElGuapo_RNA					Illumina	1507	North Pacific Ocean: Axial Seamount	El Guapo diffuse flow vent, Axial seamount	45.9266	-129.979		4462511	15930	no
3300010432	Ga0137511	Diffuse hydrothermal flow volcanic vent microbial communities from Axial Seamount, northeast Pacific Ocean	Diffuse hydrothermal flow volcanic vent microbial communities from Axial Seamount, northeast Pacific ocean - Sample LVWS5_30_TP2_13L	Marine Biological Laboratory				Illumina HiSeq 1000	1542	Northeast Pacific Ocean: Anemone vent, Axial Seamount	Anemone diffuse flow vent, Axial Seamount	45.933	-130.014	2014/8	254339	880	no
3300001302	Ga0012409	Hydrothermal vent plume microbial communities from the Mid Cayman Rise Von Damm vent site (2)	Mid Cayman Rise	University of Michigan				Illumina HiSeq 2000	2041	Mid Cayman Rise	Von Damm hydrothermal vent site (Plume)	18.3763	-81.7891	2012/1/18	3204748	3256	no
3300030092	Ga0188686	Serpentinized rock microbial communities from various locations	Hydrothermal vent fluid microbial communities from New Bay of Prony, New Caledonia - Prony28	Marine Biological Laboratory		SAMN03154342	SRX748870	Illumina HiSeq 1000	43	New Caledonia: Bay of Prony	Hydrothermal vent fluid	-22.3609	166.88	2005/6/14	39826329	78127	no
3300039392	Ga0438785	Tubeworm-associated microbial communities from Endeavour hydrothermal vents, Juan de Fuca Ridge, Canada	Tubeworm-associated microbial communities from Endeavour hydrothermal vents, Juan de Fuca Ridge, Canada - low-flow bush ECw11	Dalhousie University				Illumina NextSeq 550	2180	Juan de Fuca Ridge, NE Pacific	Base of tubeworm bush	47.9631	-129.092	2016/8	558078862	1145764	no
3300010903	Ga0137662	Diffuse hydrothermal flow volcanic vent microbial communities from Axial Seamount, northeast Pacific Ocean	Diffuse hydrothermal flow volcanic vent microbial communities from Axial Seamount, northeast Pacific ocean - Sample LVWS4_55_TP1_13H	Marine Biological Laboratory				Illumina HiSeq 1000	1522	Marker 113, Axial Seamount, Northeast Pacific Ocean	Marker 113 diffuse flow vent, Axial Seamount	45.9227	-129.988	2014/8	1173419	2504	no
3300008644	Ga0103608	Microbial communities from hydrothermal vents in Mid Cayman Rise, Atlantic Ocean	Microbial communities from hydrothermal vents in Mid Cayman Rise, Atlantic Ocean - CTD-08-50	University of Michigan		SAMN03609701	SRX1043698	Illumina HiSeq 2500		Atlantic Ocean	Atlantic Ocean,Mid Cayman Rise			2012/1	34277879	129075	yes
3300007758	Ga0105668	Diffuse hydrothermal flow volcanic vent microbial communities from Axial Seamount, northeast Pacific Ocean	Diffuse hydrothermal flow volcanic vent microbial communities from Axial Seamount, northeast Pacific ocean - Sample CTDPlume_2015_DNA CLC_assembly	Marine Biological Laboratory				Illumina NextSeq	1500	Axial Seamount, northeast Pacific Ocean	Axial Seamount, northeast Pacific Ocean	45.9372	-130.082	2015/8/19	222224804	394471	no
8046411336	Ga0615553	Thermus Genome sequencing	Thermus hydrothermalis SYSU G00291	School of Life Science		SAMN24662191		BGISEQ	1388	China: Tibet		28.2436	91.8108		2360711	2591	no
3300041400	Ga0453481	Diffuse flow microbial communities from hydrothermal vent near Loihi Seamount, Hawaii, USA	Diffuse flow microbial communities from hydrothermal vent near Loihi Seamount, Hawaii, USA - MH3013C7	Marine Biological Laboratory				Illumina NextSeq 500	635	USA: Kilauea Volcano, Hawaii	Diffuse flow from hydrothermal vent at Kilauea Volcano, Hawaii	19.42	-155.28	2018/8/28	4116889	5506	no
2728369434	Ga0180903	Deep subsurface and oceanic microbial communities from Witwatersrand Basin, South Africa, and the Canadian and Fennoscandian shields and at the Lost City Hydrothermal Field	Unclassified bacterium JdFR-70	DOE Joint Genome Institute (JGI)											921100	995	no
2772191009	Ga0262974	Hydrothermal Fe-rich Mat Reference Genomes	Unclassified Zetaproteobacteria bacterium S6_FULL_No.8_2.7_72	University of Delaware											1310589	1390	no
2728369304	Ga0180849	Deep subsurface and oceanic microbial communities from Witwatersrand Basin, South Africa, and the Canadian and Fennoscandian shields and at the Lost City Hydrothermal Field	Candidatus Bathyarchaeota archaeon JdFR-06	DOE Joint Genome Institute (JGI)											735249	898	no
3300002591	Ga0041817	Diffuse hydrothermal flow volcanic vent microbial communities from Axial Seamount, northeast Pacific Ocean	Diffuse hydrothermal flow volcanic vent microbial communities from Axial Seamount, northeast Pacific ocean - Sample FS903_55_13H	The Marine Biological Laboratory					1522	Marker 113, Axial Seamount, Northeast Pacific Ocean	Marker 113 diffuse flow vent, Axial Seamount	45.9227	-129.988		2394046	5673	no
3300002532	Ga0004277	Deep subsurface and oceanic microbial communities from Witwatersrand Basin, South Africa, and the Canadian and Fennoscandian shields and at the Lost City Hydrothermal Field	Deep oceanic, basalt-hosted subsurface ecosystem from Juan de Fuca Ridge flank, Pacific Ocean, CORK Borehole 1362B_J2.571	DOE Joint Genome Institute (JGI)		SAMN03166138	SRX753338, SRX1888493	Illumina HiSeq 2500	290	Juan de Fuca Ridge flank, Pacific Ocean	Juan de Fuca Ridge flank, Pacific Ocean	47.76	-127.76	2011/7/10	168044831	323415	no
3300006080	Ga0081602	Microbial communities in diffuse hydrothermal fluids of Manus Basin, Bismarck Sea	Microbial communities in diffuse hydrothermal fluids of Manus Basin, Bismarck Sea - fluid E	Max Planck Institute for Plant Breeding Research						Manus Basin, Bismarck Sea	diffuse hydrothermal fluid	-3.72064	151.675		504328220	863594	no
3300007264	Ga0079921	Hydrothermal vent microbial communities from Teddy Bear hydrothermal vent, East Pacific Rise	Hydrothermal vent microbial communities from Teddy Bear hydrothermal vent, East Pacific Rise - large volume pump, sample 8	Bigelow Laboratory Single Cell Genomics Center (SCGC)						Teddy Bear Hydrothermal Vent, East Pacific Rise	Teddy Bear Hydrothermal Vent	9.84722	-104.297	2014/1/14	42911142	119500	no
2836527188	Ga0400640	Hydrothermal Fe-rich Mat Reference Genomes	Unclassified Zetaproteobacteria bacterium 479-BS4_FULL_No.9_1.5_27	Western Washington University											417443	513	no
3300003866	Ga0062496	Diffuse hydrothermal flow volcanic vent microbial communities from Axial Seamount, northeast Pacific Ocean	Diffuse hydrothermal flow volcanic vent microbial communities from Axial Seamount, northeast Pacific ocean - Sample FS904_30_12H	Marine Biological Laboratory				Illumina HiSeq 1000	1516	Marker 33 diffuse flow vent, Axial Seamount	Marker 33 diffuse flow vent, Axial Seamount	45.9332	-129.982		6664332	19461	no
3300010969	Ga0139246	Inactive Hydrothermal Chimney Metagenome Study	Microbial communities from the outside layer of the microbial mat covering an inactive hydrothermal chimney from the Kolumbo submarine volcano, Santorini, Greece - V16_c.out	Hellenic Centre for Marine Research (HCMR)				Illumina MiSeq	503	Kolumbo submarine Volcano, Hellenic Volcanic Arc, Aegean Sea, Greece	Hydrothermal chimney	36.52	25.48		196554973	340534	no
3001940787	Ga0579024	Microbial community from the Prony Hydrothermal Field and related strains: Genome sequencing and assembly	Methanobacterium alkalithermotolerans MethCAN	Mediterranean Institute of Oceanography (MIO)		SAMN14689430		Oxford Nanopore GridION, Illumina HiSeq		New Caledonia: La Crouen spring, Canala	alkaline thermal spring	-21.5352	165.889		2187077	2235	no
2836433298	Ga0400563	Hydrothermal Fe-rich Mat Reference Genomes	Unclassified Zetaproteobacteria bacterium 664-BS3_FULL_No.2_1.0_16	University of Delaware											672048	785	no
3300050927	Ga0504803	Sorted cell/s from hydrothermal vent fluid, Lost City Hydrothermal field, North Atlantic Ocean	Sorted cell/s from hydrothermal vent fluid, Lost City Hydrothermal field, North Atlantic Ocean - AH-954-J18	DOE Joint Genome Institute (JGI)		SAMN49208312	SRX29497237	Illumina NovaSeq S4		North Atlantic Ocean	hydrothermal vent fluid	30.1194	-42.1248	2018/9/21	1471654	1534	no
3300005265	Ga0073580	Hydrothermal sediment microbial communities from Guaymas Basin, California, USA	Hydrothermal sediment microbial communities from Guaymas Basin, California, USA 4484. Combined assembly of Gp0115313 and Gp0146561	University of Texas, Austin					0.000000 to 0.010000	Guaymus Basin	Guaymus Basin	n/a	n/a		299376147	332374	yes
3300006085	Ga0081983	Diffuse hydrothermal flow volcanic vent microbial communities from Axial Seamount, northeast Pacific Ocean	Diffuse hydrothermal flow volcanic vent microbial communities from Axial Seamount, northeast Pacific ocean - Sample CTD1200 RNA	Marine Biological Laboratory				Illumina HiSeq 1000	1200	North Pacific Ocean: Axial Seamount	Axial Seamount caldera, 1200m depth	45.9332	-129.999	2015/8/16	1373407	5154	no
2836482250	Ga0400604	Hydrothermal Fe-rich Mat Reference Genomes	Unclassified Zetaproteobacteria bacterium 667-BS4_FULL_No.15_1.4_30	University of Delaware											635841	733	no
3300038564	Ga0243151	Sediment and seawater microbial communities from hydrothermal vent in Taiwan, China	Seawater microbial communities from hydrothermal vent in Taiwan, China - Y3	Xiamen University		SAMN06199457	SRX2538516	Illumina HiSeq 2500	0	China: Taiwan	coastal water body	24.835	121.962	2015/5/26	66594930	104813	no
2836489347	Ga0400613	Hydrothermal Fe-rich Mat Reference Genomes	Unclassified Zetaproteobacteria bacterium S7_FULL_No.3_6.1_74	University of Delaware											2192494	2591	no
2772190963	Ga0261634	Hydrothermal Fe-rich Mat Reference Genomes	Unclassified Zetaproteobacteria bacterium S1_FULL_No.5_1.1_66	University of Delaware											1474336	1739	no
2616644915	Ga0072824	Hydrothermal vent microbial communities from Crab Spa hydrothermal vent, East Pacific Rise	Arcobacter sp. SCGC AD-726-A05 (contamination screened)	Bigelow Laboratory Single Cell Genomics Center (SCGC)				Illumina		Pacific Ocean: East Pacific Rise, Crab Spa		9.83997	-104.294		1013821	1072	no
2728369456	Ga0180942	Deep subsurface and oceanic microbial communities from Witwatersrand Basin, South Africa, and the Canadian and Fennoscandian shields and at the Lost City Hydrothermal Field	Dehalococcoides sp. JdFR-58	DOE Joint Genome Institute (JGI)											908200	1123	no
3300003153	Ga0052192	Marine microbial communities from deep-sea hydrothermal vent plumes in the Guaymas Basin	Marine microbial communities from deep-sea hydrothermal vent plumes in the Guaymas Basin	University of Michigan				454		Guaymas Basin, Gulf of mexico	Guaymas Basin, Gulf of California, Mexico			2004/1/1	132350460	337654	no
2728369449	Ga0180882	Deep subsurface and oceanic microbial communities from Witwatersrand Basin, South Africa, and the Canadian and Fennoscandian shields and at the Lost City Hydrothermal Field	Anaerolineales bacterium JdFR-64	DOE Joint Genome Institute (JGI)											2358376	2666	no
3300001680	Ga0012543	Black smokers hydrothermal plume microbial communities from Kilo Moana, Pacific Ocean	Black smokers hydrothermal plume microbial communities from Kilo Moana, Pacific Ocean	University of Michigan				Illumina HiSeq 2000	2600	Kilo Moana, Lau Basin, Pacific Ocean	Kilo Moana, Lau Basin, Pacific Ocean	-20.0541	-176.134		317764985	406469	no
2836500024	Ga0400623	Hydrothermal Fe-rich Mat Reference Genomes	Unclassified Zetaproteobacteria bacterium S7_FULL_No.13_0.9_8	University of Delaware											374236	492	no
2616644910	Ga0072716	Hydrothermal vent microbial communities from Crab Spa hydrothermal vent, East Pacific Rise	Thioreductor sp. SCGC AD-702-O18 (contamination screened)	Bigelow Laboratory Single Cell Genomics Center (SCGC)				Illumina		Pacific Ocean: East Pacific Rise, Crab Spa		9.83997	-104.294		812980	928	no
2772191018	Ga0262983	Hydrothermal Fe-rich Mat Reference Genomes	Unclassified Zetaproteobacteria bacterium S6_FULL_No.22_0.9_91	University of Delaware											1882688	2098	no
2893486174	Ga0454293	Hydrothermal Fe-rich Mat Reference Genomes	Unclassified Deltaproteobacteria bacterium S19_FULL_No.1_6.2_93	University of Delaware											2080709	1978	no
3300026484	Ga0256837	Marine microbial communities from hydrothermal vents in the Atlantic and Pacific Ocean	Hydrothermal vent microbial communities from Guaymas Basin, Mexico - 4561-384	DOE Joint Genome Institute (JGI)		SAMN09094697	SRX4801603	Illumina HiSeq 2500-1TB	2012	Mexico: Guaymas Basin	Biofilm on thermocouple array	27.0078	-111.407	2009/11/17	263515736	461653	yes
3300010434	Ga0137515	Diffuse hydrothermal flow volcanic vent microbial communities from Axial Seamount, northeast Pacific Ocean	Diffuse hydrothermal flow volcanic vent microbial communities from Axial Seamount, northeast Pacific ocean - Sample LVWS5_55_TP1_13L	Marine Biological Laboratory				Illumina HiSeq 1000	1542	Northeast Pacific Ocean: Anemone vent, Axial Seamount	Anemone diffuse flow vent, Axial Seamount	45.933	-130.014	2014/8	460782	1289	no
3300002579	Ga0032368	Ridgeia piscesae microbial communities from Northeast Pacific Ocean hydrothermal vents	Host-associated microbial community of the tubeworm Ridgeia piscesae from hydrothermal vents Sample -index 13 (Hulk HF)	Canada's Michael Smith Genome Sciences Centre				Illumina HiSeq 2500, Illumina HiSeq 2000	2190	Pacific Ocean	Main endeavour field Hulk	47.95	-129.084	2010/1/1	347780790	783736	no
2504643006	Ga0025040	A Genomic Encyclopedia of Bacteria and Archaea (GEBA)	Marinithermus hydrothermalis T1, DSM 14884	DOE Joint Genome Institute (JGI)		SAMN00713602		454 GS FLX Titanium, Illumina	1385	Suiyo Seamount in the Izu-Bonin Arc, Japan	deep-sea hydrothermal vent chimney sample collected from the Suiyo Seamount in the Izu-Bonin Arc, Japan, at a depth of 1,385 m	28.65	140.82		2269167	2310	no
3300039233	Ga0434946	Diffuse flow microbial communities from hydrothermal vent near Loihi Seamount, Hawaii, USA	Diffuse flow microbial communities from hydrothermal vent near Loihi Seamount, Hawaii, USA - 29	The Marine Biological Laboratory				Illumina NextSeq	1000.000000 to 1200.000000	USA: Loihi Seamount, Hawaii	Diffuse flow from hydrothermal vent	18.92	-155.27	2018/8	136720305	202806	yes
3300025758	Ga0209411	Bacterial and archaeal communities from various locations to study Microbial Dark Matter (Phase II)	Marine hydrothermal vent microbial communities from Guaymas Basin, Gulf of California to study Microbial Dark Matter (Phase II) - Marker 14 Mat core 4571-4 33-36 cm metaG (SPAdes) (version 3)	DOE Joint Genome Institute (JGI)		SAMN06266163	SRX2525220	Illumina HiSeq 2500-1TB	2000	Mexico: Guaymas Basin, Gulf of California	marine hydrothermal sediment	27.0078	-111.407	2009/12/2	14148566	34631	no
2728369451	Ga0180881	Deep subsurface and oceanic microbial communities from Witwatersrand Basin, South Africa, and the Canadian and Fennoscandian shields and at the Lost City Hydrothermal Field	Anaerolineales bacterium JdFR-61	DOE Joint Genome Institute (JGI)											2906759	2885	no
3300039138	Ga0243150	Sediment and seawater microbial communities from hydrothermal vent in Taiwan, China	Seawater microbial communities from hydrothermal vent in Taiwan, China - Y2	Xiamen University		SAMN06199456	SRX2538517	Illumina HiSeq 2500	5	China: Taiwan	coastal water body	24.835	121.962	2015/5/26	61979914	107216	no
2616644863	Ga0072655	Hydrothermal vent microbial communities from Crab Spa hydrothermal vent, East Pacific Rise	Sulfurovum sp. SCGC AC-213-A03 (contamination screened)	Bigelow Laboratory Single Cell Genomics Center (SCGC)				Illumina		Pacific Ocean: East Pacific Rise, Crab Spa		9.83997	-104.294		430374	454	no
3300019379	Ga0197325	Microbial community analysis of hydrothermal vent diffuse flow samples from Mid-Cayman Rise, Pacific Ocean	Microbial community analysis of hydrothermal vent diffuse flow samples from Mid-Cayman Rise, Pacific Ocean - FS842 IDBA reassembly renamed	Marine Biological Laboratory				Illumina MiSeq	2388	Mid-Cayman Rise, Pacific Ocean	Ravelin #2 hydrothermal vent FS842	18.3752	-81.7971	2012/1/17	23046372	29272	no
2836572527	Ga0400681	Hydrothermal Fe-rich Mat Reference Genomes	Unclassified Zetaproteobacteria bacterium 483-BS63_FULL_No.1_19.6_91	Western Washington University											2525695	2988	no
3006935409	Ga0175738	Genome sequencing of cellulolytic heat tolerant Bacillus isolates from Yellowstone National Park hydrothermal-vegetative environments	Bacillus licheniformis YNP1-TSU	Tennessee State University		SAMN05559629	SRX2018998	Illumina HiSeq 3000	0.04	USA: Yellowstone National Park, WY	heated water in contact with grass/sediment layer	44.78	-110.69		4275585	4632	no
3300028899	Ga0310044	Axial Seamount Reassemblies	Marine deep subsurface microbial communities from hydrothermal vents in Axial Seamount, Pacific Ocean - FS896_ElGuapo_DNA IDBA_UD reassembly	The Marine Biological Laboratory		SAMEA3143269	ERX639124, ERX639121, ERX639129, ERX639131, ERX639118, ERX639109, ERX639126, ERX639112, ERX639127, ERX639111, ERX639115, ERX639120, ERX639114, ERX639113, ERX639132, ERX639130, ERX639119, ERX639122, ERX639128, ERX639117, ERX639123, ERX639107, ERX639110, ERX639125, ERX639108, ERX639116	Illumina HiSeq 1000		Pacific Ocean: Axial Seamount	Low temperature diffuse fluid vents	45.9266	-129.979	2013	525803588	1194562	no
3300010924	Ga0137528	Diffuse hydrothermal flow volcanic vent microbial communities from Axial Seamount, northeast Pacific Ocean	Diffuse hydrothermal flow volcanic vent microbial communities from Axial Seamount, northeast Pacific ocean - Sample LVWS6_55_TP1_13H	Marine Biological Laboratory				Illumina HiSeq 1000	1516	Marker 33, Axial Seamount, Northeast Pacific Ocean	Marker 33 diffuse flow vent, Axial Seamount	45.9332	-129.982	2014/8	4193925	9099	no
2728369323	Ga0180880	Deep subsurface and oceanic microbial communities from Witwatersrand Basin, South Africa, and the Canadian and Fennoscandian shields and at the Lost City Hydrothermal Field	Candidatus Bathyarchaeota archaeon JdFR-11	DOE Joint Genome Institute (JGI)											1725730	1899	no
2728369439	Ga0180862	Deep subsurface and oceanic microbial communities from Witwatersrand Basin, South Africa, and the Canadian and Fennoscandian shields and at the Lost City Hydrothermal Field	Nitrospirae bacterium JdFR-87	DOE Joint Genome Institute (JGI)											1861077	2015	no
3300038503	Ga0428964	Diffuse flow microbial communities from hydrothermal vent near Loihi Seamount, Hawaii, USA	Diffuse flow microbial communities from Kilauea ocean entry site, Hawaii, USA - 119	The Marine Biological Laboratory				Illumina NextSeq	600.000000 to 650.000000	USA: Kilauea Volcano, Hawaii	Diffuse flow from lavas at Kilauea ocean entry site	19.42	-155.28	2018/8	117432672	153305	no
2728369309	Ga0180905	Deep subsurface and oceanic microbial communities from Witwatersrand Basin, South Africa, and the Canadian and Fennoscandian shields and at the Lost City Hydrothermal Field	Archaeoglobus sp. JdFR-35	DOE Joint Genome Institute (JGI)											1703394	1970	no
2617270855	Ga0073578	Genome sequencing of Thermotogales isolates from hydrothermal vents	Thermosipho affectus 1070	Norwegian Sequencing Centre (NSC)		SAMN02444753		PacBio RS		Environmental Aquatic Marine hydrothermal vents	Atlantic ocean, Menez Gwen Hydrothermal vents field	37.8417	-31.525		1781851	1826	no
2772191004	Ga0262969	Hydrothermal Fe-rich Mat Reference Genomes	Unclassified Zetaproteobacteria bacterium S6_FULL_No.2_5.1_96	University of Delaware											2034476	2123	no
2616644885	Ga0072691	Hydrothermal vent microbial communities from Crab Spa hydrothermal vent, East Pacific Rise	Sulfurimonas sp. SCGC AD-684-O18 (contamination screened)	Bigelow Laboratory Single Cell Genomics Center (SCGC)				Illumina		Pacific Ocean: East Pacific Rise, Crab Spa		9.83997	-104.294		1506914	1530	no
2836468885	Ga0400594	Hydrothermal Fe-rich Mat Reference Genomes	Unclassified Zetaproteobacteria bacterium 667-BS4_FULL_No.5_4.2_48	University of Delaware											1731637	2010	no
2836493320	Ga0400615	Hydrothermal Fe-rich Mat Reference Genomes	Unclassified Zetaproteobacteria bacterium S7_FULL_No.5_3.6_34	University of Delaware											855073	1035	no
3300002588	Ga0041813	Diffuse hydrothermal flow volcanic vent microbial communities from Axial Seamount, northeast Pacific Ocean	Diffuse hydrothermal flow volcanic vent microbial communities from Axial Seamount, northeast Pacific ocean - Sample FS903_30_12L	The Marine Biological Laboratory					1522	Marker 113, Axial Seamount, Northeast Pacific Ocean	Marker 113, Axial Seamount, Northeast Pacific Ocean	45.9227	-129.988		1855290	4608	no
2615840622	Ga0071115	Deep subsurface and oceanic microbial communities from Witwatersrand Basin, South Africa, and the Canadian and Fennoscandian shields and at the Lost City Hydrothermal Field	Candidatus Desulfopertinax cowenii modA32	DOE Joint Genome Institute (JGI)											1778734	1842	no
2616644880	Ga0072686	Hydrothermal vent microbial communities from Crab Spa hydrothermal vent, East Pacific Rise	Alpha proteobacterium SCGC AD-682-O19 (contamination screened)	Bigelow Laboratory Single Cell Genomics Center (SCGC)				Illumina		Pacific Ocean: East Pacific Rise, Crab Spa		9.83997	-104.294		109007	108	no
3300042029	Ga0451313	Mollusc gills microbial communities from various hydrothermal vent in Atlantic Ocean	Mollusc gills microbial communities from Lilliput hydrothermal vent, Atlantic Ocean - BspSym_Li_2_10-4	Max Planck Institute for Marine Microbiology		SAMEA5664330	ERX3367179	Illumina HiSeq 2500	1494	South Atlantic Ocean	mollusc gills	-9.54817	-13.2088	2009/4/29	401600648	451621	no
2523533539	Ga0002810	Genomic Encyclopedia of Type Strains, Phase I: the one thousand microbial genomes (KMG-I) project	Desulfovibrio hydrothermalis AM13, DSM 14728	DOE Joint Genome Institute (JGI)		SAMN02440858	SRX1879426	Illumina HiSeq 2500	2600	East-Pacific Rise	Deep-sea hydrothermal chimney wall	-20.0001	-115		3659215	3308	no
3300042713	Ga0454355	Microbial symbiotic communities from bathmodiolin mussel gills	Mollusc gills microbial communities from Lucky Strike-Eifeltower hydrothermal vent, Atlantic Ocean - BazoSym_LS-ET_5_1048J Re-assembly	Max Planck Institute for Marine Microbiology		SAMEA5664340	ERX3367189	Illumina HiSeq 2500	1689	North Atlantic Ocean	mollusc gills	37.2829	-32.2756	2013/8/17	7451933	11422	no
3300003178	Ga0055412	Black smoker hydrothermal chimney microbial communities from Manus Basin, Bismarck Sea	373C	Max Planck Institute for Marine Microbiology				Illumina MiSeq	1680	Deep-Sea, Bismarck Sea, Papua New Guinea	Roman Ruins hydrothermal vent field, Deep-Sea, Bismarck Sea, Papua New Guinea,	-3.72119	151.675		96159472	183758	no
2836461437	Ga0400584	Hydrothermal Fe-rich Mat Reference Genomes	Unclassified Zetaproteobacteria bacterium 665-MMA12_FULL_No.4_3.6_1	University of Delaware											78087	96	no
2728369318	Ga0180888	Deep subsurface and oceanic microbial communities from Witwatersrand Basin, South Africa, and the Canadian and Fennoscandian shields and at the Lost City Hydrothermal Field	Methanomicrobia archaeon JdFR-19	DOE Joint Genome Institute (JGI)											1288683	1595	no
2728369444	Ga0180853	Deep subsurface and oceanic microbial communities from Witwatersrand Basin, South Africa, and the Canadian and Fennoscandian shields and at the Lost City Hydrothermal Field	Deferribacteres bacterium JdFR-76	DOE Joint Genome Institute (JGI)											3099908	2945	no
3300003539	Ga0060333	Diffuse hydrothermal flow volcanic vent microbial communities from Axial Seamount, northeast Pacific Ocean	Diffuse hydrothermal flow volcanic vent microbial communities from Axial Seamount, northeast Pacific ocean - Sample FS891_Anemone_DNA	The Marine Biological Laboratory				Illumina	1542	North Pacific Ocean: Axial Seamount	Anemone diffuse flow vent, Axial seamount	45.9332	-130.014		378883382	883442	no
3300028400	Ga0256832	Marine microbial communities from hydrothermal vents in the Atlantic and Pacific Ocean	Hydrothermal vent microbial communities from Lau Basin, Pacific Ocean - 134-614	DOE Joint Genome Institute (JGI)		SAMN10350718	SRX5246485	Illumina HiSeq 2500-1TB	1894	Pacific Ocean: Lau Basin	Hydrothermal sulfide rock	-21.9879	-176.568	2005/4/28	762786935	1402025	yes
3300003948	Ga0064031	Diffuse hydrothermal flow volcanic vent microbial communities from Axial Seamount, northeast Pacific Ocean	Diffuse hydrothermal flow volcanic vent microbial communities from Axial Seamount, northeast Pacific ocean - Sample FS907_80_12L9	Marine Biological Laboratory				Illumina HiSeq 1000	1542	Northeast Pacific Ocean: Anemone vent, Axial Seamount	Anemone diffuse flow vent, Axial seamount	45.933	-130.014		1078867	2888	no
3300007301	Ga0079920	Hydrothermal vent microbial communities from Teddy Bear hydrothermal vent, East Pacific Rise	Hydrothermal vent microbial communities from Teddy Bear hydrothermal vent, East Pacific Rise - large volume pump, sample 5	Bigelow Laboratory Single Cell Genomics Center (SCGC)						Teddy Bear Hydrothermal Vent, East Pacific Rise	Teddy Bear Hydrothermal Vent	9.84722	-104.297	2014/1/11	249394076	681701	no
3300023307	Ga0256749	Hydrothermal Fe-rich Mat Reference Genomes	Hydrothermal Fe-rich mat microbial community from Urashima Vent Field, Mariana Arc, Pacific Ocean - 801-SC8	University of Delaware				Illumina HiSeq 2500	2927.7	International: Urashima Vent Field, Mariana Arc	Golden Horn Chimney	12.9223	143.649	2014/12/17	20042752	40295	no
2836495134	Ga0400617	Hydrothermal Fe-rich Mat Reference Genomes	Unclassified Zetaproteobacteria bacterium S7_FULL_No.7_2.2_38	University of Delaware											876564	1002	no
3300028894	Ga0310049	Axial Seamount Reassemblies	Diffuse hydrothermal flow volcanic vent microbial communities from Axial Seamount, northeast Pacific ocean - Sample FS906_Marker113_DNA IDBA_UD reassembly	Marine Biological Laboratory				Illumina HiSeq 1000	1522	North Pacific Ocean: Axial Seamount	Marker 113 diffuse flow vent, Axial Seamount	45.9227	-129.988	2014/8	220336933	482588	no
2836496137	Ga0400618	Hydrothermal Fe-rich Mat Reference Genomes	Unclassified Zetaproteobacteria bacterium S7_FULL_No.8_2.1_21	University of Delaware											569814	704	no
2836562568	Ga0400676	Hydrothermal Fe-rich Mat Reference Genomes	Unclassified Zetaproteobacteria bacterium 482-BS8_FULL_No.8_0.7_96	Western Washington University											2262884	2507	no
3300039105	Ga0188685	Serpentinized rock microbial communities from various locations	Hydrothermal vent fluid microbial communities from New Bay of Prony, New Caledonia - Prony27	Marine Biological Laboratory		SAMN03154341	SRX748869	Illumina HiSeq 1000	43	New Caledonia: Bay of Prony	Hydrothermal vent fluid	-22.3609	166.88	2005/6/14	19099879	46684	no
3300009486	Ga0119762	Microbial community analysis of hydrothermal vent diffuse flow samples from Mid-Cayman Rise, Pacific Ocean	Microbial community analysis of hydrothermal vent diffuse flow samples from Mid-Cayman Rise, Pacific Ocean - FS856 no min length	Marine Biological Laboratory						Mid-Cayman Rise	diffuse flow hydrothermal vent fluids			2012	237391350	907829	no
3300010898	Ga0137510	Diffuse hydrothermal flow volcanic vent microbial communities from Axial Seamount, northeast Pacific Ocean	Diffuse hydrothermal flow volcanic vent microbial communities from Axial Seamount, northeast Pacific ocean - Sample FS906_80_TP1_12H	Marine Biological Laboratory				Illumina HiSeq 1000	1522	Marker 113, Axial Seamount, Northeast Pacific Ocean	Marker 113 diffuse flow vent, Axial Seamount	45.9227	-129.988	2014/8	523868	1818	no
3300010922	Ga0137761	Diffuse hydrothermal flow volcanic vent microbial communities from Axial Seamount, northeast Pacific Ocean	Diffuse hydrothermal flow volcanic vent microbial communities from Axial Seamount, northeast Pacific ocean - Sample FS917_55_12C_TP1_9	Marine Biological Laboratory				Illumina HiSeq 1000	1516	Marker 33, Axial Seamount, Northeast Pacific Ocean	Marker 33 diffuse flow vent, Axial Seamount	45.9332	-129.982	2015/8	4183638	8358	yes
2836560894	Ga0400675	Hydrothermal Fe-rich Mat Reference Genomes	Unclassified Zetaproteobacteria bacterium 482-BS8_FULL_No.7_1.2_59	Western Washington University											1544273	1673	no
2517572008	Ga0026685	Shedding Light on the Dark: Single-cell Genomics of Uncultivated Epsilonproteobacteria Inhabiting the Subseafloor Biosphere at Deep-Sea Hydrothermal Vents	Sulfurovum sp. SCGC AAA036-O23 (unscreened)	DOE Joint Genome Institute (JGI)		SAMN05660969									639385	513	no
3300007777	Ga0105711	Diffuse hydrothermal flow volcanic vent microbial communities from Axial Seamount, northeast Pacific Ocean	Diffuse hydrothermal flow volcanic vent microbial communities from Axial Seamount, northeast Pacific ocean - Sample FS918_NRZ_DNA CLC_assembly	Marine Biological Laboratory				Illumina NextSeq	1716	North Rift Zone, Axial Seamount, northeast Pacific Ocean	North Rift Zone, Axial Seamount, northeast Pacific Ocean	46.0747	-129.995	2015/8/26	425714829	775163	no
2836404817	Ga0400542	Hydrothermal Fe-rich Mat Reference Genomes	Unclassified Zetaproteobacteria bacterium S19_FULL_No.8_0.8_37	University of Delaware											951721	1047	no
2728369327	Ga0180933	Deep subsurface and oceanic microbial communities from Witwatersrand Basin, South Africa, and the Canadian and Fennoscandian shields and at the Lost City Hydrothermal Field	Archaeoglobus sp. JdFR-27	DOE Joint Genome Institute (JGI)											2360045	2634	no
3300028825	Ga0310053	Axial Seamount Reassemblies	Diffuse hydrothermal flow volcanic vent microbial communities from Axial Seamount, northeast Pacific ocean - Sample FS914_Anemone_DNA IDBA_UD reassembly	Marine Biological Laboratory				Illumina NextSeq	1541	Northeast Pacific Ocean: Anemone vent, Axial Seamount	Anemone Vent, Axial Seamount, northeast Pacific Ocean	45.9332	-130.014	2015/8/24	408956639	911799	no
3300002769	Ga0047378	Diffuse hydrothermal flow volcanic vent microbial communities from Axial Seamount, northeast Pacific Ocean	Diffuse hydrothermal flow volcanic vent microbial communities from Axial Seamount, northeast Pacific ocean - Sample LVWS1_TP2_13L					Illumina	1522	Marker 113, Axial Seamount, Northeast Pacific Ocean	Marker 113 diffuse flow vent, Axial Seamount	45.9227	-129.988		1019616	3621	no
3300003542	Ga0061010	Diffuse hydrothermal flow volcanic vent microbial communities from Axial Seamount, northeast Pacific Ocean	Diffuse hydrothermal flow volcanic vent microbial communities from Axial Seamount, northeast Pacific ocean - Sample FS900_Dependable_DNA					Illumina	1917	North Pacific Ocean: Axial Seamount	Dependable diffuse flow vent, Axial seamount	45.8799	-129.803		726296071	1704614	no
3300039273	Ga0438747	Tubeworm-associated microbial communities from Endeavour hydrothermal vents, Juan de Fuca Ridge, Canada	Tubeworm-associated microbial communities from Endeavour hydrothermal vents, Juan de Fuca Ridge, Canada - high-flow bush EMw7	Dalhousie University				Illumina NextSeq 550	2185	Juan de Fuca Ridge, NE Pacific	Base of tubeworm bush	47.9497	-129.098	2016/8	612144589	1129354	no
3300013779	Ga0180406	Microbial community analysis of hydrothermal vent diffuse flow samples from Mid-Cayman Rise, Pacific Ocean	Microbial community analysis of hydrothermal vent diffuse flow samples from Mid-Cayman Rise, Pacific Ocean - FS849 IDBA reassembly	Marine Biological Laboratory				Illumina HiSeq	2297	Mid-Cayman Rise	FS841 Mid-Cayman Rise diffuse flow	18.3767	-81.7981	2012/1/19	5699510	7739	no
2841165597	Ga0335560	Pseudothauera hydrothermalis GD-2 genome sequencing	Pseudothauera hydrothermalis GD-2	Chinese Academy of Science, Institute of Microbiology		SAMN09080914		PacBio RS		China	hot spring				3059321	2951	no
3300028836	Ga0310043	Axial Seamount Reassemblies	Diffuse hydrothermal flow volcanic vent microbial communities from Axial Seamount, northeast Pacific ocean - Sample FS891_Anemone_DNA IDBA_reassembly	The Marine Biological Laboratory				Illumina	1542	North Pacific Ocean: Axial Seamount	Anemone diffuse flow vent, Axial seamount	45.9332	-130.014		347950772	807213	yes
3300010916	Ga0137529	Diffuse hydrothermal flow volcanic vent microbial communities from Axial Seamount, northeast Pacific Ocean	Diffuse hydrothermal flow volcanic vent microbial communities from Axial Seamount, northeast Pacific ocean - Sample LVWS6_55_TP1_13L	Marine Biological Laboratory				Illumina HiSeq 1000	1516	Marker 33, Axial Seamount, Northeast Pacific Ocean	Marker 33 diffuse flow vent, Axial Seamount	45.9332	-129.982	2014/8	1652681	5069	no
3300066848	Ga0496656	Hydrothermal vents viral and microbial communities from various locations in Pacific Ocean	Hydrothermal vent plume microbial communities from Gulf of California, Mexico - CTD-FK190211-21-100m-0.65	DOE Joint Genome Institute (JGI)				Illumina NovaSeq S4	100	Mexico: Gulf of California	Pelagic ocean, hydrothermal vent plume	27.5854	-111.463	2019/3/7	117290339	214519	no
2721755668	Ga0175042	Maribacter hydrothermalis T28 Genome sequencing	Maribacter hydrothermalis T28	Xiamen University		SAMN04633439		PacBio RS II		Taiwan: Kueishan Island	seawater from shallow-sea hydrothermal system	24	121		4271158	3761	no
2728369442	Ga0180851	Deep subsurface and oceanic microbial communities from Witwatersrand Basin, South Africa, and the Canadian and Fennoscandian shields and at the Lost City Hydrothermal Field	Anaerolineales bacterium JdFR-62	DOE Joint Genome Institute (JGI)											906207	1047	no
3300005095	Ga0072504	Hydrothermal chimney in EPR	Hydrothermal chimney microbial communities from the East Pacific Rise - L vent 8	Beijing Genomics Institute (BGI)						East Pacific Rise	East Pacific Rise				420551688	473176	yes
2061766003	Ga0010754	Hydrothermal vent microbial communities from Guaymas and Carmen Basins, Gulf of California	Hydrothermal vent microbial communities from Guaymas and Carmen Basins, Gulf of California, Sample 457	Pennsylvania State University					1996	Gulf of California	Guaymas Basin, Gulf of California	27.506	-111.347	2008/7/1	136121595	322198	no
2836548019	Ga0400653	Hydrothermal Fe-rich Mat Reference Genomes	Unclassified Zetaproteobacteria bacterium 481-BS4_FULL_No.9_0.9_68	Western Washington University											1708263	1893	no
2836464167	Ga0400589	Hydrothermal Fe-rich Mat Reference Genomes	Unclassified Zetaproteobacteria bacterium 667-BS4_FULL_No.1_8.6_97	University of Delaware											1937488	1956	no
3300010911	Ga0137772	Diffuse hydrothermal flow volcanic vent microbial communities from Axial Seamount, northeast Pacific Ocean	Diffuse hydrothermal flow volcanic vent microbial communities from Axial Seamount, northeast Pacific ocean - Sample FS917_55_13C_TP1_INC4_7	Marine Biological Laboratory				Illumina HiSeq 1000	1516	Marker 33, Axial Seamount, Northeast Pacific Ocean	Marker 33 diffuse flow vent, Axial Seamount	45.9332	-129.982	2015/8	1817767	3728	no
2630968206	Ga0078063	Single Amplified Genomes from Iheya North hydrothermal field in the Okinawa Trough	Dehalococcoidales sp. SCGC AB-790-I04 (contamination screened)	Bigelow Laboratory Single Cell Genomics Center (SCGC)				Illumina		Pacific Ocean	Okinawa Trough				187486	216	no
3300037333	Ga0256825	Marine microbial communities from hydrothermal vents in the Atlantic and Pacific Ocean	Hydrothermal vent microbial communities from East Pacific Rise, Pacific Ocean - CV74	DOE Joint Genome Institute (JGI)		SAMN15738834	SRX9088356	Illumina NovaSeq S4	2503	Pacific Ocean: East Pacific Rise	Experimental microbial colonizer placed at the East Pacific Rise	9.8416	-104.292	2014/1/18	257383960	407161	yes
3300002572	Ga0032370	Ridgeia piscesae microbial communities from Northeast Pacific Ocean hydrothermal vents	Host-associated microbial community of the tubeworm Ridgeia piscesae from hydrothermal vents Sample -index 15 (Hulk LF)	Canada's Michael Smith Genome Sciences Centre				Illumina HiSeq 2500, Illumina HiSeq 2000	2191	Pacific Ocean	Main endeavour ridge Hulk	47.95	-129.084	2010/1/1	259174647	662224	no
3300003978	Ga0063038	Diffuse hydrothermal vent microbial communities from Menez Gwen hydrothermal field, Mid Atlantic ridge	Diffuse hydrothermal vent microbial communities from Menez Gwen hydrothermal field, Mid Atlantic ridge - MGW_C	Max Planck Institute for Plant Breeding Research						Mid-Atlantic Ridge	near diffuse venting site				80402791	94295	no
3300008560	Ga0103606	Microbial communities from hydrothermal vents in Mid Cayman Rise, Atlantic Ocean	Microbial communities from hydrothermal vents in Mid Cayman Rise, Atlantic Ocean - CTD-06-48	University of Michigan		SAMN03609697	SRX1043695	Illumina HiSeq 2500		Atlantic Ocean	Atlantic Ocean,Mid Cayman Rise			2012/1	8053366	32653	no
2836411087	Ga0400546	Hydrothermal Fe-rich Mat Reference Genomes	Unclassified Zetaproteobacteria bacterium S19_FULL_No.11_0.6_46	University of Delaware											744003	901	no
3300042717	Ga0454361	Microbial symbiotic communities from bathmodiolin mussel gills	Mollusc gills microbial communities from Semeiov-Ash lighthouse hydrothermal vent, Atlantic Ocean - BputSym_Se-AL_3_1115C Re-assembly	Max Planck Institute for Marine Microbiology		SAMEA5664337	ERX3367186		2432	North Atlantic Ocean	mollusc gills	13.5135	-44.9631	2014/11/22	26270040	29768	no
3300042714	Ga0454354	Microbial symbiotic communities from bathmodiolin mussel gills	Mollusc gills microbial communities from Lucky Strike-Eifeltower hydrothermal vent, Atlantic Ocean - BazoSym_LS-ET_4_1048I Re-assembly	Max Planck Institute for Marine Microbiology		SAMEA5664341	ERX3367190	Illumina HiSeq 2500	1689	North Atlantic Ocean	mollusc gills	37.2829	-32.2756	2013/8/17	6947285	10718	no
3300028838	Ga0310052	Axial Seamount Reassemblies	Diffuse hydrothermal flow volcanic vent microbial communities from Axial Seamount, northeast Pacific ocean - Sample FS917_Marker33_DNA IDBA_UD reassembly	Marine Biological Laboratory				Illumina NextSeq	1518	Marker33 Vent, Axial Seamount, northeast Pacific Ocean	Marker33 Vent, Axial Seamount, northeast Pacific Ocean	45.9332	-129.982	2015/8/26	446641352	1045323	yes
3300010918	Ga0137521	Diffuse hydrothermal flow volcanic vent microbial communities from Axial Seamount, northeast Pacific Ocean	Diffuse hydrothermal flow volcanic vent microbial communities from Axial Seamount, northeast Pacific ocean - Sample LVWS6_30_TP1_12L	Marine Biological Laboratory				Illumina HiSeq 1000	1516	Marker 33, Axial Seamount, Northeast Pacific Ocean	Marker 33 diffuse flow vent, Axial Seamount	45.9332	-129.982	2014/8	2715587	6171	yes
2802429299	Ga0258214	Halomonas hydrothermalis Y2 genome sequencing	Halomonas hydrothermalis Y2	Shandong University		SAMN07609045		Illumina HiSeq		China: Shandong Province		36.4	117		3933432	3659	no
3300021591	Ga0190338	Microbial communities from sediments and microbial mats in various locations	Hydrothermal vent sediment bacterial communities from Southern Trench, Guaymas Basin, Mexico - 4872-04-11-12_MG	DOE Joint Genome Institute (JGI)		SAMN08777528	SRX3982282	Illumina HiSeq 2500-1TB	2011	Mexico: Guaymas Basin	Cathedral Hill gradient site, bare sediment just outside mat	27.0114	-110.596	2016/12/24	129332765	319226	yes
2728369443	Ga0180850	Deep subsurface and oceanic microbial communities from Witwatersrand Basin, South Africa, and the Canadian and Fennoscandian shields and at the Lost City Hydrothermal Field	Anaerolineales bacterium JdFR-60	DOE Joint Genome Institute (JGI)											863183	995	no
2836476808	Ga0400599	Hydrothermal Fe-rich Mat Reference Genomes	Unclassified Zetaproteobacteria bacterium 667-BS4_FULL_No.10_2.5_38	University of Delaware											1017816	1164	no
2836565076	Ga0400677	Hydrothermal Fe-rich Mat Reference Genomes	Unclassified Zetaproteobacteria bacterium 482-BS8_FULL_No.9_0.6_92	Western Washington University											1852292	2146	no
3300013798	Ga0180410	Microbial community analysis of hydrothermal vent diffuse flow samples from Mid-Cayman Rise, Pacific Ocean	Microbial community analysis of hydrothermal vent diffuse flow samples from Mid-Cayman Rise, Pacific Ocean - FS866 IDBA reassembly	Marine Biological Laboratory					2293	Mid-Cayman Rise	Mid-Cayman Rise diffuse flow	18.37	-81.798	2013/6/21	135030515	283861	yes
2630968208	Ga0078065	Single Amplified Genomes from Iheya North hydrothermal field in the Okinawa Trough	Anaerolineales sp. SCGS AB-790-K11 (contamination screened)	Bigelow Laboratory Single Cell Genomics Center (SCGC)				Illumina		Pacific Ocean	Okinawa Trough				493899	473	no
3300002573	Ga0032367	Ridgeia piscesae microbial communities from Northeast Pacific Ocean hydrothermal vents	Host-associated microbial community of the tubeworm Ridgeia piscesae from hydrothermal vents Sample -index 12 (Axial HF)	Canada's Michael Smith Genome Sciences Centre				Illumina HiSeq 2000, Illumina HiSeq 2500	1516.6	Axial Volcano (Hotspot 2)	Main endeavour ridge Hulk	47.9334	-129.967	2010/1/1	271895075	677751	no
2616644869	Ga0072661	Hydrothermal vent microbial communities from Crab Spa hydrothermal vent, East Pacific Rise	SCGC AC-213-N20 (unscreened)	Bigelow Laboratory Single Cell Genomics Center (SCGC)				Illumina		Pacific Ocean: East Pacific Rise, Crab Spa		9.83997	-104.294		1080196	1000	no
2836457517	Ga0400582	Hydrothermal Fe-rich Mat Reference Genomes	Unclassified Zetaproteobacteria bacterium 665-MMA12_FULL_No.2_6.1_95	University of Delaware											1979094	2089	no
3300010923	Ga0137715	Diffuse hydrothermal flow volcanic vent microbial communities from Axial Seamount, northeast Pacific Ocean	Diffuse hydrothermal flow volcanic vent microbial communities from Axial Seamount, northeast Pacific ocean - Sample FS917_55_12C_TP1_7	Marine Biological Laboratory				Illumina HiSeq 1000	1516	Marker 33, Axial Seamount, Northeast Pacific Ocean	Marker 33 diffuse flow vent, Axial Seamount	45.9332	-129.982	2015/8	4087758	8576	yes
3300010909	Ga0137514	Diffuse hydrothermal flow volcanic vent microbial communities from Axial Seamount, northeast Pacific Ocean	Diffuse hydrothermal flow volcanic vent microbial communities from Axial Seamount, northeast Pacific ocean - Sample LVWS5_55_TP1_13H	Marine Biological Laboratory				Illumina HiSeq 1000	1542	Northeast Pacific Ocean: Anemone vent, Axial Seamount	Anemone diffuse flow vent, Axial Seamount	45.933	-130.014	2014/8	1447887	3493	no
2836549913	Ga0400654	Hydrothermal Fe-rich Mat Reference Genomes	Unclassified Zetaproteobacteria bacterium 481-BS4_FULL_No.10_0.7_4	Western Washington University											340359	337	no
2836530202	Ga0400644	Hydrothermal Fe-rich Mat Reference Genomes	Unclassified Zetaproteobacteria bacterium 479-BS4_FULL_No.13_0.5_10	Western Washington University											358724	445	no
2728369324	Ga0180938	Deep subsurface and oceanic microbial communities from Witwatersrand Basin, South Africa, and the Canadian and Fennoscandian shields and at the Lost City Hydrothermal Field	Archaeoglobus sp. JdFR-36	DOE Joint Genome Institute (JGI)											581015	714	no
3300003543	Ga0061009	Diffuse hydrothermal flow volcanic vent microbial communities from Axial Seamount, northeast Pacific Ocean	Diffuse hydrothermal flow volcanic vent microbial communities from Axial Seamount, northeast Pacific ocean - Sample FS898_N3Area_DNA					Illumina	1530	North Pacific Ocean: Axial Seamount	N3 Area diffuse flow vent, Axial seamount	45.9437	-129.985		914957800	1940104	no
3300007645	Ga0104318	Microbial community analysis of hydrothermal vent diffuse flow samples from Mid-Cayman Rise, Pacific Ocean	Microbial community analysis of hydrothermal vent diffuse flow samples from Mid-Cayman Rise, Pacific Ocean - FS879	Marine Biological Laboratory						Mid Cayman Rise	Hot Cracks #2, Von Damm, Mid Cayman Rise	18.375	-81.797	2013/6/27	7504040	9815	no
3300008469	Ga0115369	Marine sediment microbial communities from shallow-sea hydrothermal vent, Milos, Greece	Marine sediment microbial communities from shallow-sea hydrothermal vent, Milos, Greece - WM1	National Aeronautics and Space Administration (NASA)				Illumina HiSeq	0.010000 to 0.200000	Milos, Greece	marine sediment	36.6749	24.5209	2014/5/24	722966813	1614206	no
3300050907	Ga0504783	Sorted cell/s from hydrothermal vent fluid, Lost City Hydrothermal field, North Atlantic Ocean	Sorted cell/s from hydrothermal vent fluid, Lost City Hydrothermal field, North Atlantic Ocean - AH-954-A13	DOE Joint Genome Institute (JGI)		SAMN49211292	SRX29505273	Illumina NovaSeq S4		North Atlantic Ocean	hydrothermal vent fluid	30.1194	-42.1248	2018/9/21	939085	1017	no
3300048641	Ga0496639	Hydrothermal vents viral and microbial communities from various locations in Pacific Ocean	Hydrothermal vent plume microbial communities from North Pacific Ocean - CTD-AT42-06-010-45m-0.65	DOE Joint Genome Institute (JGI)		SAMN51146553	SRX30607110	Illumina NovaSeq S4	2476	North Pacific Ocean	Pelagic ocean, hydrothermal vent plume	9.84014	-104.292	2018/12/13	520989850	867041	no
3300065504	Ga0496615	Hydrothermal vents viral and microbial communities from various locations in Pacific Ocean	Hydrothermal vent plume viral communities from North Pacific Ocean - CTD-AT42-06-009-32m-0.03-B v	DOE Joint Genome Institute (JGI)				Illumina NovaSeq S4	2473	North Pacific Ocean	Pelagic ocean, hydrothermal vent plume	9.83899	-104.291	2018/12/12	156539459	439324	no
2836497928	Ga0400621	Hydrothermal Fe-rich Mat Reference Genomes	Unclassified Zetaproteobacteria bacterium S7_FULL_No.11_1.8_41	University of Delaware											1200914	1443	no
3300010891	Ga0137525	Diffuse hydrothermal flow volcanic vent microbial communities from Axial Seamount, northeast Pacific Ocean	Diffuse hydrothermal flow volcanic vent microbial communities from Axial Seamount, northeast Pacific ocean - Sample LVWS6_30_TP2_13H	Marine Biological Laboratory				Illumina HiSeq 1000	1516	Marker 33, Axial Seamount, Northeast Pacific Ocean	Marker 33 diffuse flow vent, Axial Seamount	45.933	-129.982	2014/8	509926	1395	no
2836532032	Ga0400646	Hydrothermal Fe-rich Mat Reference Genomes	Unclassified Zetaproteobacteria bacterium 481-BS4_FULL_No.2_10.9_38	Western Washington University											1591869	1887	no
3300003702	Ga0062365	Hydrothermal vent plume microbial communities from the Mid Cayman Rise - Piccard2013-Plume	Hydrothermal vent plume microbial communities from the Mid Cayman Rise - Piccard2013-Plume - Microbial Assembly	University of Michigan				Illumina HiSeq 2000	5000	Mid-Cayman Rise, Caribbean Sea	Mixed hydrothermal plume and background waters	18.55	81.7167		447841055	486844	no
3300042712	Ga0454322	Microbial symbiotic communities from bathmodiolin mussel gills	Mollusc gills microbial communities from Clueless hydrothermal vent, Atlantic Ocean - BspSym_Cl_2_11-3 Re-assembly	Max Planck Institute for Marine Microbiology		SAMEA5664335	ERX3367184	Illumina HiSeq 2500	2972	South Atlantic Ocean	mollusc gills	-4.80327	-12.3718	2009/4/22	223122396	201819	no
2728369316	Ga0180852	Deep subsurface and oceanic microbial communities from Witwatersrand Basin, South Africa, and the Canadian and Fennoscandian shields and at the Lost City Hydrothermal Field	Crenarchaeota archaeon JdFR-12	DOE Joint Genome Institute (JGI)											301027	368	no
3300049901	Ga0496610	Hydrothermal vents viral and microbial communities from various locations in Pacific Ocean	Hydrothermal vent plume viral communities from Gulf of California, Mexico - CTD-FK190211-008-700m-0.03 v	DOE Joint Genome Institute (JGI)		SAMN51146756	SRX30589724	Illumina NovaSeq S4	700	Mexico: Gulf of California	Pelagic ocean, hydrothermal vent plume	27.5832	-111.465	2019/3/3	261795268	675004	no
3300039288	Ga0438754	Tubeworm-associated microbial communities from Endeavour hydrothermal vents, Juan de Fuca Ridge, Canada	Tubeworm-associated microbial communities from Endeavour hydrothermal vents, Juan de Fuca Ridge, Canada - high-flow bush EMw8	Dalhousie University				Illumina NextSeq 550	2180	Juan de Fuca Ridge, NE Pacific	Base of tubeworm bush	47.9495	-129.099	2016/8	647313843	1231567	no
3300003946	Ga0064036	Diffuse hydrothermal flow volcanic vent microbial communities from Axial Seamount, northeast Pacific Ocean	Diffuse hydrothermal flow volcanic vent microbial communities from Axial Seamount, northeast Pacific ocean - Sample FS908_80_12L10	Marine Biological Laboratory				Illumina HiSeq 1000	1516	Marker 33 diffuse flow vent, Axial Seamount	Marker 33 diffuse flow vent, Axial Seamount	45.9332	-129.982		813278	1922	no
2836485096	Ga0400608	Hydrothermal Fe-rich Mat Reference Genomes	Unclassified Zetaproteobacteria bacterium 667-BS4_FULL_No.18_1.0_17	University of Delaware											318376	375	no
2728369447	Ga0180856	Deep subsurface and oceanic microbial communities from Witwatersrand Basin, South Africa, and the Canadian and Fennoscandian shields and at the Lost City Hydrothermal Field	Candidatus Hydrothermae bacterium JdFR-74	DOE Joint Genome Institute (JGI)											1800622	1862	no
3300049899	Ga0496608	Hydrothermal vents viral and microbial communities from various locations in Pacific Ocean	Hydrothermal vent plume viral communities from Gulf of California, Mexico - CTD-FK190211-15-2002m-0.03 v	DOE Joint Genome Institute (JGI)		SAMN51146644	SRX30589755	Illumina NovaSeq S4	2002	Mexico: Gulf of California	Pelagic ocean, hydrothermal vent plume	27.0112	-111.405	2019/3/5	314993963	679125	no
3300049906	Ga0496598	Hydrothermal vents viral and microbial communities from various locations in Pacific Ocean	Hydrothermal vent plume viral communities from North Pacific Ocean - CTD010 v	DOE Joint Genome Institute (JGI)		SAMN51146559	SRX30589631	Illumina NovaSeq S4	2476	North Pacific Ocean	Pelagic ocean, hydrothermal vent plume	9.84014	-104.292	2018/12/13	38126505	78259	no
2728369311	Ga0180860	Deep subsurface and oceanic microbial communities from Witwatersrand Basin, South Africa, and the Canadian and Fennoscandian shields and at the Lost City Hydrothermal Field	Candidatus Geothermarchaeota archaeon JdFR-13	DOE Joint Genome Institute (JGI)											1671866	1764	no
3300007772	Ga0105672	Diffuse hydrothermal flow volcanic vent microbial communities from Axial Seamount, northeast Pacific Ocean	Diffuse hydrothermal flow volcanic vent microbial communities from Axial Seamount, northeast Pacific ocean - Sample FS914_Anemone_DNA CLC_assembly	Marine Biological Laboratory				Illumina NextSeq	1541	Northeast Pacific Ocean: Anemone vent, Axial Seamount	Anemone Vent, Axial Seamount, northeast Pacific Ocean	45.9332	-130.014	2015/8/24	352299040	642339	no
3300019450	Ga0193915	Microbial communities from sediments and microbial mats in various locations	Sorted cell/s from Southern Trench hydrothermal vent microbial mat, Guaymas Basin, Mexico - 6A_4862_10_02	DOE Joint Genome Institute (JGI)		SAMN08779203	SRX3974051	Illumina NextSeq-HO	1999	Mexico: Guaymas Basin	hydrothermal vent microbial mat 1 from Smoker "X", Site 2	27.001	-110.6	2016/12/13	13570208	14599	no
3300050929	Ga0504805	Sorted cell/s from hydrothermal vent fluid, Lost City Hydrothermal field, North Atlantic Ocean	Sorted cell/s from hydrothermal vent fluid, Lost City Hydrothermal field, North Atlantic Ocean - AH-954-K13	DOE Joint Genome Institute (JGI)		SAMN49208308	SRX29497758	Illumina NovaSeq S4		North Atlantic Ocean	hydrothermal vent fluid	30.1194	-42.1248	2018/9/21	1199095	1374	no
2728369322	Ga0180885	Deep subsurface and oceanic microbial communities from Witwatersrand Basin, South Africa, and the Canadian and Fennoscandian shields and at the Lost City Hydrothermal Field	Candidatus Hydrothermarchaeota archaeon JdFR-17	DOE Joint Genome Institute (JGI)											2178134	2771	no
2836405865	Ga0400544	Hydrothermal Fe-rich Mat Reference Genomes	Unclassified Zetaproteobacteria bacterium S19_FULL_No.9_0.7_72	University of Delaware											2107551	2514	no
3300010967	Ga0139247	Inactive Hydrothermal Chimney Metagenome Study	Microbial communities from the inside layer of the microbial mat covering an inactive hydrothermal chimney from the Kolumbo submarine volcano, Santorini, Greece - V16_c.in	Hellenic Centre for Marine Research (HCMR)				Illumina MiSeq		Kolumbo submarine Volcano, Hellenic Volcanic Arc, Aegean Sea, Greece	Hydrothermal chimney	36.52	25.48		181380085	307763	no
3300045763	Ga0495862	Deep sea sediment microbial communities from hydrothermal vent field on the Central Indian Ridge, Indian Ocean	Deep sea sediment microbial communities from hydrothermal vent field on the Central Indian Ridge, Indian Ocean - GTV1902	Chunlab				Illumina MiSeq	0.1	Indian Ocean: Central Indian Ridge	Deep sea Hydrothermal vent sediment	12.3711	66.076	2019/6/26	98695452	140000	no
3300005745	Ga0077123	Microbial community analysis of hydrothermal vent diffuse flow samples from Mid-Cayman Rise, Pacific Ocean	Microbial community analysis of hydrothermal vent diffuse flow samples from Mid-Cayman Rise, Pacific Ocean - FS844	Marine Biological Laboratory				Illumina MiSeq	2376	Mid-Cayman Rise	diffuse flow fluid	18.3747	-81.7973	2012/1/17	95261731	125075	no
2049941003	Ga0010727	Hydrothermal vent microbial communities from Guaymas and Carmen Basins, Gulf of California	Hydrothermal vent microbial communities from Guaymas and Carmen Basins, Gulf of California, Sample 420	Pennsylvania State University					1996	Gulf of California	Guaymas Basin, Gulf of California	27.823	-111.4	2008/7/1	50490754	128992	no
3300019455	Ga0193910	Microbial communities from sediments and microbial mats in various locations	Sorted cell/s from Southern Trench hydrothermal vent microbial mat, Guaymas Basin, Mexico - 4E_4869_18_06	DOE Joint Genome Institute (JGI)		SAMN08779146	SRX3973876	Illumina NextSeq-HO	2001	Mexico: Guaymas Basin	hydrothermal vent orange microbial mat from Ultra Mound gradient site	27.001	-110.6	2016/12/21	21739957	20055	no
2772191007	Ga0262972	Hydrothermal Fe-rich Mat Reference Genomes	Unclassified Zetaproteobacteria bacterium S6_FULL_No.5_3.2_50	University of Delaware											1273277	1353	no
2836571337	Ga0400680	Hydrothermal Fe-rich Mat Reference Genomes	Unclassified Zetaproteobacteria bacterium 482-BS8_FULL_No.12_0.4_62	Western Washington University											976406	1189	no
3300019386	Ga0193917	Microbial communities from sediments and microbial mats in various locations	Sorted cell/s from Southern Trench hydrothermal vent microbial mat, Guaymas Basin, Mexico - 6C_4862_10_11	DOE Joint Genome Institute (JGI)		SAMN08779206	SRX3974060	Illumina NextSeq-HO	1999	Mexico: Guaymas Basin	hydrothermal vent microbial mat 1 from Smoker "X", Site 4	27.001	-110.6	2016/12/13	477227	564	no
3300065502	Ga0606397	Hydrothermal vents viral and microbial communities from various locations in Pacific Ocean	Hydrothermal vent plume viral communities from North Pacific Ocean - CTD-AT42-06-002-1000m-0.03 v	DOE Joint Genome Institute (JGI)				Illumina NovaSeq S4	1000	North Pacific Ocean	Pelagic ocean, hydrothermal vent plume	8.39977	-104.981	2018/12/6	243314388	686984	no
3300039274	Ga0438755	Tubeworm-associated microbial communities from Endeavour hydrothermal vents, Juan de Fuca Ridge, Canada	Tubeworm-associated microbial communities from Endeavour hydrothermal vents, Juan de Fuca Ridge, Canada - high-flow bush MVw12	Dalhousie University				Illumina NextSeq 550	2433	Juan de Fuca Ridge, NE Pacific	Base of tubeworm bush	48.4303	-128.682	2016/8	565292569	965678	yes
3300010927	Ga0137765	Diffuse hydrothermal flow volcanic vent microbial communities from Axial Seamount, northeast Pacific Ocean	Diffuse hydrothermal flow volcanic vent microbial communities from Axial Seamount, northeast Pacific ocean - Sample FS917_55_13C_TP1_7	Marine Biological Laboratory				Illumina HiSeq 1000	1516	Marker 33, Axial Seamount, Northeast Pacific Ocean	Marker 33 diffuse flow vent, Axial Seamount	45.9332	-129.982	2015/8	7388285	15131	yes
3300002586	Ga0041816	Diffuse hydrothermal flow volcanic vent microbial communities from Axial Seamount, northeast Pacific Ocean	Diffuse hydrothermal flow volcanic vent microbial communities from Axial Seamount, northeast Pacific ocean - Sample FS903_55_12L	The Marine Biological Laboratory					1522	Marker 113, Axial Seamount, Northeast Pacific Ocean	Marker 113 diffuse flow vent, Axial Seamount	45.9227	-129.988		1421880	3550	no
3300001390	Ga0012452	Hydrothermal vent microbial communities from the Southwest Indian Ridge	SMAR1	Hong Kong University of Science and Technology				454 GS FLX Titanium			Hydrothermal vent				25572676	46148	no
2772190905	Ga0260559	Hydrothermal Fe-rich Mat Reference Genomes	Beggiatoa sp. S19_FULL_No.1_0.9_70	University of Delaware											2017668	2264	no
3300021513	Ga0190315	Microbial communities from sediments and microbial mats in various locations	Hydrothermal vent sediment bacterial communities from Southern Trench, Guaymas Basin, Mexico - 4870-11-0-1_MG	DOE Joint Genome Institute (JGI)		SAMN08779080	SRX3982217	Illumina HiSeq 2500-1TB	2005	Mexico: Guaymas Basin	Rebecca's Roost sulfide chimney, sediment	27.0118	-110.596	2016/12/22	332012557	697199	yes
2836392199	Ga0400497	Hydrothermal Fe-rich Mat Reference Genomes	Unclassified Zetaproteobacteria bacterium S19_FULL_No.1_10.0_100	University of Delaware											2006771	2129	no
3300003746	Ga0006257	Deep subsurface and oceanic microbial communities from Witwatersrand Basin, South Africa, and the Canadian and Fennoscandian shields and at the Lost City Hydrothermal Field	Deep subsurface microbial communities from North Pacific Ocean - 450_OLKR46/470m Metagenome	DOE Joint Genome Institute (JGI)		SAMN09092741			2658	North Pacific Ocean	Deep subsurface	47.8861	-127.75	2013/1/15	103212683	226192	no
3300002570	Ga0032366	Ridgeia piscesae microbial communities from Northeast Pacific Ocean hydrothermal vents	Host-associated microbial community of the tubeworm Ridgeia piscesae from hydrothermal vents Sample -index 10 (Axial LF)	Canada's Michael Smith Genome Sciences Centre				Illumina HiSeq 2000, Illumina HiSeq 2500	1517.1	Axial Volcano (Hotspot 2)	Main endeavour ridge Hulk	47.9334	-129.967	2010/1/1	188970549	547367	no
2616644878	Ga0072670	Hydrothermal vent microbial communities from Crab Spa hydrothermal vent, East Pacific Rise	Sulfurovum sp. SCGC AD-682-E17 (contamination screened)	Bigelow Laboratory Single Cell Genomics Center (SCGC)				Illumina		Pacific Ocean: East Pacific Rise, Crab Spa		9.83997	-104.294		596468	637	no
2616644919	Ga0072828	Hydrothermal vent microbial communities from Crab Spa hydrothermal vent, East Pacific Rise	Sulfurovum sp. SCGC AD-726-I20 (contamination screened)	Bigelow Laboratory Single Cell Genomics Center (SCGC)				Illumina		Pacific Ocean: East Pacific Rise, Crab Spa		9.83997	-104.294		831138	902	no
3300021472	Ga0190363	Microbial communities from sediments and microbial mats in various locations	Hydrothermal vent microbial mat bacterial communities from Southern Trench, Guaymas Basin, Mexico - 4872-18-6-7_MG	DOE Joint Genome Institute (JGI)		SAMN08779106	SRX3982357	Illumina HiSeq 2500-1TB	2011	Mexico: Guaymas Basin	Cathedral Hill gradient site, white microbial mat	27.0114	-110.596	2016/12/24	535522184	1088135	yes
2728369440	Ga0180864	Deep subsurface and oceanic microbial communities from Witwatersrand Basin, South Africa, and the Canadian and Fennoscandian shields and at the Lost City Hydrothermal Field	Unclassified bacterium JdFR-53	DOE Joint Genome Institute (JGI)											346303	427	no
3300003741	Ga0062509	Diffuse hydrothermal flow volcanic vent microbial communities from Axial Seamount, northeast Pacific Ocean	Diffuse hydrothermal flow volcanic vent microbial communities from Axial Seamount, northeast Pacific ocean - Sample FS904_55_12L	Marine Biological Laboratory				Illumina HiSeq 1000	1516	Marker 33 diffuse flow vent, Axial Seamount	Marker 33 diffuse flow vent, Axial Seamount	45.9332	-129.982		1764119	4209	no
3300019438	Ga0193912	Microbial communities from sediments and microbial mats in various locations	Sorted cell/s from Southern Trench hydrothermal vent microbial mat, Guaymas Basin, Mexico - 4D_dil_4869_18_12	DOE Joint Genome Institute (JGI)		SAMN08776958	SRX3973837	Illumina NextSeq-HO	2001	Mexico: Guaymas Basin	hydrothermal vent orange microbial mat from Ultra Mound gradient site	27.001	-110.6	2016/12/21	9739088	7663	no
2728369445	Ga0180855	Deep subsurface and oceanic microbial communities from Witwatersrand Basin, South Africa, and the Canadian and Fennoscandian shields and at the Lost City Hydrothermal Field	Candidatus Hydrothermae bacterium JdFR-73	DOE Joint Genome Institute (JGI)											1305425	1365	no
2836409741	Ga0400545	Hydrothermal Fe-rich Mat Reference Genomes	Unclassified Zetaproteobacteria bacterium S19_FULL_No.10_0.6_32	University of Delaware											1108207	1345	no
3300042041	Ga0451330	Mollusc gills microbial communities from various hydrothermal vent in Atlantic Ocean	Mollusc gills microbial communities from Lilliput hydrothermal vent, Atlantic Ocean - BspSym_Li_4_5-1	Max Planck Institute for Marine Microbiology		SAMEA5664328	ERX3367177	Illumina HiSeq 2500	1494	South Atlantic Ocean	mollusc gills	-9.54817	-13.2088	2009/4/29	241849770	288068	no
3300011092	Ga0151396	Diffuse hydrothermal flow volcanic vent microbial communities from Axial Seamount, northeast Pacific Ocean	Diffuse hydrothermal flow volcanic vent microbial communities from Axial Seamount, northeast Pacific ocean - Sample FS903_55_13H reanalysis	The Marine Biological Laboratory					1522	Marker 113, Axial Seamount, Northeast Pacific Ocean	Marker 113 diffuse flow vent, Axial Seamount	45.9227	-129.988		2394218	5868	no
3300019457	Ga0193932	Microbial communities from sediments and microbial mats in various locations	Sorted cell/s from Southern Trench hydrothermal vent microbial mat, Guaymas Basin, Mexico - 6X_4868_18_01	DOE Joint Genome Institute (JGI)		SAMN08779211	SRX3974300	Illumina NextSeq-HO	2002	Mexico: Guaymas Basin	hydrothermal vent orange microbial mat from Ultra Mound, Coring site 2, gradient	27.001	-110.6	2016/12/19	27903648	30239	no
2616644884	Ga0072690	Hydrothermal vent microbial communities from Crab Spa hydrothermal vent, East Pacific Rise	Arcobacter sp. SCGC AD-684-E06 (contamination screened)	Bigelow Laboratory Single Cell Genomics Center (SCGC)				Illumina		Pacific Ocean: East Pacific Rise, Crab Spa		9.83997	-104.294		272965	288	no
3300003872	Ga0062600	Black Smoker Hydrothermal vent Microbial communities from Manus Basin , Bismarck Sea	Black Smoker Hydrothermal vent Microbial communities from Manus Basin , Bismarck Sea - Sample 373Cnorm	Max Planck Institute for Plant Breeding Research				Illumina HiSeq 2500	1680	Deep-Sea, Bismarck Sea, Papua New Guinea	Roman Ruins hydrothermal vent field, Deep-Sea, Bismarck Sea, Papua New Guinea,	-3.72119	151.675		95292087	122217	no
3300000306	Ga0011201	Alviniconcha endosymbiont microbial communities from the Eastern Lau Spreading center hydrothermal vents, Pacific Ocean	Gamma1	Harvard University				Illumina HiSeq 2000	2145.75	Eastern Lau Spreading Center, ABE	Alviniconcha endosymbiont	-20.7639	-176.192	2009/5/25	3644675	5154	no
3300006089	Ga0082012	Diffuse hydrothermal flow volcanic vent microbial communities from Axial Seamount, northeast Pacific Ocean	Diffuse hydrothermal flow volcanic vent microbial communities from Axial Seamount, northeast Pacific ocean - Sample FS908_Marker33_RNA	Marine Biological Laboratory				Illumina HiSeq 1000	1514	North Pacific Ocean: Axial Seamount	Marker 33 vent, Axial seamount	45.9332	-129.982	2014/8/16	1579668	5867	no
2836394329	Ga0400498	Hydrothermal Fe-rich Mat Reference Genomes	Unclassified Zetaproteobacteria bacterium S19_FULL_No.2_4.0_18	University of Delaware											583069	698	no
3300003540	Ga0060335	Diffuse hydrothermal flow volcanic vent microbial communities from Axial Seamount, northeast Pacific Ocean	Diffuse hydrothermal flow volcanic vent microbial communities from Axial Seamount, northeast Pacific ocean - Sample FS896_ElGuapo_DNA					Illumina	1507	North Pacific Ocean: Axial Seamount	El Guapo diffuse flow vent, Axial seamount	45.9266	-129.979		578244857	1335173	no
3300050948	Ga0504826	Sorted cell/s from hydrothermal vent fluid, Lost City Hydrothermal field, North Atlantic Ocean	Sorted cell/s from hydrothermal vent fluid, Lost City Hydrothermal field, North Atlantic Ocean - AH-956-K11	DOE Joint Genome Institute (JGI)		SAMN49208287	SRX29499794	Illumina NovaSeq S4		North Atlantic Ocean	hydrothermal vent fluid	30.1197	-42.1244	2018/9/21	200723	268	no
2616644908	Ga0072714	Hydrothermal vent microbial communities from Crab Spa hydrothermal vent, East Pacific Rise	Bacteroidetes sp. SCGC AD-702-M03 (unscreened)	Bigelow Laboratory Single Cell Genomics Center (SCGC)				Illumina		Pacific Ocean: East Pacific Rise, Crab Spa		9.83997	-104.294		1425649	1208	no
3300010925	Ga0137771	Diffuse hydrothermal flow volcanic vent microbial communities from Axial Seamount, northeast Pacific Ocean	Diffuse hydrothermal flow volcanic vent microbial communities from Axial Seamount, northeast Pacific ocean - Sample FS917_55_13C_TP1_INC4_6	Marine Biological Laboratory				Illumina HiSeq 1000	1516	Marker 33, Axial Seamount, Northeast Pacific Ocean	Marker 33 diffuse flow vent, Axial Seamount	45.9332	-129.982	2015/8	4702953	9410	yes
3300042059	Ga0451318	Mollusc gills microbial communities from various hydrothermal vent in Atlantic Ocean	Mollusc gills microbial communities from Clueless hydrothermal vent, Atlantic Ocean - BspSym_Cl_2_11-3	Max Planck Institute for Marine Microbiology		SAMEA5664335	ERX3367184	Illumina HiSeq 2500	2972	South Atlantic Ocean	mollusc gills	-4.80327	-12.3718	2009/4/22	379210255	415231	no
3300010920	Ga0137762	Diffuse hydrothermal flow volcanic vent microbial communities from Axial Seamount, northeast Pacific Ocean	Diffuse hydrothermal flow volcanic vent microbial communities from Axial Seamount, northeast Pacific ocean - Sample FS917_55_12C_TP1_10	Marine Biological Laboratory				Illumina HiSeq 1000	1516	Marker 33, Axial Seamount, Northeast Pacific Ocean	Marker 33 diffuse flow vent, Axial Seamount	45.9332	-129.982	2015/8	3359089	6886	no
2772191005	Ga0262970	Hydrothermal Fe-rich Mat Reference Genomes	Unclassified Zetaproteobacteria bacterium S6_FULL_No.3_4.2_96	University of Delaware											2044228	2172	no
2836431279	Ga0400562	Hydrothermal Fe-rich Mat Reference Genomes	Unclassified Zetaproteobacteria bacterium 664-BS3_FULL_No.1_1.4_81	University of Delaware											1857863	2018	no
2225789007	Ga0011233	Marine microbial communities from a deep-sea hydrothermal vent at Loihi Seamount, Hawaii	Marine microbial communities from hydrothermal vents at Loihi seamountain, Hawaii	Pennsylvania State University				454 GS FLX Titanium	5000	USA: Loihi Seamount, Hawaii	Biomats	18.92	-155.27		11793818	19650	no
2728369338	Ga0180865	Deep subsurface and oceanic microbial communities from Witwatersrand Basin, South Africa, and the Canadian and Fennoscandian shields and at the Lost City Hydrothermal Field	Aciduliprofundum sp. JdFR-44	DOE Joint Genome Institute (JGI)											519420	671	no
2836567223	Ga0400678	Hydrothermal Fe-rich Mat Reference Genomes	Unclassified Zetaproteobacteria bacterium 482-BS8_FULL_No.10_0.6_74	Western Washington University											2019507	2341	no
2617270894	Ga0073560	Genome sequencing of Thermotogales isolates from hydrothermal vents	Thermosipho melanesiensis 434	Norwegian Sequencing Centre (NSC)		SAMN03284850		Illumina MiSeq		Pacific Ocean, Lau Basin	Pacific Ocean, Lau Basin				1890582	1881	no
3300026546	Ga0256913	Marine microbial communities from hydrothermal vents in the Atlantic and Pacific Ocean	Deep-sea worm associated microbial mat communities from Axial Seamount, Juan de Fuca Ridge, Pacific Ocean - Axial_Mat	DOE Joint Genome Institute (JGI)		SAMN09093778	SRX4804628	Illumina HiSeq 2500-1TB	1200	Pacific Ocean: Juan de Fuca Ridge	microbial mat from Paralvinella palmiformis worms	45.9333	-130.014	2011/7/16	1068690604	1606672	no
3300009336	Ga0120402	Microbial community analysis of hydrothermal vent diffuse flow samples from Mid-Cayman Rise, Pacific Ocean	Microbial community analysis of hydrothermal vent diffuse flow samples from Mid-Cayman Rise, Pacific Ocean - FS874 FS874 no min length	Marine Biological Laboratory				Illumina HiSeq	2369	Mid-Cayman Rise	diffuse flow hydrothermal vent	18.376	-81.797	2013/6/26	33914669	104806	no
2836396422	Ga0400536	Hydrothermal Fe-rich Mat Reference Genomes	Unclassified Zetaproteobacteria bacterium S19_FULL_No.3_1.9_9	University of Delaware											540495	685	no
3300028315	Ga0302095	Black smoker hydrothermal vent sediment microbial communities from the Guaymas Basin, Mid-Atlantic Ridge, South Atlantic Ocean	Black smoker hydrothermal vent sediment microbial communities from the Guaymas Basin, Mid-Atlantic Ridge, South Atlantic Ocean - BSmoChi-MAR-TVG11 reanalysis	Beijing Genomics Institute (BGI)				Illumina HiSeq X Ten	2770	Mid-Atlantic Ridge, South Atlantic Ocean	Mid-Atlantic Ridge, South Atlantic Ocean	-15.16	-13.35	2012/8	4922220859	7761684	no
3300010419	Ga0137498	Diffuse hydrothermal flow volcanic vent microbial communities from Axial Seamount, northeast Pacific Ocean	Diffuse hydrothermal flow volcanic vent microbial communities from Axial Seamount, northeast Pacific ocean - Sample FS908_80_TP1_12L	Marine Biological Laboratory				Illumina HiSeq 1000	1516	Marker 33, Axial Seamount, Northeast Pacific Ocean	Marker 33 diffuse flow vent, Axial Seamount	45.9332	-129.982	2014/8	1111188	2480	no
3300039037	Ga0243141	Sediment and seawater microbial communities from hydrothermal vent in Taiwan, China	Seawater microbial communities from hydrothermal vent in Taiwan, China - W2	Xiamen University		SAMN06199460	SRX2538513	Illumina HiSeq 2500	7	China: Taiwan	coastal water body	24.8341	121.962	2015/5/26	62373017	114482	no
2836454158	Ga0400580	Hydrothermal Fe-rich Mat Reference Genomes	Unclassified Zetaproteobacteria bacterium 664-SC8_FULL_No.11_0.6_52	University of Delaware											946979	1146	no
3300006608	Ga0101556	Diffuse hydrothermal flow volcanic vent microbial communities from Axial Seamount, northeast Pacific Ocean	Diffuse hydrothermal flow volcanic vent microbial communities from Axial Seamount, northeast Pacific ocean - Sample FS903_Marker113_RNA	The Marine Biological Laboratory				Illumina	1522	North Pacific Ocean: Axial Seamount	Marker 113 diffuse flow vent, Axial Seamount	45.9227	-129.988		3671772	12470	no
3300041282	Ga0453478	Diffuse flow microbial communities from hydrothermal vent near Loihi Seamount, Hawaii, USA	Diffuse flow microbial communities from hydrothermal vent near Loihi Seamount, Hawaii, USA - MH3012C10	Marine Biological Laboratory				Illumina NextSeq 500	635	USA: Kilauea Volcano, Hawaii	Diffuse flow from hydrothermal vent	19.42	-155.28	2018/8/28	1545725	2259	no
2728369419	Ga0180897	Deep subsurface and oceanic microbial communities from Witwatersrand Basin, South Africa, and the Canadian and Fennoscandian shields and at the Lost City Hydrothermal Field	Nitrospirae bacterium JdFR-86	DOE Joint Genome Institute (JGI)											2103466	2143	no
3300001763	Ga0012996	Hydrothermal vent plume microbial communities from the Cayman Rise, Cayman Islands	Hydrothermal vent plume microbial communities from the Mid Cayman Rise - Beebe Supr51	University of Michigan				Illumina HiSeq 2000	4000	Beebe Vents, Mid Cayman Rise	Beebe Vents, Mid Cayman Rise	18.35	-81.85		76082151	113445	no
3300048886	Ga0496670	Hydrothermal vents viral and microbial communities from various locations in Pacific Ocean	Hydrothermal vent plume microbial communities from Gulf of California, Mexico - CTD-FK190211-025-250m-0.65	DOE Joint Genome Institute (JGI)		SAMN51147381	SRX30607581	Illumina NovaSeq S4	250	Mexico: Gulf of California	Pelagic ocean, hydrothermal vent plume	23.9566	-108.862	2019/3/9	1161373367	1778588	no
2616644882	Ga0072688	Hydrothermal vent microbial communities from Crab Spa hydrothermal vent, East Pacific Rise	Thioreductor sp. SCGC AD-684-A05 (contamination screened)	Bigelow Laboratory Single Cell Genomics Center (SCGC)				Illumina		Pacific Ocean: East Pacific Rise, Crab Spa		9.83997	-104.294		1849279	2008	no
3300021488	Ga0190305	Microbial communities from sediments and microbial mats in various locations	Hydrothermal vent sediment bacterial communities from Southern Trench, Guaymas Basin, Mexico - 4870-07-2-3_MG	DOE Joint Genome Institute (JGI)		SAMN08778798	SRX3982108	Illumina HiSeq 2500-1TB	1999	Mexico: Guaymas Basin	Cathedral Hill gradient site area, sediment	27.0114	-110.593	2016/12/22	116921597	241508	yes
2236876000	Ga0011252	Hydrothermal vent microbial communities from Guaymas and Carmen Basins, Gulf of California	GB background transcript assembly	Pennsylvania State University				Illumina HiSeq 2000	1990	Guaymas Basin, Gulf of California	Guaymas Basin, Gulf of California	27.506	-111.347	2004/7/18	7222325	32690	no
2866982901	Ga0437572	Serinicoccus guishaninsula JLT9 Genome sequencing	Serinicoccus sp. JLT9	Xiamen University		SAMN04578256		Illumina, PacBio RS		Taiwan: Kueishantao Island	shallow-sea hydrothermal system	24.8333	121.95		3597394	3474	no
2728369296	Ga0180919	Deep subsurface and oceanic microbial communities from Witwatersrand Basin, South Africa, and the Canadian and Fennoscandian shields and at the Lost City Hydrothermal Field	Candidatus Bathyarchaeota archaeon JdFR-05	DOE Joint Genome Institute (JGI)											433479	571	no
3300048881	Ga0496661	Hydrothermal vents viral and microbial communities from various locations in Pacific Ocean	Hydrothermal vent plume microbial communities from Gulf of California, Mexico - CTD-FK190211-07-500m-0.1	DOE Joint Genome Institute (JGI)		SAMN51146759	SRX30607209	Illumina NovaSeq S4	500	Mexico: Gulf of California	Pelagic ocean, hydrothermal vent plume	27.583	-111.465	2019/3/3	760093050	1220006	yes
3300003508	Ga0060291	Diffuse hydrothermal flow volcanic vent microbial communities from Axial Seamount, northeast Pacific Ocean	Diffuse hydrothermal flow volcanic vent microbial communities from Axial Seamount, northeast Pacific ocean - Sample FS820_Marshmallow_RNA					Illumina	1544	North Pacific Ocean: Axial Seamount	Marshmallow diffuse flow, Axial seamount	45.934	-130.013	2011/1/1	5801347	17568	no
3300042076	Ga0451315	Mollusc gills microbial communities from various hydrothermal vent in Atlantic Ocean	Mollusc gills microbial communities from Clueless hydrothermal vent, Atlantic Ocean - BspSym_Cl_5_11-6	Max Planck Institute for Marine Microbiology		SAMEA5664332	ERX3367181	Illumina HiSeq 2500	2972	South Atlantic Ocean	mollusc gills	-4.80327	-12.3718	2009/4/22	172954511	206260	no
3300019453	Ga0193935	Microbial communities from sediments and microbial mats in various locations	Sorted cell/s from Southern Trench hydrothermal vent sediment, Guaymas Basin, Mexico - 6AA_4869_02_16	DOE Joint Genome Institute (JGI)		SAMN08777491	SRX3974362	Illumina NextSeq-HO	2001	Mexico: Guaymas Basin	hydrothermal vent brown sediment from Ultra Mound, gradient site	27.001	-110.6	2016/12/21	16946901	17865	no
2836529275	Ga0400643	Hydrothermal Fe-rich Mat Reference Genomes	Unclassified Zetaproteobacteria bacterium 479-BS4_FULL_No.12_1.1_38	Western Washington University											778168	926	no
3300048629	Ga0496622	Hydrothermal vents viral and microbial communities from various locations in Pacific Ocean	Hydrothermal vent fluid microbial communities from North Pacific Ocean - A5008A-Sterivex	DOE Joint Genome Institute (JGI)		SAMN51148547	SRX30607277	Illumina NovaSeq S4	2515	North Pacific Ocean	Pelagic ocean, hydrothermal vent fluid	9.84167	-104.292	2018/12/12	401284916	686605	no
2616644883	Ga0072689	Hydrothermal vent microbial communities from Crab Spa hydrothermal vent, East Pacific Rise	Thioreductor sp. SCGC AD-684-B23 (contamination screened)	Bigelow Laboratory Single Cell Genomics Center (SCGC)				Illumina		Pacific Ocean: East Pacific Rise, Crab Spa		9.83997	-104.294		1090123	1220	no
3300017918	Ga0183808	Microbial communities from hydrothermal vent in East Pacific Rise, Pacific Ocean	Biofilm microbial communities from hydrothermal vent in East Pacific Rise, Pacific Ocean - CV88	Bigelow Laboratory for Ocean Sciences				Illumina	2503	East Pacific Rise, Pacific Ocean	hydrothermal vent flluid	9.84	-104.29	2014/11/14	58046913	237369	yes
3300001392	Ga0012454	Black smokers hydrothermal plume microbial communities from the Eastern Lau Spreading Center	ELSC Metagenome	University of Michigan					2600	Kilo Moana - ELSC (Lau Basin)	Kilo Moana	-20	176		380869738	508679	no
3300065505	Ga0496614	Hydrothermal vents viral and microbial communities from various locations in Pacific Ocean	Hydrothermal vent plume viral communities from Gulf of California, Mexico - CTD-FK190211-025-250m-0.03 v	DOE Joint Genome Institute (JGI)				Illumina NovaSeq S4	250	Mexico: Gulf of California	Pelagic ocean, hydrothermal vent plume	23.9566	-108.862	2019/3/9	406278622	980368	no
3300028827	Ga0310046	Axial Seamount Reassemblies	Marine deep subsurface microbial communities from hydrothermal vents in Axial Seamount, Pacific Ocean - FS900_Dependable_DNA IDBA_UD reassembly	The Marine Biological Laboratory		SAMEA3143273	ERX639157, ERX639171, ERX639175, ERX639170, ERX639159, ERX639160, ERX639173, ERX639158, ERX639178, ERX639177, ERX639161, ERX639162, ERX639172, ERX639156, ERX639174, ERX639176, ERX639166, ERX639163, ERX639168, ERX639169, ERX639165, ERX639164, ERX639167	Illumina HiSeq 1000		Pacific Ocean: Axial Seamount	Low temperature diffuse fluid vents	45.8799	-129.803	2013	511963681	1150313	yes
3300001515	Ga0012964	Hydrothermal vent plume microbial communities from Kilo Moana, Pacific Ocean, of black smokers	Hydrothermal vent plume microbial communities from Kilo Moana, Pacific Ocean, of black smokers	University of Michigan				Illumina HiSeq 2000	2600	Kilo Moana, ELSC, Pacific Ocean	Kilo Moana, ELSC, Pacific Ocean	-20.0644	-176.172		177519424	250868	no
2836400816	Ga0400540	Hydrothermal Fe-rich Mat Reference Genomes	Unclassified Zetaproteobacteria bacterium S19_FULL_No.6_0.9_34	University of Delaware											1336436	1582	no
3300019452	Ga0193936	Microbial communities from sediments and microbial mats in various locations	Sorted cell/s from Southern Trench hydrothermal vent sediment, Guaymas Basin, Mexico - 6AD_4869_02_32	DOE Joint Genome Institute (JGI)		SAMN08776952	SRX3974424	Illumina NextSeq-HO	2001	Mexico: Guaymas Basin	hydrothermal vent brown sediment from Ultra Mound, gradient site	27.001	-110.6	2016/12/21	16755725	17924	no
2728369320	Ga0180886	Deep subsurface and oceanic microbial communities from Witwatersrand Basin, South Africa, and the Canadian and Fennoscandian shields and at the Lost City Hydrothermal Field	Candidatus Hydrothermarchaeota archaeon JdFR-18	DOE Joint Genome Institute (JGI)											2062134	2320	no
2836397108	Ga0400537	Hydrothermal Fe-rich Mat Reference Genomes	Unclassified Zetaproteobacteria bacterium S19_FULL_No.4_1.7_56	University of Delaware											1497197	1778	no
3300021486	Ga0190346	Microbial communities from sediments and microbial mats in various locations	Hydrothermal vent microbial mat bacterial communities from Southern Trench, Guaymas Basin, Mexico - 4872-13-4-5_MG	DOE Joint Genome Institute (JGI)		SAMN08779247	SRX3982302	Illumina HiSeq 2500-1TB	2011	Mexico: Guaymas Basin	Cathedral Hill gradient site, white microbial mat	27.0114	-110.596	2016/12/24	119658292	239184	no
3300003877	Ga0063040	Black smoker hydrothermal chimney microbial communities from Manus Basin, Bismarck Sea	Black smoker hydrothermal chimney microbial communities from Manus Basin, Bismarck Sea - 373A_norm	Max Planck Institute for Marine Microbiology				Illumina HiSeq 2000			Black smoker hydrothermal chimney				146170108	193464	no
2728369325	Ga0180939	Deep subsurface and oceanic microbial communities from Witwatersrand Basin, South Africa, and the Canadian and Fennoscandian shields and at the Lost City Hydrothermal Field	Archaeoglobus sp. JdFR-40	DOE Joint Genome Institute (JGI)											530115	657	no
3300042078	Ga0451317	Mollusc gills microbial communities from various hydrothermal vent in Atlantic Ocean	Mollusc gills microbial communities from Clueless hydrothermal vent, Atlantic Ocean - BspSym_Cl_3_11-4	Max Planck Institute for Marine Microbiology		SAMEA5664334	ERX3367183	Illumina HiSeq 2500	2972	South Atlantic Ocean	mollusc gills	-4.80327	-12.3718	2009/4/22	365154113	401337	no
2728369298	Ga0180921	Deep subsurface and oceanic microbial communities from Witwatersrand Basin, South Africa, and the Canadian and Fennoscandian shields and at the Lost City Hydrothermal Field	Candidatus Bathyarchaeota archaeon JdFR-08	DOE Joint Genome Institute (JGI)											919095	1035	no
3300013007	Ga0157631	Symbiotic microbial communities associated with the hydrothermal yeti crab kiwa sp. n. from the East Pacific Rise in the East Pacific Ocean	Symbiotic microbial communities associated with the hydrothermal yeti crab kiwa sp. n. from the East Pacific Rise in the East Pacific Ocean - crab 1, guts	Majorbio Bio-pharm Technology Co., Ltd.		SAMN06127717		Illumina HiSeq		East Pacific Rise	Kiwa sp.n guts	1.2305	-101.482	2009/11	38462694	61479	no
3300003506	Ga0060296	Diffuse hydrothermal flow volcanic vent microbial communities from Axial Seamount, northeast Pacific Ocean	Diffuse hydrothermal flow volcanic vent microbial communities from Axial Seamount, northeast Pacific ocean - Sample FS857_Anemone_RNA					Illumina	1543	North Pacific Ocean: Axial Seamount	Anemone diffuse flow vent, Axial seamount	45.933	-130.014	2012/8/1	3112207	10139	no
2616644859	Ga0072651	Hydrothermal vent microbial communities from Crab Spa hydrothermal vent, East Pacific Rise	Sulfurovum sp. SCGC AAA036-J22 (contamination screened)	Bigelow Laboratory Single Cell Genomics Center (SCGC)				Illumina		Pacific Ocean: East Pacific Rise, Crab Spa		9.83997	-104.294		410627	395	no
2836511590	Ga0400630	Hydrothermal Fe-rich Mat Reference Genomes	Unclassified Zetaproteobacteria bacterium 479-BS3_FULL_No.4_1.8_52	Oregon Health and Science University (OHSU)											1211440	1629	no
2728369336	Ga0180871	Deep subsurface and oceanic microbial communities from Witwatersrand Basin, South Africa, and the Canadian and Fennoscandian shields and at the Lost City Hydrothermal Field	Archaeoglobus sp. JdFR-33	DOE Joint Genome Institute (JGI)											478535	581	no
3300040950	Ga0450808	Mollusc gills microbial communities from various hydrothermal vent in Atlantic Ocean	Mollusc gills microbial communities from Wideawake hydrothermal vent, Atlantic Ocean - BspSym_Wi_1_11814	Max Planck Institute for Marine Microbiology		SAMEA5664325	ERX3367174	PacBio RS II	2989	South Atlantic Ocean	mollusc gills	-4.81043	-12.3724	2008/8/21	4410291	4534	no
3300021514	Ga0190293	Microbial communities from sediments and microbial mats in various locations	Hydrothermal vent microbial mat bacterial communities from Southern Trench, Guaymas Basin, Mexico - 4869-30-0-1_MG	DOE Joint Genome Institute (JGI)		SAMN08779428	SRX30216836	Illumina HiSeq 2500-1TB	2001	Mexico: Guaymas Basin	Ultra Mound gradient site, orange microbial mat	27.0074	-110.591	2016/12/21	378970519	782903	yes
3300007719	Ga0105671	Diffuse hydrothermal flow volcanic vent microbial communities from Axial Seamount, northeast Pacific Ocean	Diffuse hydrothermal flow volcanic vent microbial communities from Axial Seamount, northeast Pacific ocean - Sample FS907_Anemone_RNA_Filter2 CLC_assembly	Marine Biological Laboratory				Illumina NextSeq	1539	Northeast Pacific Ocean: Anemone vent, Axial Seamount	Axial Seamount, northeast Pacific Ocean	45.9332	-130.014	2014/8/15	254420	543	no
3300003886	Ga0063293	Black smoker hydrothermal vent sediment microbial communities from the Guaymas Basin, Mid-Atlantic Ridge, South Atlantic Ocean	Black smoker hydrothermal vent sediment microbial communities from the Guaymas Basin, Mid-Atlantic Ridge, South Atlantic Ocean - Sample 1	Beijing Genomics Institute (BGI)				Illumina HiSeq 2500	2770	Mid-Atlantic Ridge, South Atlantic Ocean	Mid-Atlantic Ridge, South Atlantic Ocean	-15.16	-13.35	2012/8	1707488258	3028071	no
3300041283	Ga0453477	Diffuse flow microbial communities from hydrothermal vent near Loihi Seamount, Hawaii, USA	Diffuse flow microbial communities from hydrothermal vent near Loihi Seamount, Hawaii, USA - MH3012C8	Marine Biological Laboratory				Illumina NextSeq 500	635	USA: Kilauea Volcano, Hawaii	Diffuse flow from hydrothermal vent	19.42	-155.28	2018/8/28	4205596	5647	no
3300028029	Ga0256845	Marine microbial communities from hydrothermal vents in the Atlantic and Pacific Ocean	Tube worm associated microbial communities from hydrothermal vent at the East Pacific Rise, Pacific Ocean - Riftia	DOE Joint Genome Institute (JGI)		SAMN10350737	SRX5246490	Illumina HiSeq 2500-1TB	2503	Pacific Ocean: East Pacific Rise	Scraping of Riftia pachyptila	9.8441	-104.297	2014/11/18	592228120	1094814	no
3300028398	Ga0256833	Marine microbial communities from hydrothermal vents in the Atlantic and Pacific Ocean	Hydrothermal vent microbial communities from Mid Atlantic Ridge, Atlantic Ocean - 356-284	DOE Joint Genome Institute (JGI)		SAMN10350645	SRX5246604	Illumina HiSeq 2500-1TB	1720	Atlantic Ocean: Mid Atlantic Ridge	Hydrothermal sulfide rock	37.2917	-32.2779	2008/7/24	596509297	1061789	yes
2728369331	Ga0180937	Deep subsurface and oceanic microbial communities from Witwatersrand Basin, South Africa, and the Canadian and Fennoscandian shields and at the Lost City Hydrothermal Field	Archaeoglobus sp. JdFR-34	DOE Joint Genome Institute (JGI)											1088064	1223	no
3300009475	Ga0120403	Microbial community analysis of hydrothermal vent diffuse flow samples from Mid-Cayman Rise, Pacific Ocean	Microbial community analysis of hydrothermal vent diffuse flow samples from Mid-Cayman Rise, Pacific Ocean - FS849 no min length	Marine Biological Laboratory				Illumina HiSeq	2297	Mid-Cayman Rise	FS841 Mid-Cayman Rise diffuse flow	18.3767	-81.7981	2012/1/19	140096974	765045	no
3300005788	Ga0079398	Diffuse hydrothermal flow volcanic vent microbial communities from Axial Seamount, northeast Pacific Ocean	Diffuse hydrothermal flow volcanic vent microbial communities from Axial Seamount, northeast Pacific ocean - Sample FS904_Marker33_DNA	The Marine Biological Laboratory				Illumina	1516	North Pacific Ocean: Axial Seamount	Marker 33 diffuse flow vent, Axial Seamount	45.9332	-129.982		17685726	24222	no
2836437181	Ga0400567	Hydrothermal Fe-rich Mat Reference Genomes	Unclassified Zetaproteobacteria bacterium 664-BS3_FULL_No.6_0.6_46	University of Delaware											1832396	2236	no
3300042710	Ga0454350	Microbial symbiotic communities from bathmodiolin mussel gills	Mollusc gills microbial communities from Lilliput hydrothermal vent, Atlantic Ocean - BspSym_Li_2_10-4 Re-assembly	Max Planck Institute for Marine Microbiology		SAMEA5664330	ERX3367179	Illumina HiSeq 2500	1494	South Atlantic Ocean	mollusc gills	-9.54817	-13.2088	2009/4/29	236608435	227000	no
8060994438	Ga0176271	Genome sequencing of cellulolytic heat tolerant Bacillus isolates from Yellowstone National Park hydrothermal-vegetative environments	Bacillus licheniformis YNP3-TSU	Tennessee State University		SAMN05560543	SRX2019000	Illumina HiSeq 3000	0.04	USA: Yellowstone National Park, Wyoming	imperial geyser, near vegetative/sediment and waters edge	44.531	-110.875		4517330	5045	no
3300038377	Ga0434942	Diffuse flow microbial communities from hydrothermal vent near Loihi Seamount, Hawaii, USA	Seawater microbial communities from hydrothermal vent pit near Loihi Seamount, Hawaii, USA - 59	The Marine Biological Laboratory				Illumina NextSeq	1000.000000 to 1200.000000	USA: Loihi Seamount, Hawaii	Near diffuse flow from hydrothermal vent	18.92	-155.27	2018/8	31311913	47922	no
3300021792	Ga0226836	Characterization of microbial community from Mariana Back Arc	Hydrothermal fluids microbial communities from Mariana Back-Arc Basin vent fields, Pacific Ocean - Illium_FS922 150_kmer	Marine Biological Laboratory				Illumina NextSeq	3582.53	Illium vent field, Mariana back arc basin	Illium vent field	18.2136	144.707	2016/12/6	1192904262	2121588	no
2616644901	Ga0072707	Hydrothermal vent microbial communities from Crab Spa hydrothermal vent, East Pacific Rise	Thioreductor sp. SCGC AD-699-O04 (contamination screened)	Bigelow Laboratory Single Cell Genomics Center (SCGC)				Illumina		Pacific Ocean: East Pacific Rise, Crab Spa		9.83997	-104.294		1352300	1539	no
3300001835	Ga0016746	Hydrothermal vent plume microbial communities from the Cayman Rise, Cayman Islands	Hydrothermal vent plume microbial communities from the Mid Cayman Rise - Shallow Sites - gte4kb	University of Michigan				Illumina HiSeq 2000	2000	Mid Cayman Rise, Cayman Islands, UK	Mid Cayman Rise, multiple sites combined	18.35	-81.85		160839103	168378	no
3300003873	Ga0062599	Black Smoker Hydrothermal vent Microbial communities from Manus Basin , Bismarck Sea	Black Smoker Hydrothermal vent Microbial communities from Manus Basin , Bismarck Sea - Sample 373Bnorm	Max Planck Institute for Plant Breeding Research					1680	Manus Basin, Bismarck Sea	Black Smokers at Manus Basin, Bismarck Sea	-3.565	149.989		113872061	143076	no
3300050946	Ga0504824	Sorted cell/s from hydrothermal vent fluid, Lost City Hydrothermal field, North Atlantic Ocean	Sorted cell/s from hydrothermal vent fluid, Lost City Hydrothermal field, North Atlantic Ocean - AH-956-J10	DOE Joint Genome Institute (JGI)		SAMN49208291	SRX29505294	Illumina NovaSeq S4		North Atlantic Ocean	hydrothermal vent fluid	30.1197	-42.1244	2018/9/21	872190	961	no
3300000308	Ga0011207	Alviniconcha endosymbiont microbial communities from the Eastern Lau Spreading center hydrothermal vents, Pacific Ocean	Epsilon	Harvard University				Illumina HiSeq 2000	2614.24	Eastern Lau Spreading Center, Kilo Moana	Alviniconcha endosymbiont	-20.0536	-176.133	2009/6/6	1911618	2388	no
2616644906	Ga0072712	Hydrothermal vent microbial communities from Crab Spa hydrothermal vent, East Pacific Rise	Epsilon proteobacterium SCGC AD-702-K02 (contamination screened)	Bigelow Laboratory Single Cell Genomics Center (SCGC)				Illumina		Pacific Ocean: East Pacific Rise, Crab Spa		9.83997	-104.294		539528	570	no
3300050941	Ga0504819	Sorted cell/s from hydrothermal vent fluid, Lost City Hydrothermal field, North Atlantic Ocean	Sorted cell/s from hydrothermal vent fluid, Lost City Hydrothermal field, North Atlantic Ocean - AH-956-F10	DOE Joint Genome Institute (JGI)		SAMN49208303	SRX29498436	Illumina NovaSeq S4		North Atlantic Ocean	hydrothermal vent fluid	30.1197	-42.1244	2018/9/21	345298	405	no
2893475991	Ga0454285	Hydrothermal Fe-rich Mat Reference Genomes	Unclassified Deltaproteobacteria bacterium S6_FULL_No.1_5.4_94	University of Delaware											2141298	2090	no
2836550251	Ga0400655	Hydrothermal Fe-rich Mat Reference Genomes	Unclassified Zetaproteobacteria bacterium 481-BS4_FULL_No.11_0.5_23	Western Washington University											659949	787	no
3300019454	Ga0193914	Microbial communities from sediments and microbial mats in various locations	Sorted cell/s from Southern Trench hydrothermal vent microbial mat, Guaymas Basin, Mexico - 4F_dil_4869_18_07	DOE Joint Genome Institute (JGI)		SAMN08779148	SRX3973901	Illumina NextSeq-HO	2001	Mexico: Guaymas Basin	hydrothermal vent orange microbial mat from Ultra Mound gradient site	27.001	-110.6	2016/12/21	25357591	27739	no
2616644899	Ga0072705	Hydrothermal vent microbial communities from Crab Spa hydrothermal vent, East Pacific Rise	Sulfurovum sp. SCGC AD-698-J17 (contamination screened)	Bigelow Laboratory Single Cell Genomics Center (SCGC)				Illumina		Pacific Ocean: East Pacific Rise, Crab Spa		9.83997	-104.294		645254	655	no
3300005744	Ga0077100	Microbial community analysis of hydrothermal vent diffuse flow samples from Mid-Cayman Rise, Pacific Ocean	Microbial community analysis of hydrothermal vent diffuse flow samples from Mid-Cayman Rise, Pacific Ocean - FS842	Marine Biological Laboratory				Illumina MiSeq	2388	Mid-Cayman Rise, Pacific Ocean	Ravelin #2 hydrothermal vent FS842	18.3752	-81.7971	2012/1/17	26859940	33289	no
3300048741	Ga0496909	Hydrothermal vents viral and microbial communities from various locations in Pacific Ocean	Metatranscriptome of hydrothermal vent fluid microbial communities from North Pacific Ocean - A5006-deckA (Metagenome Metatranscriptome)	DOE Joint Genome Institute (JGI)		SAMN52640054	SRX30974614	Illumina NovaSeq S4	2516	North Pacific Ocean	Pelagic ocean, hydrothermal vent fluid	9.838	-104.291	2018/12/10	32371271	74391	yes
2616644887	Ga0072693	Hydrothermal vent microbial communities from Crab Spa hydrothermal vent, East Pacific Rise	Thaumarchaeon SCGC AD-687-J09 (unscreened)	Bigelow Laboratory Single Cell Genomics Center (SCGC)				Illumina		Pacific Ocean: East Pacific Rise, Crab Spa		9.83997	-104.294		409841	492	no
2617270893	Ga0073559	Genome sequencing of Thermotogales isolates from hydrothermal vents	Thermosipho melanesiensis 433	Norwegian Sequencing Centre (NSC)		SAMN03284849		Illumina MiSeq		Pacific Ocean, Lau Basin	Pacific Ocean, Lau Basin				1890074	1882	no
3300038381	Ga0434947	Diffuse flow microbial communities from hydrothermal vent near Loihi Seamount, Hawaii, USA	Diffuse flow microbial communities from hydrothermal vent near Loihi Seamount, Hawaii, USA - 23	The Marine Biological Laboratory				Illumina NextSeq	1000.000000 to 1200.000000	USA: Loihi Seamount, Hawaii	Diffuse flow from hydrothermal vent	18.92	-155.27	2018/8	200442813	292195	yes
2836506071	Ga0400627	Hydrothermal Fe-rich Mat Reference Genomes	Unclassified Zetaproteobacteria bacterium 479-BS3_FULL_No.1_66.1_97	Oregon Health and Science University (OHSU)											1950247	2155	no
2616644876	Ga0072668	Hydrothermal vent microbial communities from Crab Spa hydrothermal vent, East Pacific Rise	Aquificae bacterium SCGC AD-133-I03 (unscreened)	Bigelow Laboratory Single Cell Genomics Center (SCGC)				Illumina		Pacific Ocean: East Pacific Rise, Crab Spa		9.83997	-104.294		129820	162	no
3300021512	Ga0190303	Microbial communities from sediments and microbial mats in various locations	Hydrothermal vent sediment bacterial communities from Southern Trench, Guaymas Basin, Mexico - 4870-07-0-1_MG	DOE Joint Genome Institute (JGI)		SAMN08779077	SRX3982094	Illumina HiSeq 2500-1TB	1999	Mexico: Guaymas Basin	Cathedral Hill gradient site area, sediment	27.0114	-110.593	2016/12/22	346764346	732227	yes
2836453751	Ga0400579	Hydrothermal Fe-rich Mat Reference Genomes	Unclassified Zetaproteobacteria bacterium 664-SC8_FULL_No.10_0.7_8	University of Delaware											331575	406	no
3300017530	Ga0186823	Archaeal and Bacterial diversity and function in deep-sea hydrothermal influenced sediments	Deep-sea sediment microbial communities from hydrothermal vent field in the North Atlantic Ocean - Rainbow vent	Biocant				Illumina MiSeq	2362	the North Atlantic Ocean	deep-sea hydrothermal vent field	36.2309	-33.9045	2013/8/13	574201846	1382338	no
2616644871	Ga0072663	Hydrothermal vent microbial communities from Crab Spa hydrothermal vent, East Pacific Rise	Sulfurovum sp. SCGC AD-133-C09 (contamination screened)	Bigelow Laboratory Single Cell Genomics Center (SCGC)				Illumina		Pacific Ocean: East Pacific Rise, Crab Spa		9.83997	-104.294		480720	461	no
2836518008	Ga0400634	Hydrothermal Fe-rich Mat Reference Genomes	Unclassified Zetaproteobacteria bacterium 479-BS4_FULL_No.4.1_2.6_47	Western Washington University											1509675	1690	no
3300001551	Ga0012532	Hydrothermal vent plume microbial communities from Lau Basin, Pacific Ocean	Hydrothermal vent plume microbial communities from Lau Basin, Pacific Ocean - Lau MG2b					Illumina HiSeq 2000		Lau Basin, Pacific Ocean	Lau Basin, Pacific Ocean	20.32	176.8		1101951	1758	no

## Sheet: Table S2
Table S2. DSV70 metagenomes used in this study
Metagenome ID	Sample	Site	Vent field	Year	Expedition	Latitude	Longitude	Depth (mbsl)	SRA accession	Biosample accession	Assembly size (bp)	Number of contigs	Average contig size (bp)	Maximum contig size (bp)	Number of predicted proteins	Tc 16S present
3119-7	3119-7	MAR	Lucky Strike	1997	AT03-03	37.29	-32.278	1721	SRR33956857	SAMN49033788	365247535	61134	5975	224508	375257	yes
356-1-R2-1-304	J2-356-1-R2-1	MAR	Lucky Strike	2008	KNOX18RR	37.2921	-32.2751	1619.79	SRR33214773	SAMN48057961	429154754	71796	5977	458807	453790	yes
357-4-R2-2-365	J2-357-4-R2-2	MAR	Lucky Strike	2008	KNOX18RR	37.2917	-32.2779	1721.22	SRR33214772	SAMN48057962	476687241	81613	5841	672784	493694	yes
357-6-R1-1-358	J2-357-6-R1-1	MAR	Lucky Strike	2008	KNOX18RR	37.2909	-32.2819	1729.82	SRR33214771	SAMN48057963	204144443	36016	5668	311589	220219	yes
352-5-R1-1-3	J2-352-5-R1-1	MAR	Rainbow	2008	KNOX18RR	36.2291	-33.9032	2297.59	SRR33214776	SAMN48057958	165089994	24692	6686	288399	187890	yes
353-5-R2-1-66	J2-353-5-R2-1	MAR	Rainbow	2008	KNOX18RR	36.2295	-33.903	2291.99	SRR33214775	SAMN48057959	397797807	53622	7419	431369	412012	yes
355-1-R3-1-177	J2-355-1-R3-1	MAR	Rainbow	2008	KNOX18RR	36.2294	-33.9029	2292.38	SRR33214774	SAMN48057960	218486135	32281	6768	393243	241118	no
363-7-R1-3-628	J2-363-7-R1-3	MAR	TAG	2008	KNOX18RR	26.1367	-44.8255	3620.72	SRR33214770	SAMN48057964	156891913	27448	5716	221216	176265	yes
363-7-R3-1-636	J2-363-7-R3-1	MAR	TAG	2008	KNOX18RR	26.1367	-44.8255	3620.8	SRR33214769	SAMN48057965	181769603	25570	7109	237743	194044	yes
363-7-R4-1-593	J2-363-7-R4-1	MAR	TAG	2008	KNOX18RR	26.1368	-44.8255	3620.51	SRR33214768	SAMN48057966	268993255	39942	6735	252405	279585	yes
MS15-CHA3	MS15-CHA3	MAR	Snake Pit	1995	Microsmoke	23.369	-44.95	3500	SRR33214777	SAMN48057957	60701910	7650	7935	296585	71674	yes
3133-4a	3133-4a	MAR	Logatchev	1997	AT03-03	14.753	-44.98	3040	SRR33956856	SAMN49033789	475132294	64413	7376	444126	487001	no
301-2-1	J-301-2	CIR	Edmond	2001	KN162-13	-23.878	69.5967	3300	SRR33094752	SAMN47876789	250990029	35192	7132	520035	272938	yes
CIR-17	J-301-11	CIR	Edmond	2001	KN162-13	-23.878	69.5967	3300	SRR33094771	SAMN47876793	78675532	10020	7852	339097	86854	no
CIR-21	J-300-1b	CIR	Edmond	2001	KN162-13	-23.878	69.5967	3300	SRR33094773	SAMN47876795	286493656	41767	6859	376985	315020	no
296-6-3	J-296-6	CIR	Kairei	2001	KN162-13	-25.3205	70.0403	2400	SRR33094751	SAMN47876788	794164719	147144	5397	246927	801638	no
CIR-33	J-298-1	CIR	Kairei	2001	KN162-13	-25.3205	70.0403	2400	SRR33094770	SAMN47876792	559902773	77780	7199	599284	569839	yes
299-1b	J-299-1b	CIR	Kairei	2001	KN162-13	-25.3205	70.0403	2400	SRR33094772	SAMN47876794	246892779	34807	7093	734986	272969	no
Dive_187	Dive_187	Mariana Backarc Basin		1993	Y93-03	13.3845	143.917	1498	SRR33956864	SAMN49033793	716681081	112647	6362	800507	729478	yes
416-10-R1-2-21	J2-416-10-R1-2	NELSC	Maka	2009	TN234	-15.4222	-174.284	1529.56	SRR33939662	SAMN49007075	302616779	42008	7204	692836	318856	yes
416-21-R1-1-10	J2-416-21-R1-1	NELSC	Maka	2009	TN234	-15.4222	-174.284	1530.58	SRR33939661	SAMN49007076	260979945	51569	5061	337314	288597	yes
416-9-R1-1-3	J2-416-9-R1-1	NELSC	Maka	2009	TN234	-15.422	-174.284	1527.66	SRR33939669	SAMN49007077	237874469	42193	5638	316596	255723	yes
124-5-R1-1-33	J2-124-5-R1-1	ELSC-VFR	Kilo Moana	2005	TUIM05MV	-20.0539	-176.133	2617.33	SRR33151394	SAMN47998001	198573775	33568	5916	330419	226522	yes
434-2-R1-1-36	J2-434-2-R1-1	ELSC-VFR	Kilo Moana	2009	TN236	-20.0538	-176.134	2620.77	SRR33151382	SAMN47998007	706226736	120536	5859	311691	598435	yes
434-4-R1-2-67	J2-434-4-R1-2	ELSC-VFR	Kilo Moana	2009	TN236	-20.0538	-176.134	2616.4	SRR33151381	SAMN47998008	91424317	16325	5600	279565	110420	yes
127-1-R1-1-172	J2-127-1-R1-1	ELSC-VFR	Tow Cam	2005	TUIM05MV	-20.3178	-176.137	2714.16	SRR33151393	SAMN47998002	415527204	72100	5763	391396	452451	yes
139-2-R1-1-818	J2-139-2-R1-1	ELSC-VFR	Tow Cam	2005	TUIM05MV	-20.3165	-176.136	2708.13	SRR33151383	SAMN47998006	410796270	83221	4936	254930	443009	yes
451-1-R1-2-1768	J2-451-1-R1-2	ELSC-VFR	Tow Cam	2009	TN236	-20.3163	-176.137	2716.41	SRR33151387	SAMN47998016	163395747	30873	5293	290301	183070	yes
444-23-R2-1-1360	J2-444-23-R2-1	ELSC-VFR	Tahi Moana	2009	TN236	-20.6845	-176.183	2215.48	SRR33151391	SAMN47998012	569278995	119982	4745	232883	612255	yes
444-4-R1-1-1274	J2-444-4-R1-1	ELSC-VFR	Tahi Moana	2009	TN236	-20.6817	-176.183	2229.05	SRR33151390	SAMN47998013	433839301	85765	5058	890524	465760	no
445-6-R1-1-1388	J2-445-6-R1-1	ELSC-VFR	Tahi Moana	2009	TN236	-20.6739	-176.18	2256.06	SRR33151389	SAMN47998014	347370700	69498	4998	728579	382874	no
128-2-R1-1-336	J2-128-2-R1-1	ELSC-VFR	ABE	2005	TUIM05MV	-20.7615	-176.19	2142.06	SRR33151386	SAMN47998003	430940558	97042	4441	232765	455568	yes
435-20-R1-1-231	J2-435-20-R1-1	ELSC-VFR	ABE	2009	TN236	-20.7612	-176.191	2141.63	SRR33151380	SAMN47998009	328232583	66259	4954	343267	357117	no
435-9-R1-1-283	J2-435-9-R1-1	ELSC-VFR	ABE	2009	TN236	-20.7661	-176.193	2134.23	SRR33151379	SAMN47998010	388733199	76984	5050	255081	432380	yes
138-7-R1-1-778	J2-138-7-R1-1	ELSC-VFR	Tui Malila	2005	TUIM05MV	-21.9897	-176.569	1867.54	SRR33151384	SAMN47998005	447437078	91510	4889	180323	470744	yes
447-1-R1-1-1579	J2-447-1-R1-1	ELSC-VFR	Tui Malila	2009	TN236	-21.9901	-176.569	1846.97	SRR33151388	SAMN47998015	266248342	51837	5136	269816	294486	yes
130-1-R2-1-408	J2-130-1-R2-1	ELSC-VFR	Mariner	2005	TUIM05MV	-22.1807	-176.601	1908.47	SRR33151385	SAMN47998004	451554236	87599	5155	183366	489229	no
439-5-R1-1-672	J2-439-5-R1-1	ELSC-VFR	Mariner	2009	TN236	-22.1802	-176.601	1911.12	SRR33151392	SAMN47998011	223679879	35963	6220	310230	247356	yes
JdF4-4136	4136-1-2	JdFR	Endeavour segment, North Clam Bed (original site)	2005	AT11-31	47.97	-129.09	2200	SRR33956858	SAMN49033787	173694508	32047	5420	233882	183916	no
JdF3-4135	4135-1-1	JdFR	Endeavour segment, Smoke & Mirrors	2005	AT11-31	47.95	-129.1	2200	SRR33956859	SAMN49033786	565160591	91436	6181	438745	565926	no
3769-1	3769-1	EPR	9N, Bio9	2002	AT07-06	9.84	-104.29	2497	SRR33956868	SAMN49033781	151885321	20955	7248	257211	163338	yes
Adv9-150	3751-2	EPR	9N, Biovent	2002	AT07-06	9.85	-104.293	2492	SRR33956863	SAMN49033782	761452659	130659	5828	444075	791922	yes
Adv9-453	3766-1	EPR	9N, C vent	2002	AT07-06	9.65	-104.26	2538	SRR33956861	SAMN49033784	352495674	59556	5919	370715	362737	no
Adv9-388	3762-1	EPR	9N, F vent	2002	AT07-06	9.27883	-104.22	2559	SRR33956862	SAMN49033783	406367782	56571	7183	475489	447458	yes
3753-1-204	3753-1	EPR	9N, L vent	2002	AT07-06	9.77	-104.28	2507	SRR33956869	SAMN49033780	438768796	62195	7055	383401	455501	yes
3987-4-1-104	3987-4-1	EPR	9N, P middle	2004	AT11-09	9.83802	-104.291	2509	SRR33939670	SAMN49007068	316669403	47300	6695	519368	341289	yes
3986-1-1	3986-1-1	EPR	9N, Ty	2004	AT11-09	9.83541	-104.291	2504	SRR33939671	SAMN49007067	197448366	31972	6176	339981	209349	no
4274-2-1-4	4274-2-1	EPR	9N, Bio9'	2006	AT15-13	9.83843	-104.291	2509	SRR33939668	SAMN49007069	466340022	88608	5263	312188	506199	no
4275-1-22	4275-1-1	EPR	9N, Biovent	2006	AT15-13	9.8494	-104.294	2504	SRR33939667	SAMN49007070	764269959	123233	6202	696270	829639	yes
4279-1-1-88	4279-1-1	EPR	9N, Ty	2006	AT15-13	9.83537	-104.291	2504	SRR33939666	SAMN49007071	255510053	44126	5790	349140	287436	no
4375-3-32	4375-3-1	EPR	9N, Bio9	2007	AT15-27	9.83856	-104.291	2509	SRR33939664	SAMN49007073	954911123	165387	5774	291201	1011978	yes
4375-2-1-20	4375-2-1	EPR	9N, Bio9'	2007	AT15-27	9.83862	-104.291	2506	SRR33939665	SAMN49007072	195829270	37501	5222	266860	217057	no
4381-2-156	4381-2-1	EPR	9N, P vent tall	2007	AT15-27	9.83813	-104.291	2507	SRR33939663	SAMN49007074	309934222	48122	6441	412993	332853	no
3327-2	3327-2_3_5_7_9	SEPR	17º 25', South/Rehu Marka	1998/1999	AT03-30	-17.4	-113.2	2578	SRR33956867	SAMN49033790	52006912	3503	14846	1515002	55060	no
3328-5	3328-5	SEPR	17º 25', Stanley/Marker 21	1998/1999	AT03-30	-17.4	-113.2	2582-2599	SRR33956866	SAMN49033791	850634014	134560	6322	597727	852547	no
3336-2	3336-2_3	SEPR	21º 33', Upper Feathers	1998/1999	AT03-30	-21.57	-114.3	2836	SRR33956865	SAMN49033792	645942032	103848	6220	420582	665816	no
3795-28	3795	Galapagos Rift		2002	AT07-13	0.83	-89.6083	1660	SRR33956860	SAMN49033785	822180632	124943	6580	542451	810880	no
3523-3-203	3523-3	Guaymas Basin	Kristin's Summit	2000	AT03-46	27.014	-111.411	2000	SRR32938010	SAMN47734230	353254495	58012	6089	397633	377160	yes
3517-1-1	3517-1	Guaymas Basin	Rebecca's Roost	2000	AT03-46	27.011	-111.407	2000	SRR32938011	SAMN47734229	370411269	56200	6591	370738	413408	yes
3519-1-75	3519-1	Guaymas Basin	Robin's Roost	2000	AT03-46	27.014	-111.411	2000	SRR32939039	SAMN47735320	420492486	81146	5182	219957	435002	yes
T526-G7-64	T526-G7	Guaymas Basin	Cathedral Hill	2003	WF Expedition 2636, Leg 2	27.0117	-111.404	2007	SRR32938007	SAMN47734232	639394089	101247	6315	638682	657340	yes
T528-G2-109	T528-G2	Guaymas Basin	near Southern West (Toadstool)	2003	WF Expedition 2636, Leg 2	27.0071	-111.408	2012	SRR32938005	SAMN47734234	488912012	77488	6310	1375234	551163	yes
T521-G4B-3	T521-G4B	Guaymas Basin	Rebecca's Roost	2003	WF Expedition 2636, Leg 2	27.0113	-111.407	1993	SRR32938008	SAMN47734231	439498365	85182	5160	263871	479704	yes
T527-G1-95	T527-G1	Guaymas Basin	Theme park	2003	WF Expedition 2636, Leg 2	27.0112	-111.405	2016	SRR32938006	SAMN47734233	410461992	69828	5878	414027	442218	yes
4558-2-173	4558-2-R1-1	Guaymas Basin	Northern Area (near Giant Pagoda)	2009	AT15-55	27.0151	-111.41	2011	SRR32938002	SAMN47734237	551062983	91800	6003	502676	578299	yes
4558-3-205	4558-3-R1-1	Guaymas Basin	Northern Area (near Giant Pagoda)	2009	AT15-55	27.015	-111.41	2009	SRR32938001	SAMN47734238	432148166	73865	5851	314076	461486	yes
4556-1-31	4556-1-R1-1	Guaymas Basin	Southern Area	2009	AT15-55	27.0065	-111.409	2002	SRR32938004	SAMN47734235	264874605	45990	5759	266193	292841	yes
4556-2-45	4556-2-R2-1	Guaymas Basin	Southern Area	2009	AT15-55	27.0064	-111.41	2007	SRR32938003	SAMN47734236	440039725	75609	5820	437317	502133	yes
4556-2-56	4556-2-R1-1	Guaymas Basin	Southern Area	2009	AT15-55	27.0064	-111.41	2007	SRR32939038	SAMN47735321	420116533	82590	5087	257161	473887	yes
4559-3-258	4559-3-R1-1	Guaymas Basin	Southern Area	2009	AT15-55	27.0077	-111.407	2008	SRR32938009	SAMN47734239	762668868	112316	6790	395795	808827	yes

## Sheet: Table S3
Table S3. Thermococcales repeats from sequenced organisms
AATTCTTTTTTAGTTTAGTCTTATTGGAAC
ACTTTCAATTCTCTTGGAGTCTTATTGGAA
AGTTTCCACTCTTCTAGAGGTTCGGAAAC
AGTTTCCGAACCTCTAGAAGAGTGGAAAC
ATTCCAATAAGACTAAAATAGAATTGAAAG
ATTCCAATAAGACTTTAGAAGAATTGAAAG
ATTTCAATTCTATTTTAGTCTTATTGGAAC
ATTTCAATTCTCCCAGAGTCTTATTGCAAC
ATTTCAATTCTCCTAAAGTCTTATTGGAAA
ATTTCAATTCTCTTAGAGTCTTATTGCAAC
ATTTCAATTCTCTTCGAGTCTTATTGCAAC
ATTTCCACACGACTACGTTCTACGGAAAC
ATTTCCATTCTCTTGGAGTCTTATTGCAAC
CCCAAAATTCTCCTAGAGTCTTATTGCAAC
CCCAGAATTCACCTAGAGTCTTATTGCAAC
CCTTTCAATTCTCTTCGAGTCTTATTGCAAC
CCTTTCAATTCTTTTTAGTCTTATTGGAAC
CGTTTCCACTCTTCTAGAGGTTCGGAAAC
CGTTTCCGAACCTCTAGAAGAGTGGAAAC
CTAGGAATTCCCCTAGAGTCTTATTGCAAC
CTCAAAATTCTCCTGGAGTCTTATTGCAAC
CTCCCACACAATTCTGTCGCTACTGAAAC
CTTCAATTCTTTTGTAGTCTTATTGGAAC
CTTCAATTCTTTTGTAGTCTTATTGTAAC
CTTCCAATAAGACTCCAAGAGAATTGAAAG
CTTCCAATAAGACTCCAGGAGAATTGAAAG
CTTCCAATTCTCTTTTAGTCTTATTGGAAC
CTTCCCACACTATTTAGTTCTACGGAAAC
CTTTAAATTCTATTTTAGTCTTATTGGAAC
CTTTCAATACTTCTAAAGTCTTATTGGAAC
CTTTCAATTCTATTCTAGTCTTATTGGAAC
CTTTCAATTCTATTTTAGTCTTATTGGAAC
CTTTCAATTCTATTTTAGTCTTATTGGAAT
CTTTCAATTCTATTTTGGTCTTATTGTAAC
CTTTCAATTCTCCCAGAGTCTTATTGCAAC
CTTTCAATTCTCCTAAAGTCTTATTGCAAC
CTTTCAATTCTCCTAAAGTCTTATTGGAAA
CTTTCAATTCTCCTAAAGTCTTATTGGAAC
CTTTCAATTCTCCTAAAGTCTTGTTGGAAA
CTTTCAATTCTCCTAAAGTTTTATTGGAAA
CTTTCAATTCTCCTAAGAGTCTTATTGCAA
CTTTCAATTCTCCTAGAGTCTTATTGCAA
CTTTCAATTCTCCTAGAGTCTTATTGCAAC
CTTTCAATTCTCCTAGAGTCTTATTGGAAC
CTTTCAATTCTCCTCGAGTCTTATTGCAAC
CTTTCAATTCTCCTGGAGTCTTATTGCAAC
CTTTCAATTCTCCTGGAGTCTTATTGGAAC
CTTTCAATTCTCCTTGAGTCTTATTGCAAC
CTTTCAATTCTCTAGAGTCTTATTGCAACG
CTTTCAATTCTCTTAGAGTCTTATTAAAAC
CTTTCAATTCTCTTAGAGTCTTATTGAAAC
CTTTCAATTCTCTTAGAGTCTTATTGCAAC
CTTTCAATTCTCTTAGAGTCTTATTGGAAC
CTTTCAATTCTCTTAGAGTCTTTTGCAAC
CTTTCAATTCTCTTCGAGTCTTATTGCAAC
CTTTCAATTCTCTTCGAGTTTATTGCAACA
CTTTCAATTCTCTTCTAGTCTTATTGGAAC
CTTTCAATTCTCTTCTAGTCTTATTGTAAC
CTTTCAATTCTCTTGGAGTCTTATTGGAA
CTTTCAATTCTCTTGGAGTCTTATTGGAAC
CTTTCAATTCTCTTTGAGTCTTATTGCAAC
CTTTCAATTCTCTTTGAGTCTTATTGGAAC
[truncated: 556 more rows]

## Sheet: Table S4
Table S4. Published and predicted viral genomes
[truncated: 621 more rows]

[truncated: 2 more sheets: Table S5, Table S6]
